# Supplementary material for: Development of Dietary Supplement Label Database in Italy: Focus of FoodEx2 Coding
Source: Nutrients. 2019 Dec 27;12(1):89. doi: 10.3390/nu12010089 (PMC7019334; doi:10.3390/nu12010089)
Supplement: Supplementary file 1 [file nutrients-12-00089-s001.xlsx]

## Sheet: TS1
ID	Remarks	Content per	Vitamin A µg (retinol equiv)	Beta-Carotene µg	Thiamin (B1) mg	Riboflavin (B2) mg	Niacin (B3) mg	Pantothenic acid (B5) mg	Vitamin B6 (Pyridoxine) mg	Biotin (B7) (B8) mg	Folic acid (B9) µg	Vitamin B12 µg	Vitamin C mg	Vitamin D µg	Vitamin E (tocopherol equiv) mg	Vitamin K µg	Calcium mg	Potassium mg	Sodium mg	Phosphorus mg	Iron mg	Magnesium mg	Copper mg	Selenium µg	Zinc mg	Iodine mg	Manganese mg	Chlorine mg	Fluorine mg	Boron µg	Molybdenum µg	Chrome µg	Tin µg	Nickel µg	Silicon µg	ALA (alpha-Linolenic acid) mg	Conjugated linolenic acid mg	DHA (docosahexaenoic acid) mg	EPA (eicosapentaenoic acid) mg	GLA (gamma linolenic acid) mg	Linoleic acid mg	Oleic acid mg	Arachidonic Acid mg	Borage oil mg	Citrus oil mg	Linseed oil mg	Olive oil mg	Omega-3-Fatty acids mg	Omega-6-Fatty acids mg
P0001		tablet	800	0	1.1	1.4	16	6	1.4	0.05	200	2.5	80	5	12						14	60	1		10	0.15	1.5
P0002	Available also as effervescent tablets.	swallowable tablet	800	1200	1.4	1.75	20	7.5	2	0.0625	200	2.5	100	5	15	30	162			125	5	100	0.5	30	5	0.1	2				50	40
P0003	At lemon-raspberry flavour.	chewable tablet	330		0.5	0.5	5	2.5	0.5	0.05	200	1	50	3	5						4.5			12.5	2.8		0.5
P0004	Contains creatine monohydrate, L-carnitine, L-glutathione.	sachet			0.7				1		100	0.5	30		5			150			7	50		35
P0005	Contains also echinacea dry extract, barbados cherry (Malpighia glabra L.) and posphorylserine.	bottle			0.45	0.3	6.5	3	0.6		75	0.7										28.13
P0006		tablet																				225
P0007	Contains ginseng concentrated extracts.	capsule	800		1.4	1.6	18		2	0.15	100	1	60	5	10						10		2	50			2.5
P0008	Contains also blueberry dry extract.	tablet	800	0	0	0		0	0	0		0	0	0	15	0	0	0	0	0	0	0			0
P0009		tablet
P0010		capsule
P0011		swallowable, film-coated tablets	800		1.1	1.4	16	6	1.4	0.05	200	2.5	120	5	18	75	120	15		73	4.2	56	0.3	17	3	0.045	0.6	13	1	38	15	12	3	2	1
P0012	Contains creatine monohydrate, carnosine and acetil L-carinitine taurinate.	sachet													15			100	0			100		20	7.5
P0013	Contains creatinine, L-carnitine and taurine.	sachet			0.55	0.7	8	3	0.7		100	940	40					150				100
P0014	Contains pineapple (Ananas Comosus (L.) merr.) dry extract.	capsule	517	3100											7.5																									32.5
P0015	with Eleutherococcus dry extracts. Contains L-carnitine tartrate.	sachet											90		13.67									25
P0016	Contains para aminobenzoic acid (PARA). Contains millet extract powder. Contains L Cystin.	capsule						7.36	0.7	0.075							0.64				3		0.5	30	3							30
P0017		candy											5
P0018		tablet																			105
P0019		tablet																				100
P0020	Contains also N -(2 aminopropyl) tetramethylenediamine-trichloro hydrate. Available also as sachet.	Extended-Release tablet						8.28	2	0.05	300		90		15		0.76						1.2		7.5
P0021	Contains also isoflavons from soy.	tablet																						50
P0022	Contains also isoflavons from soy.	tablet																				30
P0023	Available also at a different amount of active ingredient.	softgel													268
P0024	Available also as capsules at a different amount of active ingredient.	100 ml																											114
P0025	Available also as effervescent tablets.	table	800	2400	1.65	2.1	24	9	2.1	0.075	300	3	120	5	18	30	162			125	2.1	100	0.5	30	5	0.1	2				50	40
P0026	Available at different amount of active ingredient and also as chewable tablets and as granulates (sachets). Available also at different flavours (limon, orange) or without sugars or with sugar added.	effervescent tablet											500
P0027	Contains fish oil.	softgel													1.8																							200	400
P0028	Contain also Saccharomyces cerevisiae, Lactobacillus acidophilus La14, Bacillus coagulans Bc513, Bifidobacterium longum Bl04. Available also as sachets at peach flavour. Contains L Cystin.	swallowable tablet			0.83	1.05	12	4.5	1.05		150	1.25
P0029		effervescent ablet	1000		20	5	50.41	11.6	10	2.3		5	150	10	10		51			45	1.25	5	0.1		0.5		0.5				100
P0030	Contains inositol. With orange flavour and without sugar. Available also as drops.	effervescent tablet			25	25		18	9.5		400	25
P0031	Contains romice (Rumex crispus L.) rhizoma dry extract, equiseto (Equisetum arvense L.) dry extract.	tablet									200	2.5	60								9.1
P0032		Extended-release hard capsule											500
P0033	Contains Brewer's yeast.	tablet	400		2.1	2.4	13.5	18	3	0.45	400	3.75	240	5	36						21	56	0.9	83	22.5	0.1124	5					100
P0034	Contains also fucus dry extracts, pineapple dry extract , dandelion dry extract, ginko biloba dry extract, citroflavonoids dry extract. It was reported for vitamin A only the contribution of beta carotene.	softgel	333	2000						0.01667			30		5								0.33
P0035	Available also solution per os and as effervescent tables.	sachet																				184
P0036	Contains lactobacillus acidophilus. The content of fibre is referred only to soluble fibre.	sachet
P0037	Contains concentrated gel aloe vera .	capsule
P0038	Contains omega-3 fatty acids from fish oil.	capsule																																				200	400									750
P0039	The content of sugars is referred to fructose. Contains salt.	sachet											80		5			126.96	286.52			21.74						185
P0040	At orange flavour.	100g			0.6												380		860			160
P0041	without sugars.	sachet																300				187.5						90.7
P0042	Contains creatine.	sachet			2								80								7	200			6
P0043	Available as effervescent tablets at different amount of active ingredient and also chewable tablet, as sachet. This formulation is present in orange flavour.	effervescent tablet												10			600
P0044		sachet												22			1000
P0045		phial																			40
P0046	Contains tamarind (Tamarindus Indica) fruit dry extracts, cassia fistula dry extract, buckthorn (Rhamnus Frangula) bark dry extracts, seine (Cassia Angustifolia) leaves dry extracts, pineapple (Bromelia ananas) stem dry extracts , star Anise (Illicium verum) fruit powder, fructo-oligosaccharides, inulin.	tablet																								0.044						20
P0047	Available as injectable solution.	softgel									5000
P0048	Contains vitamins and minerals as well as fructo-oligossacarides and lactobacilli. At vanilla flavour. Available also as solution per os.	100 ml at standard diluition
P0049		chewable tablet
P0050		drop												4.8
P0051	Contains short chain fructo-oligosaccharides, corn dextrins , lysate Brewer's yeast, and lactobacilli such as lactobacillus acidophilus, LA-5, bifidobacterium, BB-12,Lactobacillus paracasei, L.CASEI 431, Bacillus coagulans.	gastro-resistant capsule			0.42	0.48	5.4	1.8	0.6			0.3
P0052	Contains flavonoids from citrus.	bottle	400	50					1				30		15									48	5
P0053	Available also as injectable solution and injectable solution for intramuscolar use.	1 ml										20
P0054	It was reported for vitamin A only the contribution of beta carotene	tablet	500	3000	1.4	1.7	22	6	1.9	0.035	400	2.6	100	12.5	12		140				27	60	0.5	30	11	0.175	2					40
P0055	Contains vitamins.
P0056	Contains salt 1g. At chocolate flavour.	100 g	1110		1.2	1.8	20	6	2.4		400	4.5	85	33	12	130	1100	2000		990	15	220		57	16
P0057	Contains chondroitin and Methylsulfonylmethane (MSM), Glucosamine.	120 ml											250
P0058	Contains sweet orange essential oil.	4 small softgels																																				576	864									1790
P0059	At orange flavour. Contains propolis dry extract, white willow dry extract, dog rose dry extract.	effervescent tablet											5.6
P0060	Contains Vitis vinifera dry extract. Available at a different amount of active ingredient.	capsule
P0061		softgel capsule													400
P0062	Contains rutin and gotu kola dry extract, sweet clover dry extract.	softgel													30
P0063	Contains calcium levo-folinate pentahydrate. Available as granulate per os and powder for injection solution for intravenouse use.	tablet									6992						634.9
P0064	Contains ginko leaves concentrated extract.	opercola
P0065	Contains glucomannan total phytocomplex derived from tuber (Amorphophallus konjac).	opercola
P0066	Contains soy lecithyn (source of omega 3 and omega 6 fatty acids), Selenium, Vitamin E and Vitamin B6. Contains salt.	100 g
P0067	Available also at different amount of active ingredients and as capsules, chewable tablet or as precipitate.	tablet															200
P0068		tablet															210.23		17.57			20.47
P0069	Contains native type II collagene.	capsule											24.2		9.6								1
P0070		tablet			0.058														0.17
P0071
P0072	Contains brewer's yeast (Saccharomyces cerevisiae). Contains salt.	tablet
P0073	Available also as phials.	gastro-resistant tablet			197				205.64			500
P0074		tablet									400		120													0.175
P0075	In particular contains soluble fibre and insoluble fibre.	sachet																			1.4				1.5
P0076	Contains blueberry dry extract.	tablet
P0077	Contains dog rose fruit extract.	tablet											500
P0078		softgel													12																									45
P0079	Contains γ orizanol. Contains fish oil, borage oil, wheat germ oil. Contains L Cystin.	capsule				0.8		3	0.5	0.075			12.5		7.5										5													1.6	2.3	3.4
P0080	Available also as phial.	effervescent tablet																			80
P0081		sachet											105		7			127	286			22						185
P0082	Available at different flavours.	dose			0.42	0.48	5.4	1.8	0.6	0.045	60	0.3
P0083	Contains alendronic acid as sodium trihydrate. Available at a different amount of active ingredient.	tablet												70
P0084		table spoon (10 g d.w.)																	1				0.39		2.32
P0085	Contains rhubarb (Rheum palmatum L. / Rheum officinale Baill.) roots dry extract; fig tree ' fruit (Ficus carica L.) concentrated juice powder; tamarind pulp (Tamarindus indica L.) dry extract; acacia (Acacia senegal L.) Fibres 50mg; rhubarb (Rheum rhaponticum L. / Rheum rhabarbarum L.) stalks powder.	tablet
P0086	Contains royal jelly lyophilized, Acerola fruit juice lyophilized,Cyanidin-3 (composted by Blueberry fruit juice + lyophilized dry extract , Elderberry fruit juice lyophilized ,Blackberry fruit juice lyophilized). Available at a different amount of active ingredients.	sachet
P0087		1 ml																			50
P0088	Contains birch leaves dry extracts, diosmin, diosmetin, hesperidin, sweet clover flowering tops dry extracts.	coated tablet
P0089		orodispersible tablet												10			600
P0090		sachet												22			1000
P0091		effervescent tablet	800		1.4	1.6	18	6	2	0.03	200	1	60	4	10	25	120	20.4			14	80	0.9	50	8	0.075	1.8	37.5			45	25
P0092	contains creatine monohydrate.	sachet			0.7				1		100		30		5			42			7	50		35	7.6
P0093		retard tablet			0.7	0.8	9		1		100	0.5	30		5
P0094	β-glucans from Saccharomyces cerevisiae. Available also as tablets.	10 ml						5.52	0.7			2.5		2.5			0.48									0.2
P0095		20 g																											20
P0096	Contains posphorylserine.	coated tablet			1.13	1.6	18.15	8.28	3		200	1.5	120		18.2		207			160		54.27			3.61		1.43
P0097		chewable tablet	750		1.62	1	10.1		0.82	0.3		3	50	10	2.7
P0098		tablet	300		0.55	0.65		3	0.55		90	1	25	7.5	5		50				6				4.5
P0099		100 ml			5.19		100.81		16.45		10000	100									330		3.3
P0100		tablet									400
P0101	Contains cranberry concentrated juice powder. Available also solution per os. At berries flavour.	sachet
P0102	At chocolate flavour. Available also at strawberry flavour.	chewable tablet	100		0.35	0.5	5.5	3	0.45			0.25	22.5	1.5			50								0.88
P0103	Contains L-carnitine and phosphorylserine.	bottle	500		0.9	1.2	14.1	6	1.1		180	1.5	50	10
P0104		softgel	81											0.675
P0105	Contains Lactobacillus casei DG. Available also as solution per os and capsule.	sachet
P0106		chewable tablet	330		0.5	0.5	5	2.5	0.5	0.05	200	1	50	3	5						4.5			12.5	2.8		0.5
P0107	Contains isoflavonoids from soy.	tablet
P0108	Contains isoflavonoids from soy .	tablet																														12.5
P0109	Contains fish oil.	softgel																																				220	330
P0110	Contains linseed oil.	softgel																																		500
P0111	At orange flavour. Available also as lemon flavour and as swallawable tablet in an other formulation.	sachet																100				37.5
P0112	Contains citrate. The content of sugar is referred to glucose.	sachet			0.1	0.1	1.15		0.1		12.5	0.1						78.5	138									165.5
P0113	Contains carnitine and taurine.	sachet											180		15			146	300			25			15			200
P0114	At orange flavour. Contains carnitine and taurine, salt.	sachet											180		15			146							12.5			200
P0115		sachet											40					300				187.5
P0116	Contains caffeine and posphorylserine.	sachet						6													14				10	0.15
P0117	Contains carnosine and lyophilized royal jelly.	sachet			0.7	1	11	2	0.9	0.05	130	1	45	5	3
P0118		drop												2.5
P0119		6 drops (dose)			0.6	0.8	9				100	0.7		7.5															0.25
P0120		10 drops (dose)	400		0.6	0.8	9		0.7	0.1	100	0.7	20	10	3
P0121		tablet												10
P0122	Contains red yeast rice, gamma orizanol, policosanols.	capsule																														200
P0123		4 softgels													9																																	3000
P0124	Contains ginkgo leaves powder, siberian ginseng radix powder, spanish sage essential oil.	opercula
P0125		sachet																576				90
P0126	Available at a different amount of active ingredient in other formulation.	sachet																380
P0127	Available as fast slow (gastro resistant) tablet at a different amount of active ingredients and as fast slow sachet.	fast-slow tablet			12.5	12.5	18		4.75		200	12.5	30		5
P0128		tablet	96		0.13	0.17	1.92	0.72	0.17	0.006	23	0.3	9.6	0.6	1.44	9					0.697	18.75	0.05	2.67	0.5	0.00767	0.1		0.173		2.33	2
P0129		swallowable tablet	800	2400	1.5	1.8	20	9	2.1	0.075	300	7.5	120	10	16	30	320			105	4.2	112.5	0.5	30	5	0.1	2				50	40
P0130		swallowable tablet	800	2400	1.65	2.1	24	9	2.1	0.075	300	7.5	120	10	18	30	200			105	2.1	135	0.5	30	5	0.1	2				50	40
P0131	Vegetable origin from alga Schizochytrium sp.	capsule																																				167	83									250
P0132		swallowable, coated tablet	800										60		12									80	10
P0133	Contains lyophilized real jelly.	bottle
P0134	Contains lyophilized real jelly.	bottle
P0135		sachet											80					300				300
P0136	Contains fructo-ologossaccharides.	sachet (effervescent)	330		0.5	0.5	5	2.5	0.5	0.05	220	1	50	3.1	5	11.3					4.5			12.5	2.8		0.5
P0137	Contains fructo-ologossaccharides.	sachet
P0138		tablet																130
P0139	Contains fermented papaya powder.	sachet																150				56.25
P0140	Contains brewer's yeast (Saccharomyces cerevisiae derived from barley).	tablet
P0141	Contains vitamin C, E, omega 6 fatty acids, Bromelian extract and microalgae Haematococcus (Astaxanthin).
P0142	Contains ginseng root extract lyophilized, guarana seed extract lyophilized,cyanidin-3 (composted by blueberry fruit juice + lyophilized dry extract, elderberry fruit juice lyophilized, blackberry fruit juice lyophilized), siberian ginseng root extract lyophilized. Available at a different amount of active ingredients in an other formulation. Contains also caffeine.	sachet (orosoluble)
P0143	Contains ginko leaves concentrated extract, rhodiola root dry extract , grape seed extract lyophilized , spanish sage essential oil.	opercula
P0144	Contains aloe vera (Aloe barbadensis Miller) powder and aloe vera (Aloe barbadensis Miller) concentrated leaves juice in powder.	capsule
P0145	Contains astragalus (Astragalus membranaceus Bung.) whole root powder and astragalus (Astragalus membranaceus Bung.), dry-extract of root	capsule
P0146	Contains pycnogenol extract.	capsule
P0147	Contains cloves garlic extract in sunflower seed oil.	opercula
P0148	Contains algae spirulina powder.	capsule
P0149		tablet									200
P0150		softgel													6.7																					520					240	240				1000
P0151	Contains silver thistle (Carlina acaulis L.) powder, inulin, fermented maltodextrins (Enzyblend) and Bacillus coagulans LMG S-24828.	tablet
P0152	Contains probiotics -Lactobacillus rhamnosus, Bifidobacterium longum, Saccharomyces boulardii-	sachet																							6
P0153	Contains polyantibiotic-resistant Bacillus clausii spores. Avalable also as bottle and at different amount of active ingredients.	capsule
P0154		capsule
P0155		capsule
P0156		tablet
P0157	Contains L- Carnosine.	tablet
P0158		softgel																																		195		74	115	82	199	108		433		433
P0159	At orange flavour. Contains Psyllium (Plantago psyllium L., tegumentum seminis). Available also as capsules and powder.	sachet																	0
P0160	At orange flavour. Contains Psyllium (Plantago psyllium L.). Available also sachet at tea flavour or tablet at orange and soft fruits favours.	sachet																	0
P0161	Contains blackcurrant dry extract, holy basil dry extract, quercetin, rutin, plantain dry extract, sage dry extract.	tablet
P0162	Contains Spirulina (Spirulina platensis) powder.	capsule
P0163	Contains valerian root powder (Valeriana officinalis).	capsule
P0164	Contains red yeast rice, barberry (Berberis), coenzyme Q10, octacosanol. Contains monacolin K .	tablet
P0165	Contains indian barberry (Berberis aristata DC) radix dried extract, milk thistle (Silybum marianum L.) fruit dry extract.	film-coated tablet
P0166	Contains pineapple jambs dry extract.	tablet
P0167	Contains dandelion (Taraxacum officinale) root dry extract.	tablet
P0168	Contains hawthorn leaves and flowers dried extract.	capsule
P0169	Contains soy lecithin. Available also as softgels.
P0170		Chewy candy	500				8			0.025	150	1.25	40	2	5									27.5	5
P0171		Chewy candy	500				8			0.025	150	1.25	40	2	5									27.5	5
P0172		drop												5
P0173	At berries flavour.	chewable tablet	400		0.9	1.1	12	4	1	0.05	200	1.3	40	10	6	30					4.2	57			3	0.045
P0174	Contains organic acids. Available at different flavours.	100 g											500.01
P0175	Contains acetil L carnitine.	tablet
P0176	Contains creatine monohydrate. Available also as tablet.	100 g
P0177	Contains betaine.	tablet									300	1.5	90								21
P0178	Contains lipoic acid.	tablet
P0179	Contains açai (Euterpe oleracea Mart.) berry extracts.	softgel
P0180	Contains chaste tree (Vitex agnus-castus L.) fruit powder.	capsule
P0181	Contains docosapentaenoic acid, omega-5 fatty acids , omega-7 fatty acids, other fatty acids and astaxanthin. The fish oil is wild alaskan salmon oil.	softgel												2.5																								90	101									250	24
P0182		capsule
P0183		capsule
P0184		capsule
P0185		capsule
P0186		capsule
P0187		capsule
P0188	Contains chlorella thallus (Chlorella pyrenoidosa ) lyophilized.	capsule
P0189		capsule
P0190	Contains stone breaker (Phyllanthus niruri L., flowers and leaves), enzyme mixture (amylase, lactase, lipase and cellulase), fumitory (Fumaria officinalis L., plant) dry extract, bromelain, papain, turmeric (Curcuma longa L., root) dry extract, superoxide dismutase (SOD).	swallowable tablet					36
P0191	Contains salt. Contains green tea dry extract, whithania somnifera dry extract. Contains N acety Cysteine.	film-coated tablet																						50			5
P0192	Contains salt. Contains nettle dry extract, carrot dry extract, lemon balm dry extract, linden dry extract, fennel dry extract, dandelion dry extract. It was reported for Vitamin A only the contribution of beta carotene.	sachet	600	3600													240	300			7	150	0.6	27.5	7.5		5				50				8000
P0193	At orange flavour. Contains pumpkin dry extract, myrrh dry extract, turmeric dry extract.	sachet
P0194	Contains quail's eggs homogenate.	tablet																							4.3
P0195	Contains PowerGrape.	sachet			1.1	1.4			1.4			2.5										150
P0196		softgel																																				150	75
P0197	At banana flavour.	chewable tablet			1.1	1.4	16	6	1.4	0.05	200	2.5					150			150
P0198	At citrus fruit flavour. Contain echinacea dry extract, acerola dry extract.	effervescent sachet			1.1	1.4	16	9	2.1		200	2.5	45												5
P0199	At passion fruit flavour. Contains Phosphorylserine.	orosoluble sachet			1.1	1.4	16	9	2.1		200	2.5
P0200	At citrus fruit flavour.	orosoluble sachet			1.1	1.4	16	9	2.1		200	2.5						300				90
P0201	Contains phytosterols.	swallowable tablet	400	600	0.7	0.875	10	3.75	2	0.03125	200	1.5	60	2.5	7.5	15	81			62.5	2.5	50	0.5	15	2.5	0.05	1					20
P0202	It was reported for Vitamin A only the contribution of beta carotene	tablet	400	2400	1.1	1.3	18	5	1.4	0.03	400	2.4	85	12.5	15		120				18	60	0.5	30	12.5	0.15	2					40
P0203	Contains coral.	capsule												1.25			200					75
P0204		effervescent tablet															500
P0205	Contains fibre of Psyllium (Plantago ovata Forsk., tegumentum seminis). Contains probiotics-Lactobacillus paracasei SD5275, Bifidibacterium animalis subsp. Lactis SD5219, Lactobacillus acidophilus SD5221- At vanilla flavour. Contains salt.	sachet
P0206	Contains pure fibre of Psyllium (Plantago ovata).	sachet
P0207		capsule
P0208		capsule										500
P0209	Contains alga spirulina.	capsule
P0210	Contains milk thistle extract,dandelion root extract,complex of silybin and phosphatidylcholine (from soy),turmeric extract,concentrate of bioflavonoids from Citrus fruit, acerola concentrate,silymarin, silybin.	tablet
P0211	Contains sabal extract, nettle root extract, extract of bioflavonoids from Citrus fruit.	capsule
P0212	Contains Garlic concentrate.	tablet
P0213	Contains concentrate of citrus fruit. Also spiruline concentrate (Spirulina platensis, thallus) is also contained.	capsule
P0214	Contains siberian ginseng extract, ginkgo biloba extract, schisandra berry extract, acerola concentrate, citrus fruit concentrate. Also peppermint extract is contained.	tablet
P0215	Contains wheat germ oil.	capsule													18.1
P0216	Contains glucosamine HCl (from crustaceans , molluscs), boswellia extract, citrus fruits concentrate, acerola concentrate.	capsule
P0217	Contains spinach concentrated powder.	tablet									150										10
P0218	Contains Valerian root dry extract.	coated tablet
P0219		tablet			1.1		16															375
P0220	Contains reduced glutathione.	sachet													5.47
P0221	Contains raw royal jelly.	bottle
P0222	Contains millet seed oil extract (in wheat germ oil), wheat germ oil, Brewer's dry extract, horsetail dry extract.	capsule
P0223	Contains milk thistle extract. Available also as coated tablets at a different amount of active ingredient and also as syrup at 1%.	sachet
P0224	At orange flavour. Contains creatine monohydrate.	sachet
P0225	Contains L-Acetilcarnitine HCl. Available also as powder for os solution at the same and at a different amount of active ingredient and also as injectable solution at a different amount of active ingredient.	gastro-resistant tablet
P0226	Contains blueberry (Vaccinium myrtillus) powder and blueberry (Vaccinium myrtillus) dry extract. Available also as concentrate juice at a different amount of active ingredient.	opercula
P0227		capsule																				66
P0228	Available also at lemon or cherry flavour. Available also as bottle.	sachet																				215
P0229		sachet			1	1.2		4.5	1.4		140	0.7	160					150				150			6.25
P0230	Contains astaxanthin.	gastro-protected tablet			0.7	0.8	9.1		1			1
P0231		tablet			0.35	0.4	4.5	1.5	0.5	0.001	50				2.5							75		12.5
P0232		softgel																																				106.5	156.5
P0233		softgel																																				209	313
P0234	Contains seine dry extract.	film-coated tablet
P0235	Contains valerian root dry extract (Valeriana Officinalis L.) and hawthorn flowers and leaves powder (Crataegus oxyacantha auct.).	tablet
P0236	Contains melatonin.	retard tablet
P0237		sachet																300				200
P0238	Contains artichoke leaves dry estract (Cynara scolymus L.) and dandelion root powder (Taraxacum officinale Web.).	tablet
P0239	Contains resveratrol.	differentiated-release tablet	800		1.1	1.4	16	6	1.4	0.050	200	2.5	80	5	12		120				14	56.25	1	55	10	0.150	2				50	40
P0240	At orange flavour. Contains fructoligosaccharides, lycopene, blueberry dry extract.	sachet	1145	4143	0.61	0.45	6.5	4.11	0.958		225		72		6.4	57.9	156	1069		251	6.6	280	0.54	31	6.99		0.783
P0241	At red fruits flavour. Contains fructoligosaccharides, lycopene , blueberry dry extract.	sachet	1060	4143	0.305	0.225	3.25	2.056	0.479		112.5		36		3.2	28.95	121	534.5		125.5	3.3	140	0.27	15.5	3.495		0.392
P0242	Contains griffonia seed dry extract (Griffonia simplicifolia (Vahl ex DC.) Baill.), magnolia bark dry extract (Magnolia officinalis Rehder et Wilson), valerian root (Valeriana officinalis L.), California poppy flowering tops dry extract (Eschscholtzia californica Chamisson), perforate St John's-wort flowering tops (Hypericum perforatum ). Contains melatonin Available also as drops at a different …	tablet							0.2
P0243	Contains hawthorn leaves dry extract (Crataegus oxyacantha Medicus), blue skullcap herbs dry extract (Scutellaria lateriflora L.), linden buds dry extract (Tilia tomentosa Moench), motherwort herbs and flowers dry extract (Leonurus cardiaca L.).	chewable tablet
P0244	Contains Senna fruit dry extract (Cassia angustifolia vhal), caraway fruit dry extract (Carum carvi L.), field eryngo root dry extract (Eryngium campestre L.), peppermint leaves dry extract (Mentha x piperita L.), licorice root dry extract (Glycyrrhiza glabra L.), glossy buckthorn bark dry extract (Rhamnus frangula L.), mallow leaves dry extract (Malva sylvestris L.).	tablet
P0245	Contains lemon balm leaves dry extract (Melissa officinalis L.), lentisk resin dry extract (Pistacia lentiscus L.).	tablet															81.5					41.5
P0246	Contains oily garlic (Allium sativum L.) bulbs macerate -with refined soybean oil-, hawthorn flowers dry extracts (Crataegus oxyacantha Medicus.), mistletoe leaves dry extract (Viscum album L.) and soya bean oil partially hydrogented.	softgel
P0247	Contains black or chebulic myrobalan fruit dry extract (Terminalia chebula Retz.), Indian gooseberry fruit dry extract (Phyllantus emblica L.), belleric or bastard myrobalan fruit dry extract (Terminalia bellerica Roxb.).	capsule
P0248	Contains spirea flowering tops powder, birch leaves powder, woundwort flowering tops powder, woundwort flowering tops dry extract, mouse-ear hawkweed aereal part dry extract, mouse-ear hawkweed aereal part powder, birch leaves dry extract, spirea flowering tops dry extract, lemon peel essential oil.	tablet
P0249	Contains turmeric rhizome powder, dandelion root powder, artichoke leaves dry extract, artichoke leaves powder,arian thistle fruits dry extract, dandelion root dry extract, rosemary essential oil.	tablet
P0250	At lemon flavour. Contains cinchona bark dry extract (Cinchona succirubra Pav.), ginger rizhome dry extract (Zingiber officinalis Rosc.) and lemon essential oil.	effervescent sachet																331.95	191.6
P0251	Contains lactase (β-D-galactosidase), fermented rice starch, lemon balm leaves dry extract, fennel fruit dry extract.	bilayer tablet
P0252	Contains charcoal, fennel fruit dry extract, caraway fruit dry extract, ginger rhizome dry extract.	capsule
P0253	Contains bromelain, fermented rice starch, fennel fruit dry extract, ginger rhizome dry extract, lemon balm flowering tops dry extract,alpha-galactosidase.	tablet
P0254	Contains grapefruit seed dry extract.	capsule
P0255	Contains marine magnesium (oxide, hydroxide, sulphate, carbonate, chloride) and magnesium pidolate and citrate. Contains also fructo-oligosaccharides.	tablet																				100
P0256		tablet												10
P0257	Contains griffonia seed dry extract.	capsule
P0258	Contains melatonin.	tablet
P0259	Contains bitter melon fruit dry extract, gymnema leaves dry extract, andrographis leaves dry extract.	capsule																														40
P0260		tablet									400
P0261		tablet
P0262		capsule																							32.26
P0263	Contains goji fruit dry extract.	capsule
P0264	Contains maqui fruit dry extract.	capsule
P0265	Contains pomegranate fruit dry extract.	capsule
P0266	Contains rhodiola rosea root dry extract .	capsule
P0267	Contains cloves (Eugenia caryophyllata) powder.	capsule
P0268	Contains aged black garlic dry extracts.	capsule
P0269	Available also as powder.	capsule
P0270	Organic product. On 100 g product, Fibre 8 g .	100 g
P0271	Contains myo-inositol.	1 teaspoon
P0272		capsule
P0273	Contains wormwood (Artemisia absinthium).	capsule
P0274	Contains Lactobacillus Acidophilus R52 and Bifidobacterium lactis.	sachet
P0275	Contains soy dry extract.	tablet							1.2		200	2.5		7.5	10.9		200
P0276		tablet												5
P0277		tablet											500
P0278		softgel																																				106.5	156.5
P0279	Contains passionflower dry extract, valerian dry extract, melissa dry extract, escolzia dry weight, melatonin.	tablet
P0280	Contains vegetable charcoal and cumin seed power.	tablet
P0281	Contains green anise fruit powder (Pimpinella Anisum L.), fennel fruit powder (Foeniculum vulgare Mill), caraway fruit powder (Carum carvi L.), rheum rhizome dry extract (Rheum Officinale and Palmatum).	capsule
P0282	Contains red yeast rice titrated and phytosterols.	tablet
P0283	Contains aloe vera (Aloe barbadensis Miller) pure juice with pulpe at 100%.	100 ml
P0284	Contains hydroalcoholic extract of bearberry (Arctostaphylos uva-ursi l.).	6 ml
P0285	Contains hydroalcoholic extract of devil's claw (Harpagophytum procumbens DC).	6 ml
P0286	Contains hydroalcoholic extract of sage (Salvia officinalis l.).	6 ml
P0287	Contains hydroalcoholic extract of garlic (Allium sativum l.).	6 ml
P0288	Contains hydroalcoholic extract of chaste tree (Vitex agnus-castus l.) fruits.	6 ml
P0289	Contains hydroalcoholic extract of burdock (Arctium Lappa l.).	6 ml
P0290	Contains hydroalcoholic extract of Birch (Betula verrucosa)	6 ml
P0291	Contains hydroalcoholic extract of marigold (Calendula officinalis).	6 ml
P0292	Contains hydroalcoholic extract of artichoke (Cynara scolymus l.).	6 ml
P0293	Contains hydroalcoholic extract of milk thistle (Silybum marianum Gaertn.).	6 ml
P0294	Contains hydroalcoholic extract of Centella (Centella asiatica L.).	6 ml
P0295	Contains hydroalcoholic extract of turmeric (Curcuma longa l.).	6 ml
P0296	Contains hydroalcoholic extract of echinacea (Echinacea Angustifolia).	6 ml
P0297	Contains hydroalcoholic extract of horsetail (Equisetum maximum).	6 ml
P0298	Contains hydroalcoholic extract of erisimo (Sisymbrium officinalis Scop.).	6 ml
P0299	Contains hydroalcoholic extract of Fucus (Fucus vesiculosus L.).	6 ml
P0300	Contains hydroalcoholic extract of ginkgo biloba (Ginkgo Biloba).	6 ml
P0301	Contains hydroalcoholic extract of red ginseng (Panax ginseng C.A.).	6 ml
P0302	Contains hydroalcoholic extract of lemon balm (Melissa officinalis l.).	6 ml
P0303	Contains hydroalcoholic extract of blueberry (Vaccinium myrtillus l.).	6 ml
P0304	Contains hydroalcoholic extract of olive tree (Olea europea.	6 ml
P0305	Contains hydroalcoholic extract of pPassion flower (Passiflora incarnata l.).	6 ml
P0306	Contains hydroalcoholic extract of hawkweed (Hieracium pilosella l.).	6 ml
P0307	Contains hydroalcoholic extract of black currant (Ribes Nigrum l.).	6 ml
P0308	Contains hydroalcoholic extract of asplenium ceterach (Ceterach officinarum DC).	6 ml
P0309	Contains hydroalcoholic extract of dandelion (Taraxacum officinalis DC.).	6 ml
P0310	Contains hydroalcoholic extract of cat's claw (Uncaria tomentosa).	6 ml
P0311	Contains hydroalcoholic extract of valerian (Valeriana officinalis l.).	6 ml
P0312	Contains licorice root dry extract (Glycyrrhiza glaba L.), plantain leaves dry extract (Plantago major L.), chamomile flowers dry extracts (Matricaria recutita Rausch), nettle aerial parts (Urtica dioica L.), methylsulfonylmethane (MSM).	tablet						3					40																									5.4	8.2
P0313	Contains Inulin (100%)	5 g
P0314	Contains fennel powder (Foeniculum vulg.M.var.dulce DC), fennel oil extract, star anise powder, star anise oil extract, vegetable charcoal.	tablet
P0315	Contains devil's claw root extract (Harpagophytum procumbens DC).	capsule											12
P0316	Contains roseroot root (Rhodiola rosea L.).	capsule																				39.2
P0317	Contains ginseng root dry extract (Panax Ginseng CA Meyer).	softgel
P0318	Contains maca root (Lepidium meyenii Walp) extract.	tablet
P0319	Contains green tea leaves extracts (Camellia sinensis L. Kuntze) and guarana seed extract (Paullinia cupana Kunt).	capsule
P0320	Contains royal jelly.	softgel
P0321	Contains blackcurrants leaves extract (Ribes Nigrum L.), red grape leaves extract (Vitis vinifera L.).	capsule
P0322	Contains vegetable activated charcoal.	tablet
P0323	Contains pineapple (Ananas sativa) jambs powder.	opercola
P0324	Contains turmeric root extract (Curcuma Longa L.), black pepper (Piper nigrum L.) fruit extract.	tablet
P0325	Contains total concentrate root burdock -burdock root powder (Arctium Lappa l.) and burdock (Arctium Lappa l.) dry extract-.	opercola
P0326	Contains fluid concentrate birch leaves -hydroalcoholic extract of Birch leaves (Betula verrucosa) and Birch leaves (Betula verrucosa) dry extract- .	2 ml
P0327	Contains devil's claw root powder (Harpagophytum procumbens DC) and Devil's claw root dry extract (Harpagophytum procumbens DC).	opercola
P0328	Contains devil’s claw root powder (Harpagophytum procumbens DC) and devil’s claw root dry extract (Harpagophytum procumbens DC).	tablet
P0329	Contains garlic bulb powder (Allium sativum L.) and garlic bulb dry extract (Allium sativum L.).	capsule
P0330	Contains pineapple blade powder (Ananas comosus L.), pineapple blade dry extract (Ananas comosus L.), bromelain.	tablet
P0331	Contains centella herb powder (Centella Asiatica L.), centella herb dry extract (Centella Asiatica L.).	tablet
P0332	Contains algae spirulina (Spirulina platensis (Gomont) Geitier).	tablet
P0333	Contains dandelion root powder (Taraxacum Officinale Weber), dandelion root dry extract (Taraxacum Officinale Weber).	tablet
P0334	Contains caraway fruit dry extract (Carum carvi L.), tfennel fruit dry extract (Foeniculum vulgare Mill.), mint leaves dry extract (Mentha piperita L.).	tablet
P0335	Contains alga fucus thallus dry extract (Fucus vesiculosus L. ).	tablet
P0336	Contains ginkgo biloba leaves powder (Ginkgo biloba L.), ginkgo biloba leaves (Ginkgo biloba L.).	tablet
P0337	Contains green Tea (Camellia sinensis L. Kuntze) leaves dry extract and green tea (Camellia sinensis L. Kuntze) powder.	capsule
P0338	Contains uncaria bark (Uncaria tomentosa (Willd.) DC.) dry extract and uncaria bark ( Uncaria tomentosa (Willd.) DC.) powder.	capsule
P0339	Contains greek hay seed (Trigonella foenum-graecum L.) dry extract.	capsule
P0340	Contains fennel fruit (Foeniculum vulgare Mill.) dry extract and fennel fruit (Foeniculum vulgare Mill.) powder.	capsule
P0341	Contains ginger rhizome (Zingiber officinalis Roscoe) dry extract and ginger rhizome powder (Zingiber officinalis Roscoe).	capsule
P0342	Contains valerian root (Valeriana officinalis L.) dry extract and valerian root (Valeriana officinalis L.) powder.	capsule
P0343	Contains maca root (Lepidium meyenii Walp.) and inulin.	capsule
P0344	Contains lemon balm leaves dry extract (Melissa officinalis L.) and lemon balm leaves (Melissa officinalis L.) powder.	capsule
P0345	Contains millet fruit (Panicum miliaceum L.) dry extract and inulin.	capsule
P0346	Contains passiflora leaves (Passiflora incarnata L.) dry extract and passiflora leaves (Passiflora incarnata L.) powder.	capsule
P0347	Contains garcinia fruit (Garcinia cambogia Desr.) dry extract and inulin.	capsule
P0348	Contain garlic bulbs (Allium sativum L.) powder and garlic bulb (Allium sativum L.) dry extract.	capsule
P0349	Contains claw root (Harpagophytum procumbens (Burch.) DC.) dry extract and claw root (Harpagophytum procumbens (Burch.) DC.) powder.	capsule
P0350	Contains milk thistle fruits (Silybum marianum (L.) Gaertn.) dry extract and inulin .	capsule
P0351	Contains birch leaves (Betula pendula Roth.) dry extract and birch leaves (Betula pendula Roth.) powder.	capsule
P0352	Contains centella aereal part (Centella Asiatica L.) dry extract and Centella aereal part (Centella Asiatica L.) powder.	capsule
P0353	Contains hawthorn leaves and flowers (Crataegus monogyna Jacq.) dry extract and hawthorn leaves and flowers powder.	capsule
P0354	Contains resin dry extract of Boswellia serrata, -Incense- (Boswellia serrata Roxb. Ex Colebr.) and inulin.	capsule
P0355	Contains damiana leaves (Turnera diffusa Willd. Ex Schult.) dry extract and damiana leaves (Turnera diffusa Willd. Ex Schult.) powder.	capsule
P0356	Contains echinacea root (Echinacea angustifolia DC.) dry extract and echinacea root (Echinacea angustifolia DC.) powder.	capsule
P0357	Contains eleutherococcus root (Eleutherococcus senticosus Rupr. et Maxim.) dry extract and eleutherococcus root powder.	capsule
P0358	Contains horsetail sterile stems dry extract (Equisetum arvense L.) and horsetail sterile stems (Equisetum arvense L.) powder.	capsule
P0359	Contains grass of wheat young leaves (Triticum aestivum L.) powder (organic ingredient).	capsule
P0360	Contains griffonia seed (Griffonia simplicifolia (DC.) Baill.) dry extract and inulin.	capsule
P0361	Contains spirulina powderand klamath powder.	tablet
P0362	Contains powder of apple vinegar.	capsule
P0363	Contains griffonia seed (Griffonia simplicifolia (DC.) Baill.) dry extract.	capsule
P0364	Contains garlic (Allium sativum L.) bulbs dry extract.	capsule
P0365	Contains garlic (Allium sativum L.) bulbs dry extract, mistletoe (Viscum Album L.) leaves powder, whitethorn flowers and leaves (Crataegus monogyna Jacq.) dry extract, whitethorn flowers and leaves (Crataegus monogyna Jacq.) powder.	capsule
P0366	Contains alga Fucus thallus (Fucus vesiculosus L.) powder and alga Fucus thallus (Fucus vesiculosus L.) dry extract.	capsule
P0367	Contains pineapple (Ananas comosus L.) stems dry extract and bromelain from pineapple.	divisible tablet
P0368	Contains devil’s claw roots (Harpagophytum procumbens DC) dry extract.	capsule
P0369	Contains burdock (Arctium Lappa l.) dry extract.	capsule
P0370	Contains vegetable activated charcoal.	tablet
P0371	Contains cranberry dry extract.	capsule
P0372	Contains horsetail (Equisetum arvense L.) dry extract and horsetail (Equisetum arvense L.) powders.	capsule
P0373	Contains greek hay seed (Trigonella foenum-graecum L.) dry extract and greek hay seed (Trigonella foenum-graecum L.) powder.	capsule
P0374	Contains reishi (Ganoderma lucidum (curtis) p. Karst.) sporophore dry extract, cordyceps (Paecylomices hepiali, Chen) sporophore dry extract, maitake (Grifola forndosa, dicks.) sporophore dry extract.	capsule
P0375	Contains camboge tree fruit (Garcinia cambogia (Gaernt) Desr.) dry extract.	capsule
P0376	Contains ginkgo (Ginkgo biloba L.) leaves powder, ginkgo (Ginkgo biloba L.) leaves dry extract.	capsule
P0377	Contains glucomannan powder from root of Amorphophallus konjac.	capsule
P0378	Contains soursop (Annona muricata) fruit dry extract.	capsule
P0379	Contains griffonia (Griffonia simplicifolia (Vahl ex DC.) Baill.) seeds.	capsule
P0380	Contains gymnema (Gymnema sylvestre) leaves,gymnema (Gymnema sylvestre) leaves dry extract.	capsule
P0381	Contains blueberry dry extract .	capsule
P0382	Contains artichoke (Cynara scolymus L.) leaves dry extract, taraxacum (Taraxacum officinale Web.) root dry extract.	capsule
P0383	Contains cat’s claw (Uncaria tomentosa) bark powder and cat’s claw (Uncaria tomentosa) bark dry extract.	capsule
P0384	Contains valerian root (Valeriana officinalis) powder , valerian root (Valeriana officinalis) dry extract.	capsule
P0385	Contains ginger rhizome (Zingiber officinalis Rosc.) dry extract, ginger rhizome (Zingiber officinalis Rosc.) powder.	capsule
P0386		tablet											45								10.5
P0387		tablet			0.7	0.8	9		1		150	0.75	45								10.5		0.6
P0388		tablet									400
P0389	Contains kamu kamu fruit (Myrciaria dubia) dry extract.	tablet
P0390		sachet																114
P0391	Contains soy extract rich in lecithin.	softgel
P0392	Contains Brewer’s yeast (Saccharomyces cerevisiae) powder.	tablet
P0393		tablet																				446.40
P0394		tablet																							6.250
P0395	Contains klamath algae powder (Aphanizomenon flos-aquae).	100 g
P0396	Contains turmeric root dry extract (Curcuma Longa L.) and black pepper (Piper nigrum L.) dry extract.	capsule
P0397	Contains pineapple (Bromelia ananas) stem dry extract, butcher's broom (Ruscus Aculeatus L.) rhizome dry extract, centella (Centella asiatica) leaves extract.	tablet
P0398	Contains dog rose (Rosa canina L.) fruits dry extract, black cranberry (Vaccinium myrtillus L.) fruits dry extract, Mexican marigold (Tagetes erecta) dry extract, red grapes (Vitis vinifera L.) leaves dry extracts.	tablet
P0399	Contains hawkweed whole plant (Hieracium pilosella) dry extract, goldenrod (Solidago Virga aurea) top flowering dry extract.	tablet																68.3				30
P0400	Contains pilosella whole plant (Hieracium pilosella L. Fam. Compositae).	capsule
P0401	Contains devil's claw (Harpagophytum procumbens D.C.) root powder and devil's claw (Harpagophytum procumbens D.C.) root dry extract.	tablet
P0402	Contains chaste tree (Vitex agnus-castus L.) fruit powder and chaste tree (Vitex agnus-castus L.) fruit dry extract.	tablet
P0403	Contains boswellia (Boswelia serrata Roxb) -Incense- powder and boswellia (Boswelia serrata Roxb.)-Incense- dry extract.	tablet
P0404	Contains artichoke (Cynara scolymus L.) leaves powder and artichoke (Cynara scolymus L.) leaves dry extract.	tablet
P0405	Contains milk thistle (Silybum marianum Gaernt.) aereal parts powder and milk thistle (Silybum marianum Gaernt.) aereal parts dry extract.	tablet
P0406	Contains Centella (Centella asiatica L.) leaves powder.	tablet
P0407	Contains chrysanthellum (Chrysanthellum americanum Vatke) aereal parts powder and Chrysanthellum (Chrysanthellum americanum Vatke) aereal parts dry extract.	tablet
P0408	Contains turmeric (Curcuma longa L.) rhizome powder, turmeric (Curcuma longa L.) rhizome dry extract, long pepper (Piper longum L.) fruit powder.	capsule
P0409	Contains tick-trefoil (Desmodium ascendens D.C.) leaves powder.	tablet
P0410	Contains echinacea (Echinacea angustifolia D.C.) root powder and echinacea (Echinacea angustifolia D.C.) root dry extract.	tablet
P0411	Contains equiseto (Equisetum arvense L.) aereal parts powder and equiseto (Equisetum arvense L.) aereal parts dry extract.	tablet
P0412	Contains fucus (Fucus vesiculosus L.) thallus powder and fucus (Fucus vesiculosus L.) thallus dry extract.	tablet
P0413	Contains ginkgo biloba (Ginkgo Biloba L.) leaves powder and ginkgo biloba (Ginkgo Biloba L.) leaves dry extract.	tablet
P0414	Contains griffonia (Griffonia simplicifolia) seed dry extract.	tablet
P0415	Contains perforate St John's-wort (Hypericum perforatum L.) flowers dry extract, perforate St John's-wort (Hypericum perforatum L.) flowers powder, chicory (Cichorium intybus L.) root powder.	tablet
P0416	Contains organic blueberry (Vaccinium myrtillus L.) powder, organic blueberry (Vaccinium myrtillus L.) dry extract.	tablet
P0417	Contains nopal (Opuntia Ficus indica Miller) shovel powder.	tablet
P0418	Contains passion flower (Passiflora incarnata l.) leaves and flower powder and passion flower (Passiflora incarnata l.) leaves and flower dry extract.	tablet
P0419	Contains pau d’arco (Tabebuia avellanedae Lorenz.) bark powder.	tablet
P0420	Contains black pepper (Piper nigrum L.) fruit dry extract.	capsule
P0421	Contains willow (Salix alba L.) cortex powder and willow (Salix alba L.) bark dry extract.	tablet
P0422	Contains organic goldenrod (Solidago virga aurea L.) aereal parts powder.	capsule
P0423	Contains dandelion (Taraxacum officinale Web.) root powder and dandelion (Taraxacum officinale Web.) root dry extract.	tablet
P0424	Contains green tea (Camellia Sinensis L.) leaves powder and green tea (Camellia Sinensis L.) leaves dry extract.	tablet
P0425	Contains cat's claw (Uncaria tomentosa Willd.) root powder and cat's claw (Uncaria tomentosa Willd.) root dry extract.	tablet
P0426	Contains ashwagandha (Withania somnifera L. Dunal) root dry extract and ashwagandha (Withania somnifera L. Dunal) root powder.	tablet
P0427	Contains propolis dry extract, dog rose (Rosa canina L.) cinorroids, erisimo (Sisymbrium officinale) aereal parts powder, myrrh (Commiphora myrrha ) -gum resin- powder.	tablet
P0428	Contains hydroalcoholic extract of organic propolis.	drop
P0429	Contains water extract of propolis.	drop
P0430	Contains açai (Euterpe oleracea Mart.) fruits dry extract.	tablet
P0431	Contains andrographis (Andrographis paniculata Nees.) aereal parts dry extract.	tablet
P0432	Contains chinese angelica (Angelica sinensis (Oliv.) Diels) root dry extract.	tablet
P0433	Contains devil's claw (Harpagophytum procumbens DC.) root dry extract.	tablet
P0434	Contains astragalus (Astragalus membranaceus Bunge) root dry extract.	tablet
P0435	Contains bacopa (Bacopa monnieri (L.) Wettst.) leaves dry extract.	tablet
P0436	Contains hawthorn (Crataegus laevigata (Poir.) DC.) leaves and flowers dry extract.	tablet
P0437	Contains boswellia (Boswellia serrata Roxb.) resin gum dry extract.	tablet
P0438	Contains green coffee (Coffea canephora Pierre ex A.Froehner =C. robusta L. Linden) seed dry extract.	tablet
P0439	Contains artichoke (Cynara scolymus L.) leaves dry extract.	tablet
P0440	Contains milk thistle (Silybum marianum (L.) Gaertn.).	tablet
P0441	Contains centella (Centella asiatica (L.) Urban) aereal parts dry extract.	tablet
P0442	Contains chrysanthellum (Chrysanthellum indicum DC.) aereal parts dry extract.	tablet
P0443	Contains black cohosh (Cimicifuga racemosa (L.) Nutt.) root dry extract.	tablet
P0444	Contains poor man's ginseng (Codonopsis pilosula (Franch.) Nannf.) root dry extract.	tablet
P0445	Contains turmeric (Curcuma longa L.) root dry extract.	tablet
P0446	Contains echinacea (Echinacea angustifolia DC.) whole plant dry extract.	tablet
P0447	Contains eleutherococcus (Eleutherococcus senticosus Maxim.) root dry extract.	tablet
P0448	Contains equiseto (Equisetum arvense L.) aereal parts dry extract.	tablet
P0449	Contains escolzia (Eschscholtzia californica Cham.) aereal parts dry extract.	tablet
P0450	Contains fennel (Foeniculum vulgare Mill.) fruits dry extract.	tablet
P0451	Contains fucus (Fucus vesiculosus L.) algae dry extract.	tablet
P0452	Contains ginkgo (Ginkgo biloba L.) leaves dry extract.	tablet
P0453	Contains ginseng (Panax ginseng C.A. Meyer) root dry extract.	tablet
P0454	Contains guaranà (Paullinia sorbilis Mart. ) seed dry extract.	tablet
P0455	Contains lemon balm (Melissa officinalis L.) leaves dry extract.	tablet
P0456	Contains blueberry (Vaccinium myrtillus L.) dry extracts.	tablet
P0457	Contains feverfew (Tanacetum parthenium (L.) Schultz-Bip.) aereal parts dry extract.	tablet
P0458	Contains polygonum (Polygonum multiflorum Thunb.) root dry extract.	tablet
P0459	Contains grapefruit (Citrus paradisiMacfad.) seed dry extract.	tablet
P0460	Contains stone breaker (Phyllanthus niruri L.) leaves and flowers dry extract.	tablet
P0461	Contains Garcinia (Garcinia gummi-gutta (L.) Roxb. = G. cambogia (Gaertn.) Desr.) fruits dry extract.	tablet
P0462	Contains jujube red date (Ziziphus jujuba Mill.) seeds dry extract.	tablet
P0463	Contains goji (Lycium barbarum L.) fruits dry extract.	tablet
P0464	Contains grindelia (Grindelia camporum Greene = G. robusta Nutt.) flowering tops dry extracts.	tablet
P0465	Contains gymnema (Gymnema sylvestre R. Br.) leaves dry extract.	tablet
P0466	Contains jiaogulan (Gynostemma pentaphyllum (Thunb.) Makino) aereal parts dry extract.	tablet
P0467	Contains baical skullcap (Scutellaria baicalensis Georgi) root dry extract.	tablet
P0468	Contains schisandra (Schisandra chinensis (Turcz.) Baill.) fruit dry extract.	tablet
P0469	Contains chinese sage (Salvia miltiorrhiza Bunge) root dry extract.	tablet
P0470	Contains saw palmetto (Serenoa repens(Bartram) Small) fruit dry extract.	tablet
P0471	Contains pink trumpet tree (Tabebuia impetiginosa(Mart. ex DC.) Standl.) bark.	tablet
P0472	Contains dandelion (Taraxacum officinale Weber) root dry extract.	tablet
P0473	Contains cat's claw (Uncaria tomentosa DC.) bark dry extract.	tablet
P0474	Contains red grapevines (Vitis vinifera L.) leaves dry extract.	tablet
P0475	Contains ashwagandha (Withania somnifera L. Dunal) root dry extract.	tablet
P0476	Contains maca (Lepidium meyenii Walp.) root dry extract.	tablet
P0477	Contains magnolia (Magnolia officinalis Rehd. et E.H. Wilson) bark dry extract.	tablet
P0478	Contains pomegranate (Punica granatum L.) fruit dry extract.	tablet
P0479	Contains passion flower (Passiflora incarnata L.) pianta fiorita dry extract.	tablet
P0480	Contains long pepper (Piper longum L.) fruit dry extract.	tablet
P0481	Contains rhodiola (Rhodiola rosea L.) root dry extract.	tablet
P0482	Contains rooibos (Aspalathus linearis (Burman f.) R. Dahlgren) leaves dry extract.	tablet
P0483	Contains butcher's broom (Ruscus aculeatus L.) root dry extract.	tablet
P0484	Contains triphala (Phyllanthus emblica L., Terminalia bellirica (Gaertn.) Roxb., Terminalia chebula Retz.) fruit dry extract.	tablet
P0485	Contains shatavari (Asparagus racemosus Willd.) root dry extract.	tablet
P0486	Contains bearberry (Arctostaphylos uva-ursi (L.) Spreng.) leaves dry extract.	tablet
P0487	Contains tulsi or holy basil (Ocimum tenuiflorum L. =O. sanctum L.) leaves dry extract.	tablet
P0488	Contains valerian (Valeriana officinalis L.) rhizome dry extract.	tablet
P0489	Contains ginger (Zingiber officinale Roscoe) rhizome dry extract.	tablet
P0490	Contains ascophyllum nodosum and fucus vesiculosus.	hard capsule																								0.075						7.5
P0491	Contains Griffonia (Griffonia simplicifolia (DC) Baill.) seeds dry extract and Parthenium (Tanacetum parthenium (L.) Sch. Bip.) flowers dry extract. Available also as tablets at a different amount of active ingredients	sachet																				100
P0492	At orange flavour. Contains creatinine and carnitine.	sachet											60		10			300			14	150		55
P0493	Contains Bilberry dry extract.	capsule											60
P0494	Contains Valeriana roots dry extract.	capsule
P0495	Contains pomegranate concentrated juice. Contains salt.	20 mL																						55
P0496	Available also at peach flavour and strawberry and raspberry flavour. Contains green Coffee not roasted seeds dry extract.	capsule
P0497	Contains pineapple (Ananas sativa L.) jambs powder .	capsule
P0498	Contains organic pineapple (Ananas cosmosus) jambs dry extract.	capsule
P0499	Contains boswellia (Boswellia serrata Roxb.) resin gum dry extract, willow (Salix alba L.), equiseto (Equisetum arvense L.) aereal parts dry extract, ginger rhizome (Zingiber officinalis Rosc.).	tablet											80
P0500	Contains common hops (Humulus lupulus L.) flower extract, valerian (Valeriana officinalis L.) root extract, Licorice (Glycyrrhiza glabra L.) root dry extract.	tablet																				150
P0501	Contains dehydrated juice concentrate of carrot (Daucus carota L.).	capsule
P0502	Contains wild yam root dry extract.	tablet
P0503	Contains dog rose (Rosa canina L.) fruits (rosehip) micronized powder.	tablet
P0504	Contains uncaria bark (Uncaria tomentosa (Willd.DC.) micronized powder.	tablet
P0505	Contains dandelion root dry extract (Taraxacum Officinale Weber) and artichoke leaves (Cynara scolymus L.).	tablet
P0506	Contains fucus (Fucus vesiculosus L.) thallus micronized powder.	tablet
P0507	Contains spirulina (Spirulina platensis) powder.	tablet
P0508	Contains green tea leaves extracts (Camellia sinensis L. Kuntze).	capsule
P0509	Contains equiseto aereal parts (Equisetum arvense L.).	capsule
P0510	Contains guaranà (Paullinia cupana Kunth.) seed dry extract.	capsule
P0511	Contains devil's claw (Harpagophytum procumbens DC.) micronised powder.	capsule
P0512	Contains bean pod dry extract.	tablet
P0513	Contains hawthorn leaves and flowers (Crataegus monogyna Jacq.) powder.	capsule
P0514	Contains artichoke leaves (Cynara scolymus L.) dry extract.	capsule
P0515	Contains fennel seed (Foeniculum vulgare Mill.) micronized powder.	capsule
P0516	Contains mallow leaves and flowers (Malva sylvestris L.) powder.	capsule
P0517	Contains dandelion root (Taraxacum Officinale Weber) dry extract.	capsule
P0518	Contains curcuma (Curcuma longa L.) rhizome dry extract.	capsule
P0519	Contains echinacea (Echinacea Angustifolia DC) dry extract, astragalus (Astragalus membranaceus Bung.) root dry extract, acerola dry extract fruits, and quercetin.	capsule
P0520	Contains carrot (Daucus carota L.) root dry extract, marigold (Calendula officinalis) flowers dry extract, acerola fruit dry extract, grape seed dry extract.	capsule		5000
P0521	Contains horsetail sterile stems dry extract (Equisetum arvense L.) and horsetail sterile stems (Equisetum arvense L.) powder.	opercola
P0522	Contains açai (Euterpe oleracea Mart.) fruit dry extract.	opercola
P0523	Contains acerola (Malpighia punicifolia L.) fruit dry extract.	opercola
P0524	Contains garlic bulb powder (Allium sativum L.) and garlic bulb dry extracted (Allium sativum L.).	opercola
P0525	Contains pineapple (Ananas sativa L.) jambs dry extract and pineapple (Ananas sativa L.) jambs powder.	opercola
P0526	Contains bitter orange (Citrus × aurantium) peel dry extract.	opercola
P0527	Contains devil's claw root dry extract (Harpagophytum procumbens DC) and devil's claw root powder (Harpagophytum procumbens DC).	opercola
P0528	Contains burdock root dry extract (Harpagophytum procumbens DC) and burdock root powder (Arctium lappa L.).	opercola
P0529	Contains birch leaves dry extract (Betulla Alba Roth.) and birch leaves powder (Betulla Alba Roth).	opercola
P0530	Contains hawthorn leaves and flowers (Crataegus monogyna Jacq.) dry extract and hawthorn leaves and flowers powder.	opercola
P0531	Contains green coffee (Coffea arabica L.) seed dry extract and green coffee (Coffea arabica L.) seed powder.	opercola
P0532	Contains artichoke leaves (Cynara scolymus L.) dry extract and artichoke leaves (Cynara scolymus L.) powder.	opercola
P0533	Contains milk thistle (Silybum marianum Gaernt.) fruits dry extract and milk thistle (Silybum marianum Gaernt.) fruits powder.	opercola
P0534	Contains carrot (Daucus carota L.) root dry extract and carrot (Daucus carota L.) root powder.	opercola
P0535	Contains centella aereal parts (Centella Asiatica L.) dry extract and centella aereal parts (Centella Asiatica L.) powder.	opercola
P0536	Contains turmeric (Curcuma longa L.) rhyzome dry extract and turmeric (Curcuma longa L.) rhyzome powder.	opercola
P0537	Contains damiana leaves (Turnera aphrodisiaca) dry extract and damiana leaves (Turnera aphrodisiaca) powder.	opercola
P0538	Contains echinacea root (Echinacea angustifolia DC.) dry extract and echinacea root (Echinacea angustifolia DC.) powder.	opercola
P0539	Contains horsetail sterile stems dry extract (Equisetum arvense L.) and horsetail sterile stems (Equisetum arvense L.) powder.	opercola
P0540	Contains bean (Phaseolus vulgaris L.) pod dry extract and bean (Phaseolus vulgaris L.) pod powder.	opercola
P0541	Contains greek hay seed (Trigonella foenum-graecum L.) dry extract (1:4) and greek hay seed (Trigonella foenum-graecum L.) powder.	opercola
P0542	Contains fennel fruit (Foeniculum vulgare Mill.) dry extract and fennel fruit (Foeniculum vulgare Mill.) powder.	opercola
P0543	Contains ginkgo biloba leaves (Ginkgo biloba L.) dry extract and ginkgo biloba leaves powder (Ginkgo biloba L.).	opercola
P0544	Contains griffonia seed (Griffonia simplicifolia (DC.) Baill.) dry extract and griffonia seed (Griffonia simplicifolia (DC.) Baill.) powder.	opercola
P0545	Contains maca (Lepidium meyenii Walp.) root dry extract and maca (Lepidium meyenii Walp.) root powder.	opercola
P0546	Contains lemon balm leaves dry extract (Melissa officinalis L.) and lemon balm leaves (Melissa officinalis L.) powder.	opercola
P0547	Contains passiflora flowerings tops (Passiflora incarnata L.) dry extract and passiflora flowering top (Passiflora incarnata L.) powder.	opercola
P0548	Contains roseroot root (Rhodiola rosea L.) dry extract and roseroot root (Rhodiola rosea L.).	opercola
P0549	Contains dog rose (Rosa canina L.) cinorroids dry extract and dog rose (Rosa canina L.) powder.	opercola
P0550	Contains willow (Salix alba L.) bark dry extract and willow (Salix alba L.) cortex powder.	opercola
P0551	Contains dandelion (Taraxacum officinale) root dry extract and dandelion (Taraxacum officinale) root powder.	opercola
P0552	Contains green tea leaves dry extract (Camellia sinensis L. Kuntze) and green tea leaves extracts (Camellia sinensis L. Kuntze) powder.	opercola
P0553	Contains clover (Trifolium pratense L.) dry extract and clover (Trifolium pratense L.) powder.	opercola
P0554	Contains cat’s claw (Uncaria tomentosa) bark dry extract and cat’s claw (Uncaria tomentosa) bark powder .	opercola
P0555	Contains valerian root (Valeriana officinalis L.) dry extract and valerian root (Valeriana officinalis L.) powder.	opercola
P0556		tablet																300				271,5
P0557		sachet									400							300				300			10
P0558	Contains Lactobacillus rhamnosus, Saccharomyces cerevisiae var. boulardii.
[truncated: 35 more columns]

## Sheet: TS2
ID	Foodex2 rev 2 Code	Comments of coder	Re-Coded
P0001	A03SN#F03.A06JH$F04.A0EVN$F33.A0C16	The ingredient indicated as carotenoids is lutein.	Combination of vitamin and mineral only supplements, STATE= Tablets, INGRED= Carotenoids, LEGIS= FA-17.1 Food supplements supplied in a solid form including capsules and tablets and similar forms, excluding chewable forms
P0002	A03SN#F04.A0EVN	The ingredient indicated as carotenoids is lutein.	Combination of vitamin and mineral only supplements, INGRED= Carotenoids
P0003	A03SN#F04.A06QE$F04.A06SV$F23.A07TL$F33.A0C14	The target consumers indicated as children food are children aged from 4 year.	Combination of vitamin and mineral only supplements, INGRED= Lemon flavour, INGRED= Raspberry flavour, TARGCON= Children food, LEGIS= FA-17.3 Food supplements supplied in a syrup-type or chewable form
P0004	A03SC#F04.A0EVG$F04.A0EVF		Carnitine or creatine-based supplement for sports people, INGRED= Vitamins, INGRED= Chemical elements
P0005	A03TC#F04.A0ETZ$F04.A0EVG$F04.A0EVF$F23.A07TL	The ingredient indicated as powdered extract of plant origin is echinacea dry extract. Amino acids and barbados cherry are also contained. The target consumers indicated as children food are children aged from 4 year.	Mixed supplements/formulations, INGRED= Powdered extract of plant origin, INGRED= Vitamins, INGRED= Chemical elements, TARGCON= Children food
P0006	A03SM#F03.A06JH$F04.A0EXF$F33.A0C16		Mineral only supplements, STATE= Tablets, INGRED= Magnesium, LEGIS= FA-17.1 Food supplements supplied in a solid form including capsules and tablets and similar forms, excluding chewable forms
P0007	A03SN#F04.A0ETY$F33.A0C16	The ingredient indicated as extracts of plant origin is ginseng concentrated extracts.	Combination of vitamin and mineral only supplements, INGRED= Extracts of plant origin, LEGIS= FA-17.1 Food supplements supplied in a solid form including capsules and tablets and similar forms, excluding chewable forms
P0008	A03TC#F03.A06JH$F04.A0ETZ$F04.A0EXZ$F04.A0EXL$F33.A0C16	The ingredient indicated as powdered extract of plant origin is blueberry dry extract.	Mixed supplements/formulations, STATE= Tablets, INGRED= Powdered extract of plant origin, INGRED= Vitamin A (retinol, carotenoids), INGRED= Vitamin E (tocopherols, tocotrienols), LEGIS= FA-17.1 Food supplements supplied in a solid form including capsules and tablets and similar forms, excluding chewable forms
P0009	A03SV#F03.A06JH$F04.A0F4M$F33.A0C16	The ingredient indicated as Co-factors of metabolism is α-lipoic acid.	Other common supplements, STATE= Tablets, INGRED= Co-factors to metabolism, LEGIS= FA-17.1 Food supplements supplied in a solid form including capsules and tablets and similar forms, excluding chewable forms
P0010	A03SA#F33.A0C16		Protein and protein components for sports people, LEGIS= FA-17.1 Food supplements supplied in a solid form including capsules and tablets and similar forms, excluding chewable forms
P0011	A03SN#F33.A0C16		Combination of vitamin and mineral only supplements, LEGIS= FA-17.1 Food supplements supplied in a solid form including capsules and tablets and similar forms, excluding chewable forms
P0012	A03SC#F04.A0F4N$F04.A0F4P$F04.A0EVG$F04.A0EVF	The ingredient indicated as creatine-creatinine is creatine . Carnosine is also contained.	Carnitine or creatine-based supplement for sports people, INGRED= Carnitine, INGRED= Creatine-creatinine, INGRED= Vitamins, INGRED= Chemical elements
P0013	A03SC#F04.A0F4N$F04.A0F4P$F04.A0EVG$F04.A0EVF	The ingredient indicated as creatine-creatinine is creatinine . Taurine is also contained.	Carnitine or creatine-based supplement for sports people, INGRED= Carnitine, INGRED= Creatine-creatinine, INGRED= Vitamins, INGRED= Chemical elements
P0014	A03TC#F04.A0EVT$F04.A0ETZ$F04.A036T$F04.A0EVN$F33.A0C16	The ingredient indicated as Special fatty acids is gamma linolenic acid.The ingredient indicated as Powdered extract of plant oriogin is pineapple dry extract. The ingredient indicated as Plant oil is evening primrose oil.	Mixed supplements/formulations, INGRED= Omega-6 fatty acids, INGRED= Powdered extract of plant origin, INGRED= Seed oils, INGRED= Carotenoids, LEGIS= FA-17.1 Food supplements supplied in a solid form including capsules and tablets and similar forms, excluding chewable forms
P0015	A03TC#F04.A0EXN$F04.A0EXL$F04.A0EVZ$F04.A0F4N$F04.A0F4M$F04.A0ETZ	The ingredient indicated as co-factors is coenzyme Q10. The ingredient indicated as extract of plant origin is Eleutherococcus dry extract.	Mixed supplements/formulations, INGRED= Vitamin C (ascorbic acid), INGRED= Vitamin E (tocopherols, tocotrienols), INGRED= Selenium, INGRED= Carnitine, INGRED= Co-factors to metabolism, INGRED= Powdered extract of plant origin
P0016	A03SN#F04.A0ETZ$F33.A0C16		Combination of vitamin and mineral only supplements, INGRED= Powdered extract of plant origin, LEGIS= FA-17.1 Food supplements supplied in a solid form including capsules and tablets and similar forms, excluding chewable forms
P0017	A03SL#F04.A0EXN		Vitamin only supplements, INGRED= Vitamin C (ascorbic acid)
P0018	A03SM#F03.A06JH$F04.A0EXD$F33.A0C16		Mineral only supplements, STATE= Tablets, INGRED= Iron, LEGIS= FA-17.1 Food supplements supplied in a solid form including capsules and tablets and similar forms, excluding chewable forms
P0019	A03SM#F03.A06JH$F04.A0EXF$F33.A0C16		Mineral only supplements, STATE= Tablets, INGRED= Magnesium, LEGIS= FA-17.1 Food supplements supplied in a solid form including capsules and tablets and similar forms, excluding chewable forms
P0020	A03SN#F33.A0C16	Methyonine, bioscaline and N -(2 aminopropyl) tetramethylenediamine-tricloro hydrate are also contained.	Combination of vitamin and mineral only supplements, LEGIS= FA-17.1 Food supplements supplied in a solid form including capsules and tablets and similar forms, excluding chewable forms
P0021	A03TC#F03.A06JH$F04.A0EVQ$F04.A0ETY$F04.A0EVZ$F33.A0C16	The ingredient indicated as phytosterols are isoflavonoids. The ingredient indicated as Extracts of plant origin is soy extract.	Mixed supplements/formulations, STATE= Tablets, INGRED= Phytosterols, INGRED= Extracts of plant origin, INGRED= Selenium, LEGIS= FA-17.1 Food supplements supplied in a solid form including capsules and tablets and similar forms, excluding chewable forms
P0022	A03TC#F03.A06JH$F04.A0EVQ$F04.A0ETY$F04.A0EXF$F33.A0C16	The ingredient indicated as phytosterols are isoflavonoids. The ingredient indicated as Extracts of plant origin is soya extract.	Mixed supplements/formulations, STATE= Tablets, INGRED= Phytosterols, INGRED= Extracts of plant origin, INGRED= Magnesium, LEGIS= FA-17.1 Food supplements supplied in a solid form including capsules and tablets and similar forms, excluding chewable forms
P0023	A03SL#F04.A0EXL		Vitamin only supplements, INGRED= Vitamin E (tocopherols, tocotrienols)
P0024	A03SM#F03.A06JL$F04.A0F3A$F33.A0C15		Mineral only supplements, STATE= Liquid, INGRED= Fluorine, LEGIS= FA-17.2 Food supplements supplied in a liquid form
P0025	A03SN#F03.A06JH$F04.A0EVN$F33.A0C16	The ingredient indicated as carotenoids is lutein.	Combination of vitamin and mineral only supplements, STATE= Tablets, INGRED= Carotenoids, LEGIS= FA-17.1 Food supplements supplied in a solid form including capsules and tablets and similar forms, excluding chewable forms
P0026	A03SL#F04.A0EXN$F33.A0C16		Vitamin only supplements, INGRED= Vitamin C (ascorbic acid), LEGIS= FA-17.1 Food supplements supplied in a solid form including capsules and tablets and similar forms, excluding chewable forms
P0027	A03SX#F04.A0EVV$F04.A0EXL$F04.A038M		Formulations containing special fatty acids (e.g. Omega-3, essential fatty acids), INGRED= Omega-3 fatty acids, INGRED= Vitamin E (tocopherols, tocotrienols), INGRED= Fish oil
P0028	A03TC#F04.A0EVG$F04.A0BXY$F33.A0C16	The ingredients indicated as Microbiological or enzymatic ingredients are microbiological ingredients, yeast and bacilli	Mixed supplements/formulations, INGRED= Vitamins, INGRED= Microbiological or enzymatic ingredients, LEGIS= FA-17.1 Food supplements supplied in a solid form including capsules and tablets and similar forms, excluding chewable forms
P0029	A03SN#F33.A0C16		Combination of vitamin and mineral only supplements, LEGIS= FA-17.1 Food supplements supplied in a solid form including capsules and tablets and similar forms, excluding chewable forms
P0030	A03SL#F04.A0EVM$F33.A0C16	The ingredient indicated as Phytochemicals is inositol.	Vitamin only supplements, INGRED= Phytochemicals, LEGIS= FA-17.1 Food supplements supplied in a solid form including capsules and tablets and similar forms, excluding chewable forms
P0031	A03TC#F03.A06JH$F04.A0EXD$F04.A0EXN$F04.A0EXQ$F04.A0EXP$F04.A0ETZ$F33.A0C16		Mixed supplements/formulations, STATE= Tablets, INGRED= Iron, INGRED= Vitamin C (ascorbic acid), INGRED= Vitamin B9 (folic acid, folinic acid), INGRED= Vitamin B12 (cyanocobalamin, hydroxocobalamin, methylcobalamin), INGRED= Powdered extract of plant origin, LEGIS= FA-17.1 Food supplements supplied in a solid form including capsules and tablets and similar forms, excluding chewable forms
P0032	A03SL#F04.A0EXN$F33.A0C16		Vitamin only supplements, INGRED= Vitamin C (ascorbic acid), LEGIS= FA-17.1 Food supplements supplied in a solid form including capsules and tablets and similar forms, excluding chewable forms
P0033	A03SB#F03.A06JH$F04.A0EVG$F04.A0EVF$F04.A0BXY$F33.A0C16	Tne ingredient indicated as Microbiological or enzymatic ingredients are microbiological ingredients, yeast.	Micronutrients supplement for sports people, STATE= Tablets, INGRED= Vitamins, INGRED= Chemical elements, INGRED= Microbiological or enzymatic ingredients, LEGIS= FA-17.1 Food supplements supplied in a solid form including capsules and tablets and similar forms, excluding chewable forms
P0034	A03TC#F04.A0ETZ$F04.A0EVN$F04.A0EXL$F04.A0EXN$F04.A0EXR$F04.A0EXB	The ingredient indicated as carotenoids is β-carotene.	Mixed supplements/formulations, INGRED= Powdered extract of plant origin, INGRED= Carotenoids, INGRED= Vitamin E (tocopherols, tocotrienols), INGRED= Vitamin C (ascorbic acid), INGRED= Vitamin B7 (biotin), INGRED= Copper
P0035	A03SM#F04.A0EXF		Mineral only supplements, INGRED= Magnesium
P0036	A0F3Y#F04.A0EVR$F04.A0BXY	The ingredient indicated as Microbiological or enzymatic ingredients are microbiological ingredients, Lactobacillus Acidophilus.	Probiotic or prebiotic formulations, INGRED= Dietary fibre, INGRED= Microbiological or enzymatic ingredients
P0037	A03SS#F04.A0BB6$F33.A0C16		Herbal formulations and plant extracts, INGRED= Aloe leaf gel (pulp), LEGIS= FA-17.1 Food supplements supplied in a solid form including capsules and tablets and similar forms, excluding chewable forms
P0038	A03SX#F04.A0EVV$F04.A038M$F33.A0C16		Formulations containing special fatty acids (e.g. Omega-3, essential fatty acids), INGRED= Omega-3 fatty acids, INGRED= Fish oil, LEGIS= FA-17.1 Food supplements supplied in a solid form including capsules and tablets and similar forms, excluding chewable forms
P0039	A03SB#F04.A0EVG$F04.A0EVF$F04.A032T$F04.A042P		Micronutrients supplement for sports people, INGRED= Vitamins, INGRED= Chemical elements, INGRED= Fructose, INGRED= Salt
P0040	A03SB#F03.A06JD$F04.A0EXY$F04.A0EXH$F04.A0EXF$F04.A06RR	Sodium is also contained.	Micronutrients supplement for sports people, STATE= Powder, INGRED= Vitamin B1 (thiamine), INGRED= Calcium, INGRED= Magnesium, INGRED= Orange flavour
P0041	A03SM#F04.A0EXJ$F04.A0EXF	Appreciable amount of chlorine is also contained.	Mineral only supplements, INGRED= Potassium, INGRED= Magnesium
P0042	A03TC#F04.A0EXY$F04.A0EXN$F04.A0EXD$F04.A0EXC$F04.A0EXE$F04.A0F4P	The ingredient indicated as Creatine-creatinine is creatine. Arginine and β-alanine are also contained.	Mixed supplements/formulations, INGRED= Vitamin B1 (thiamine), INGRED= Vitamin C (ascorbic acid), INGRED= Iron, INGRED= Manganese, INGRED= Zinc, INGRED= Creatine-creatinine
P0043	A03SN#F04.A0EXH$F04.A0EXM$F04.A06RR$F33.A0C16		Combination of vitamin and mineral only supplements, INGRED= Calcium, INGRED= Vitamin D (cholecalciferol), INGRED= Orange flavour, LEGIS= FA-17.1 Food supplements supplied in a solid form including capsules and tablets and similar forms, excluding chewable forms
P0044	A03SN#F04.A0EXH$F04.A0EXM		Combination of vitamin and mineral only supplements, INGRED= Calcium, INGRED= Vitamin D (cholecalciferol)
P0045	A03SM#F03.A06JL$F04.A0EXD$F33.A0C15		Mineral only supplements, STATE= Liquid, INGRED= Iron, LEGIS= FA-17.2 Food supplements supplied in a liquid form
P0046	A03SS#F03.A06JH$F04.A0ETZ$F04.A016T$F04.A0EXA$F04.A0EZE$F33.A0C16	The ingredients indicated as Inulin and other polyfructoses are inulin and fructo-oligosaccharides. Chrome is also contained.	Herbal formulations and plant extracts, STATE= Tablets, INGRED= Powdered extract of plant origin, INGRED= Dried herbs, INGRED= Iodine, INGRED= Inulin and other polyfructoses, LEGIS= FA-17.1 Food supplements supplied in a solid form including capsules and tablets and similar forms, excluding chewable forms
P0047	A03SL#F04.A0EXQ		Vitamin only supplements, INGRED= Vitamin B9 (folic acid, folinic acid)
P0048	A03SE#F03.A06JD$F04.A0EVG$F04.A0EVF$F04.A0BXY$F04.A0EZE$F04.A06VS$F23.A07TL	The ingredients indicated as Inulin and other polyfructoses are fructo-oligosaccharides. The ingredients indicated as Microbiological or enzymatic ingredients are bacilli. The target consumers are children aged from 1 to 10 years.	Nutritionally complete formulae, STATE= Powder, INGRED= Vitamins, INGRED= Chemical elements, INGRED= Microbiological or enzymatic ingredients, INGRED= Inulin and other polyfructoses, INGRED= Vanilla flavour, TARGCON= Children food
P0049	A03SM#F04.A0EXF$F33.A0C14		Mineral only supplements, INGRED= Magnesium, LEGIS= FA-17.3 Food supplements supplied in a syrup-type or chewable form
P0050	A03SL#F03.A06JL$F04.A0EXM$F33.A0C15		Vitamin only supplements, STATE= Liquid, INGRED= Vitamin D (cholecalciferol), LEGIS= FA-17.2 Food supplements supplied in a liquid form
P0051	A03TC#F04.A0BSK$F04.A0EZE$F04.A0BXY$F04.A0EVG$F33.A0C16	The ingredients indicated as dextrins are corn dextrins. The ingredient indicated as inulin and other polyfructoses are fructo-oligosaccharides. The ingredients indicated as Microbiological or enzymatic ingredients are yeast and bacilli.	Mixed supplements/formulations, INGRED= Dextrin, INGRED= Inulin and other polyfructoses, INGRED= Microbiological or enzymatic ingredients, INGRED= Vitamins, LEGIS= FA-17.1 Food supplements supplied in a solid form including capsules and tablets and similar forms, excluding chewable forms
P0052	A03TC#F03.A06JL$F04.A0EVG$F04.A0EVF$F04.A0F4M$F04.A0EVP$F04.A0EVN$F33.A0C15	The Ingredient indicated as co-factors to metabolism is Coenzyme Q10. The ingredients indicated as Polyphenols are bioflavonoids. The ingredient indicated as carotenoids is β-carotene. Cysteine is also contained.	Mixed supplements/formulations, STATE= Liquid, INGRED= Vitamins, INGRED= Chemical elements, INGRED= Co-factors to metabolism, INGRED= Polyphenols, INGRED= Carotenoids, LEGIS= FA-17.2 Food supplements supplied in a liquid form
P0053	A03SL#F03.A06JL$F04.A0EXP$F33.A0C15		Vitamin only supplements, STATE= Liquid, INGRED= Vitamin B12 (cyanocobalamin, hydroxocobalamin, methylcobalamin), LEGIS= FA-17.2 Food supplements supplied in a liquid form
P0054	A03SN#F03.A06JH$F33.A0C16		Combination of vitamin and mineral only supplements, STATE= Tablets, LEGIS= FA-17.1 Food supplements supplied in a solid form including capsules and tablets and similar forms, excluding chewable forms
P0055	A03SL#F03.A06JL		Vitamin only supplements, STATE= Liquid
P0056	A03SE#F03.A06JD$F04.A0EVD$F04.A0EVG$F04.A0EVF$F04.A06MF$F04.A042P		Nutritionally complete formulae, STATE= Powder, INGRED= Isolated proteins and other protein products, INGRED= Vitamins, INGRED= Chemical elements, INGRED= Chocolate flavour, INGRED= Salt
P0057	A03TC#F03.A06JL	Chondrotin, methylsulfonylmethane, glucosamine are contained.	Mixed supplements/formulations, STATE= Liquid
P0058	A03SX#F04.A0EVV$F04.A038M$F04.A0EVA	The ingredient indicated as liquid extract of plant origin is sweet orange essential oil.	Formulations containing special fatty acids (e.g. Omega-3, essential fatty acids), INGRED= Omega-3 fatty acids, INGRED= Fish oil, INGRED= Liquid extract of plant origin
P0059	A03TC#F04.A0ETZ$F04.A06RR$F04.A0CVF$F33.A0C16	The Ingredients indicated as powdered extract of plant origin are white willow dry extract and dog rose dry extract . The ingredient indicated as Other edible apiculture products is propolis dry extract.	Mixed supplements/formulations, INGRED= Powdered extract of plant origin, INGRED= Orange flavour, INGRED= Other edible apiculture products, LEGIS= FA-17.1 Food supplements supplied in a solid form including capsules and tablets and similar forms, excluding chewable forms
P0060	A03SS#F04.A0ETZ$F33.A0C16	The Ingredient indicated as powdered extract of plant origin is vitis vinifera dry extract.	Herbal formulations and plant extracts, INGRED= Powdered extract of plant origin, LEGIS= FA-17.1 Food supplements supplied in a solid form including capsules and tablets and similar forms, excluding chewable forms
P0061	A03SL#F04.A0EXL		Vitamin only supplements, INGRED= Vitamin E (tocopherols, tocotrienols)
P0062	A03TC#F04.A0ETZ$F04.A0EXL$F04.A0EVP	The ingredients indicated as powdered extract of plant origin are gotu kola dry extract and sweet clover dry extract . The ingredient indicated as Polyphenols is rutin.	Mixed supplements/formulations, INGRED= Powdered extract of plant origin, INGRED= Vitamin E (tocopherols, tocotrienols), INGRED= Polyphenols
P0063	A03SN#F03.A06JH$F04.A0EXQ$F04.A0EXH$F33.A0C16		Combination of vitamin and mineral only supplements, STATE= Tablets, INGRED= Vitamin B9 (folic acid, folinic acid), INGRED= Calcium, LEGIS= FA-17.1 Food supplements supplied in a solid form including capsules and tablets and similar forms, excluding chewable forms
P0064	A03SS#F04.A0ETY$F33.A0C16		Herbal formulations and plant extracts, INGRED= Extracts of plant origin, LEGIS= FA-17.1 Food supplements supplied in a solid form including capsules and tablets and similar forms, excluding chewable forms
P0065	A03SR#F04.A00ZS$F33.A0C16	The ingredient indicated as Starchy roots and tubers is tuber (Amorphophallus konjac).	Fiber supplements, INGRED= Starchy roots and tubers, LEGIS= FA-17.1 Food supplements supplied in a solid form including capsules and tablets and similar forms, excluding chewable forms
P0066	A03TC#F03.A06JC$F04.A0EVZ$F04.A0EXL$F04.A0EXS$F04.A042P	Soy lecithyn is also contained. The state indicated as Fragments/Granules/Splinters is granules	Mixed supplements/formulations, STATE= Fragments / granules / splinters, INGRED= Selenium, INGRED= Vitamin E (tocopherols, tocotrienols), INGRED= Vitamin B6 (pyridoxine, pyridoxamine, pyridoxal), INGRED= Salt
P0067	A03SM#F03.A06JH$F04.A0EXH$F33.A0C16		Mineral only supplements, STATE= Tablets, INGRED= Calcium, LEGIS= FA-17.1 Food supplements supplied in a solid form including capsules and tablets and similar forms, excluding chewable forms
P0068	A03SM#F03.A06JH$F04.A0EXF$F33.A0C16		Mineral only supplements, STATE= Tablets, INGRED= Magnesium, LEGIS= FA-17.1 Food supplements supplied in a solid form including capsules and tablets and similar forms, excluding chewable forms
P0069	A03SY#F04.A0EXN$F04.A0EXL$F04.A0EXB$F33.A0C16		Protein and amino acids supplements, INGRED= Vitamin C (ascorbic acid), INGRED= Vitamin E (tocopherols, tocotrienols), INGRED= Copper , LEGIS= FA-17.1 Food supplements supplied in a solid form including capsules and tablets and similar forms, excluding chewable forms
P0070	A03TB#F03.A06JH$F33.A0C16		Yeast based formulations, STATE= Tablets, LEGIS= FA-17.1 Food supplements supplied in a solid form including capsules and tablets and similar forms, excluding chewable forms
P0071	A03SN#F03.A06JH$F33.A0C16		Combination of vitamin and mineral only supplements, STATE= Tablets, LEGIS= FA-17.1 Food supplements supplied in a solid form including capsules and tablets and similar forms, excluding chewable forms
P0072	A03TB#F03.A06JH$F04.A042P$F33.A0C16		Yeast based formulations, STATE= Tablets, INGRED= Salt, LEGIS= FA-17.1 Food supplements supplied in a solid form including capsules and tablets and similar forms, excluding chewable forms
P0073	A03SL#F04.A0EXY$F04.A0EXS$F04.A0EXP$F33.A0C16		Vitamin only supplements, INGRED= Vitamin B1 (thiamine), INGRED= Vitamin B6 (pyridoxine, pyridoxamine, pyridoxal), INGRED= Vitamin B12 (cyanocobalamin, hydroxocobalamin, methylcobalamin), LEGIS= FA-17.1 Food supplements supplied in a solid form including capsules and tablets and similar forms, excluding chewable forms
P0074	A03TC#F03.A06JH$F04.A0EXQ$F04.A0EXN$F04.A0EXA$F04.A02PR$F33.A0C16	The ingredient indicated as Milk proteins is lactoferrin.	Mixed supplements/formulations, STATE= Tablets, INGRED= Vitamin B9 (folic acid, folinic acid), INGRED= Vitamin C (ascorbic acid), INGRED= Iodine, INGRED= Milk protein, LEGIS= FA-17.1 Food supplements supplied in a solid form including capsules and tablets and similar forms, excluding chewable forms
P0075	A03SR#F04.A0EXD$F04.A0EXE		Fiber supplements, INGRED= Iron, INGRED= Zinc
P0076	A03SS#F03.A06JH$F04.A0ETZ$F33.A0C16	The ingredient indicated as Powdered extract of plant origin is blueberry dry extract .	Herbal formulations and plant extracts, STATE= Tablets, INGRED= Powdered extract of plant origin, LEGIS= FA-17.1 Food supplements supplied in a solid form including capsules and tablets and similar forms, excluding chewable forms
P0077	A03SL#F03.A06JH$F04.A0EXN$F04.A0ETY$F33.A0C16		Vitamin only supplements, STATE= Tablets, INGRED= Vitamin C (ascorbic acid), INGRED= Extracts of plant origin, LEGIS= FA-17.1 Food supplements supplied in a solid form including capsules and tablets and similar forms, excluding chewable forms
P0078	A03SX#F04.A0EVT$F04.A0EXL$F04.A037L		Formulations containing special fatty acids (e.g. Omega-3, essential fatty acids), INGRED= Omega-6 fatty acids, INGRED= Vitamin E (tocopherols, tocotrienols), INGRED= Other plant oils
P0079	A03TC#F04.A0EVG$F04.A0EVM$F04.A0EXE$F04.A037Q$F04.A038M$F04.A037L$F33.A0C16	The ingredient indicates as Phytochemicals is γ-orizanol. Amino acids are also contained.	Mixed supplements/formulations, INGRED= Vitamins, INGRED= Phytochemicals, INGRED= Zinc, INGRED= Wheat germ oil, INGRED= Fish oil, INGRED= Other plant oils, LEGIS= FA-17.1 Food supplements supplied in a solid form including capsules and tablets and similar forms, excluding chewable forms
P0080	A03SM#F04.A0EXD$F33.A0C16		Mineral only supplements, INGRED= Iron, LEGIS= FA-17.1 Food supplements supplied in a solid form including capsules and tablets and similar forms, excluding chewable forms
P0081	A03SB#F04.A0EXN$F04.A0EXL$F04.A0EXJ$F04.A0EXF	Sodium and chlorine are also contained.	Micronutrients supplement for sports people, INGRED= Vitamin C (ascorbic acid), INGRED= Vitamin E (tocopherols, tocotrienols), INGRED= Potassium, INGRED= Magnesium
P0082	A03SA#F03.A06JD$F04.A02PR$F04.A0EVG		Protein and protein components for sports people, STATE= Powder, INGRED= Milk protein, INGRED= Vitamins
P0083	A03TC#F03.A06JH$F04.A0EXM$F04.A0EVM$F33.A0C16	The ingredient indicated as Phytochemicals is alendronic acid.	Mixed supplements/formulations, STATE= Tablets, INGRED= Vitamin D (cholecalciferol), INGRED= Phytochemicals, LEGIS= FA-17.1 Food supplements supplied in a solid form including capsules and tablets and similar forms, excluding chewable forms
P0084	A03SR#F03.A06JD$F04.A0EXB$F04.A0EXE	Sodium is also contained.	Fiber supplements, STATE= Powder, INGRED= Copper , INGRED= Zinc
P0085	A03TC#F03.A06JH$F04.A0ETZ$F04.A0EVR$F04.A03CG$F04.A016T$F33.A0C16	The ingredients indicated as Powdered extract of plant origin are rhubarbroots dried extract and tamarind pulp dry extract. The ingredient indicated as dehydrated /powdered fruit juice is fig tree ' fruit concentrated juice powder; The ingredient indicated as Dietary fibre is acacia fibres ; The ingredient indicated as Dried herbs is rhubarb stalks powder .	Mixed supplements/formulations, STATE= Tablets, INGRED= Powdered extract of plant origin, INGRED= Dietary fibre, INGRED= Dehydrated/powdered fruit juice, INGRED= Dried herbs, LEGIS= FA-17.1 Food supplements supplied in a solid form including capsules and tablets and similar forms, excluding chewable forms
P0086	A03TC#F04.A0CVG$F04.A03CG$F04.A0ETZ		Mixed supplements/formulations, INGRED= Royal jelly, INGRED= Dehydrated/powdered fruit juice, INGRED= Powdered extract of plant origin
P0087	A03SM#F03.A06JL$F04.A0EXD$F33.A0C15		Mineral only supplements, STATE= Liquid, INGRED= Iron, LEGIS= FA-17.2 Food supplements supplied in a liquid form
P0088	A03TC#F04.A0EVM$F04.A0ETZ$F33.A0C16	The ingredients indicated as Phytochemicals are diosmin, diosmetin, hesperidin. The ingredients indicated as Powdered extract of plant origin are birch leaves dry extracts and sweet clover flowering tops dry extracts.	Mixed supplements/formulations, INGRED= Phytochemicals, INGRED= Powdered extract of plant origin, LEGIS= FA-17.1 Food supplements supplied in a solid form including capsules and tablets and similar forms, excluding chewable forms
P0089	A03SN#F04.A0EXM$F04.A0EXH		Combination of vitamin and mineral only supplements, INGRED= Vitamin D (cholecalciferol), INGRED= Calcium
P0090	A03SN#F04.A0EXM$F04.A0EXH		Combination of vitamin and mineral only supplements, INGRED= Vitamin D (cholecalciferol), INGRED= Calcium
P0091	A03SN#F04.A0F4M$F33.A0C16	The Ingredient indicated as Co-factors to metabolism is coenzyme Q10.	Combination of vitamin and mineral only supplements, INGRED= Co-factors to metabolism, LEGIS= FA-17.1 Food supplements supplied in a solid form including capsules and tablets and similar forms, excluding chewable forms
P0092	A03SC#F04.A0F4P$F04.A0EVG$F04.A0EVF	Amino acids are also contained. The ingredient indicated as Creatine-creatinine is creatine monohydrate.	Carnitine or creatine-based supplement for sports people, INGRED= Creatine-creatinine, INGRED= Vitamins, INGRED= Chemical elements
P0093	A03SV#F04.A0F4M$F33.A0C16	The ingredient indicated as Co-factors of metabolism is α-lipoic acid.	Other common supplements, INGRED= Co-factors to metabolism, LEGIS= FA-17.1 Food supplements supplied in a solid form including capsules and tablets and similar forms, excluding chewable forms
P0094	A03SV#F04.A0EVM$F04.A0EVG$F04.A0EVF$F33.A0C14	The ingredient indicated as Phytochemicals is β-glucans.	Other common supplements, INGRED= Phytochemicals, INGRED= Vitamins, INGRED= Chemical elements, LEGIS= FA-17.3 Food supplements supplied in a syrup-type or chewable form
P0095	A03SM#F03.A06JL$F04.A0F3A$F33.A0C15		Mineral only supplements, STATE= Liquid, INGRED= Fluorine, LEGIS= FA-17.2 Food supplements supplied in a liquid form
P0096	A03SN#F33.A0C16	Phosphorylserine is also contained.	Combination of vitamin and mineral only supplements, LEGIS= FA-17.1 Food supplements supplied in a solid form including capsules and tablets and similar forms, excluding chewable forms
P0097	A03SL#F33.A0C16		Vitamin only supplements, LEGIS= FA-17.1 Food supplements supplied in a solid form including capsules and tablets and similar forms, excluding chewable forms
P0098	A03SN#F03.A06JH$F23.A07TL$F33.A0C16	The target consumers indicated as Children food are children aged from 4 -14 years.	Combination of vitamin and mineral only supplements, STATE= Tablets, TARGCON= Children food, LEGIS= FA-17.1 Food supplements supplied in a solid form including capsules and tablets and similar forms, excluding chewable forms
P0099	A03SN#F04.A0EXD		Combination of vitamin and mineral only supplements, INGRED= Iron
P0100	A03SL#F03.A06JH$F04.A0EXQ$F33.A0C16		Vitamin only supplements, STATE= Tablets, INGRED= Vitamin B9 (folic acid, folinic acid), LEGIS= FA-17.1 Food supplements supplied in a solid form including capsules and tablets and similar forms, excluding chewable forms
P0101	A03SS#F04.A03CG$F04.A06KS		Herbal formulations and plant extracts, INGRED= Dehydrated/powdered fruit juice, INGRED= Berries flavour
P0102	A03SN#F04.A06MF$F23.A07TL$F33.A0C14	Glutamine is also contained. The target consumers indicated as Children food are children aged from 4 -12 years.	Combination of vitamin and mineral only supplements, INGRED= Chocolate flavour, TARGCON= Children food, LEGIS= FA-17.3 Food supplements supplied in a syrup-type or chewable form
P0103	A03TC#F04.A0F4N$F04.A0EVG$F04.A0EVF$F23.A07TL	The target consumers indicated as Children food are children aged from 7 -14 years. Phosphorylserine and glutamine are also contained.	Mixed supplements/formulations, INGRED= Carnitine, INGRED= Vitamins, INGRED= Chemical elements, TARGCON= Children food
P0104	A03SL#F04.A038Q$F04.A0EXZ$F04.A0EXM		Vitamin only supplements, INGRED= Cod liver oil, INGRED= Vitamin A (retinol, carotenoids), INGRED= Vitamin D (cholecalciferol)
P0105	A0F3Y#F04.A0BXY	The ingredients indicated as Microbiological or enzymatic ingredients are bacilli.	Probiotic or prebiotic formulations, INGRED= Microbiological or enzymatic ingredients
P0106	A03SN#F04.A02PR	The ingredient indicated as Milk proteins is lactoferrin.	Combination of vitamin and mineral only supplements, INGRED= Milk protein
P0107	A03SS#F03.A06JH$F04.A0EVQ$F33.A0C16	The ingredient indicated as Phytosterols are isoflavonoids from soy.	Herbal formulations and plant extracts, STATE= Tablets, INGRED= Phytosterols, LEGIS= FA-17.1 Food supplements supplied in a solid form including capsules and tablets and similar forms, excluding chewable forms
P0108	A03SS#F03.A06JH$F04.A0EVQ$F33.A0C16	The ingredient indicated as Phytosterols are isoflavonoids from soy.	Herbal formulations and plant extracts, STATE= Tablets, INGRED= Phytosterols, LEGIS= FA-17.1 Food supplements supplied in a solid form including capsules and tablets and similar forms, excluding chewable forms
P0109	A03SX#F04.A0EVV$F04.A038M		Formulations containing special fatty acids (e.g. Omega-3, essential fatty acids), INGRED= Omega-3 fatty acids, INGRED= Fish oil
P0110	A03SX#F04.A0EVT$F04.A037G		Formulations containing special fatty acids (e.g. Omega-3, essential fatty acids), INGRED= Omega-6 fatty acids, INGRED= Linseed oil
P0111	A03SM#F04.A0EXF$F04.A0EXJ$F04.A06RR	Aspartic acid is also contained.	Mineral only supplements, INGRED= Magnesium, INGRED= Potassium, INGRED= Orange flavour
P0112	A03SN#F04.A032V$F04.A0EVM	The Ingredient indicated as Phytochemical is citric acid.	Combination of vitamin and mineral only supplements, INGRED= Glucose, INGRED= Phytochemicals
P0113	A03SB#F04.A0EVF$F04.A0EXN$F04.A0EXL$F04.A0EXE$F04.A0F4N	Taurine and glutamine are also contained.	Micronutrients supplement for sports people, INGRED= Chemical elements, INGRED= Vitamin C (ascorbic acid), INGRED= Vitamin E (tocopherols, tocotrienols), INGRED= Zinc, INGRED= Carnitine
P0114	A03SB#F04.A0EVF$F04.A0EXN$F04.A0EXL$F04.A0EXE$F04.A032V$F04.A042P$F04.A0F4N$F04.A06RR	Taurine and glutamine are also contained.	Micronutrients supplement for sports people, INGRED= Chemical elements, INGRED= Vitamin C (ascorbic acid), INGRED= Vitamin E (tocopherols, tocotrienols), INGRED= Zinc, INGRED= Glucose, INGRED= Salt, INGRED= Carnitine, INGRED= Orange flavour
P0115	A03SN#F04.A0EXF$F04.A0EXJ$F04.A0EXN		Combination of vitamin and mineral only supplements, INGRED= Magnesium, INGRED= Potassium, INGRED= Vitamin C (ascorbic acid)
P0116	A03SN#F04.A0EXD$F04.A0EXE$F04.A0EXA$F04.A0EXT$F04.A0EVK	Phosphorylserine is also contained.	Combination of vitamin and mineral only supplements, INGRED= Iron, INGRED= Zinc, INGRED= Iodine, INGRED= Vitamin B5 (pantothenic acid), INGRED= Caffeine
P0117	A03TC#F04.A0EVG$F04.A0CVG	Carnosine is also contained.	Mixed supplements/formulations, INGRED= Vitamins, INGRED= Royal jelly
P0118	A03SL#F03.A06JL$F04.A0EXM		Vitamin only supplements, STATE= Liquid, INGRED= Vitamin D (cholecalciferol)
P0119	A03SN#F03.A06JL$F04.A0F3A		Combination of vitamin and mineral only supplements, STATE= Liquid, INGRED= Fluorine
P0120	A03SL#F03.A06JL		Vitamin only supplements, STATE= Liquid
P0121	A03SL#F03.A06JH$F04.A0EXM$F33.A0C16		Vitamin only supplements, STATE= Tablets, INGRED= Vitamin D (cholecalciferol), LEGIS= FA-17.1 Food supplements supplied in a solid form including capsules and tablets and similar forms, excluding chewable forms
P0122	A03TC#F04.A0EVF$F04.A0EVM$F04.A0F4M$F33.A0C16	Red yeast rice is also contained. The Ingredients indicated as Phytochemicals include gamma orizanol, policosanols, monacolin k. The ingredient indicated as co-factors to metabolism is coenzyme Q10. The ingredient indicated as chemical elements is chrome.	Mixed supplements/formulations, INGRED= Chemical elements, INGRED= Phytochemicals, INGRED= Co-factors to metabolism, LEGIS= FA-17.1 Food supplements supplied in a solid form including capsules and tablets and similar forms, excluding chewable forms
P0123	A03SX#F04.A038M$F04.A0EVV$F04.A0EXL		Formulations containing special fatty acids (e.g. Omega-3, essential fatty acids), INGRED= Fish oil, INGRED= Omega-3 fatty acids, INGRED= Vitamin E (tocopherols, tocotrienols)
P0124	A03SS#F04.A016T$F04.A037L$F33.A0C16	The Ingredients indicated as dried herbs include ginko leaves powder and siberian ginseng radix powder. The ingredient indicated as other plant oil is spanish sage essential oil.	Herbal formulations and plant extracts, INGRED= Dried herbs, INGRED= Other plant oils, LEGIS= FA-17.1 Food supplements supplied in a solid form including capsules and tablets and similar forms, excluding chewable forms
P0125	A03SM#F04.A0EXF$F04.A0EXJ		Mineral only supplements, INGRED= Magnesium, INGRED= Potassium
P0126	A03SM#F04.A0EXJ		Mineral only supplements, INGRED= Potassium
P0127	A03SV#F04.A0F4M$F04.A0EVG$F33.A0C16	The ingredient indicated as co-factors to metabolism is α-lipoic acid.	Other common supplements, INGRED= Co-factors to metabolism, INGRED= Vitamins, LEGIS= FA-17.1 Food supplements supplied in a solid form including capsules and tablets and similar forms, excluding chewable forms
P0128	A03SN#F23.A07TL		Combination of vitamin and mineral only supplements, TARGCON= Children food
P0129	A03SN		Combination of vitamin and mineral only supplements
P0130	A03SN		Combination of vitamin and mineral only supplements
P0131	A03SX#F04.A0EVV$F33.A0C16		Formulations containing special fatty acids (e.g. Omega-3, essential fatty acids), INGRED= Omega-3 fatty acids, LEGIS= FA-17.1 Food supplements supplied in a solid form including capsules and tablets and similar forms, excluding chewable forms
P0132	A03SN#F04.A0EXZ$F04.A0EXN$F04.A0EXL$F04.A0EVZ$F04.A0EXE		Combination of vitamin and mineral only supplements, INGRED= Vitamin A (retinol, carotenoids), INGRED= Vitamin C (ascorbic acid), INGRED= Vitamin E (tocopherols, tocotrienols), INGRED= Selenium, INGRED= Zinc
P0133	A03SQ#F04.A0CVG		Bee-produced formulations, INGRED= Royal jelly
P0134	A03SQ#F04.A0CVG		Bee-produced formulations, INGRED= Royal jelly
P0135	A03SN#F04.A0EXF$F04.A0EXJ$F04.A0EXN		Combination of vitamin and mineral only supplements, INGRED= Magnesium, INGRED= Potassium, INGRED= Vitamin C (ascorbic acid)
P0136	A03SN#F04.A0EZE$F23.A07TL	The ingredients indicated as Inulin and other polyfructoses are fructo-oligosaccharides.	Combination of vitamin and mineral only supplements, INGRED= Inulin and other polyfructoses, TARGCON= Children food
P0137	A03SV#F04.A02PR$F04.A0EZE	The ingredient indicates as Milk protein is lactoferrin. The ingredients indicated as Inulin and other polyfructoses are fructo-oligosaccharides.	Other common supplements, INGRED= Milk protein, INGRED= Inulin and other polyfructoses
P0138	A03SM#F03.A06JH$F04.A0EXJ$F33.A0C16		Mineral only supplements, STATE= Tablets, INGRED= Potassium, LEGIS= FA-17.1 Food supplements supplied in a solid form including capsules and tablets and similar forms, excluding chewable forms
P0139	A03TC#F04.A0ETZ$F04.A0EXF$F04.A0EXJ		Mixed supplements/formulations, INGRED= Powdered extract of plant origin, INGRED= Magnesium, INGRED= Potassium
P0140	A03TB#F03.A06JH$F33.A0C16		Yeast based formulations, STATE= Tablets, LEGIS= FA-17.1 Food supplements supplied in a solid form including capsules and tablets and similar forms, excluding chewable forms
P0141	A03TC#F04.A0EXN$F04.A0EXL$F04.A0EVT$F04.A0ETY$F33.A0C16		Mixed supplements/formulations, INGRED= Vitamin C (ascorbic acid), INGRED= Vitamin E (tocopherols, tocotrienols), INGRED= Omega-6 fatty acids, INGRED= Extracts of plant origin, LEGIS= FA-17.1 Food supplements supplied in a solid form including capsules and tablets and similar forms, excluding chewable forms
P0142	A03SS#F04.A0ETZ$F04.A03CG$F04.A0EVK		Herbal formulations and plant extracts, INGRED= Powdered extract of plant origin, INGRED= Dehydrated/powdered fruit juice, INGRED= Caffeine
P0143	A03SS#F04.A0ETZ$F04.A037L$F33.A0C16	The Ingredients indicated as Powdered extract of plant origin include ginko leaves concentrated extract, rhodiola root dry extract, grape seed dry extract. The ingredient indicated as Other plant oil is spanish sage essential oil.	Herbal formulations and plant extracts, INGRED= Powdered extract of plant origin, INGRED= Other plant oils, LEGIS= FA-17.1 Food supplements supplied in a solid form including capsules and tablets and similar forms, excluding chewable forms
P0144	A03SS#F04.A016T$F04.A03DA$F33.A0C16	The Ingredient indicated as Dried herbs include aloe vera powder. The ingredient indicated as dehydrated/powdered vegetable juice is aloe vera concentrated leaves juice in powder.	Herbal formulations and plant extracts, INGRED= Dried herbs, INGRED= Dehydrated/powdered vegetable juice, LEGIS= FA-17.1 Food supplements supplied in a solid form including capsules and tablets and similar forms, excluding chewable forms
P0145	A03SS#F04.A016T$F04.A0ETZ$F33.A0C16	The Ingredient indicated as Dried herbs include astragalus whole root powder. The ingredient indicated as Powdered extract of plant origin is Astragalus dry extract.	Herbal formulations and plant extracts, INGRED= Dried herbs, INGRED= Powdered extract of plant origin, LEGIS= FA-17.1 Food supplements supplied in a solid form including capsules and tablets and similar forms, excluding chewable forms
P0146	A03SS#F04.A0ETZ$F33.A0C16	The ingredient indicated as Powdered extract of plant origin is pycnogenol extract.	Herbal formulations and plant extracts, INGRED= Powdered extract of plant origin, LEGIS= FA-17.1 Food supplements supplied in a solid form including capsules and tablets and similar forms, excluding chewable forms
P0147	A03SS#F04.A0EVA$F04.A037D$F33.A0C16		Herbal formulations and plant extracts, INGRED= Liquid extract of plant origin, INGRED= Sunflower seed oil, edible, LEGIS= FA-17.1 Food supplements supplied in a solid form including capsules and tablets and similar forms, excluding chewable forms
P0148	A03ST#F04.A00VP$F33.A0C16		Algae based formulations (e.g. Spirulina, chlorella), INGRED= Spirulina, LEGIS= FA-17.1 Food supplements supplied in a solid form including capsules and tablets and similar forms, excluding chewable forms
P0149	A03SL#F03.A06JH$F04.A0EXQ$F33.A0C16		Vitamin only supplements, STATE= Tablets, INGRED= Vitamin B9 (folic acid, folinic acid), LEGIS= FA-17.1 Food supplements supplied in a solid form including capsules and tablets and similar forms, excluding chewable forms
P0150	A03SX#F04.A0EXL$F04.A037G		Formulations containing special fatty acids (e.g. Omega-3, essential fatty acids), INGRED= Vitamin E (tocopherols, tocotrienols), INGRED= Linseed oil
P0151	A03TC#F03.A06JH$F04.A0BXY$F04.A0EZE$F04.A016T$F33.A0C16	The ingredient indicated as Dried herbs is silver thistle powder. The ingredient indicated as Inulin and other polyfructoses is inulin. The igredients indicated as Microbiological or enzymatic ingredients are bacillus coagulans and fermented maltodextrins.	Mixed supplements/formulations, STATE= Tablets, INGRED= Microbiological or enzymatic ingredients, INGRED= Inulin and other polyfructoses, INGRED= Dried herbs, LEGIS= FA-17.1 Food supplements supplied in a solid form including capsules and tablets and similar forms, excluding chewable forms
P0152	A0F3Y#F04.A0EXE$F04.A02PR$F23.A07TL	The ingredient indicated as Milk protein is lactoferrin. The Target consumer are children aged 3-12 years.	Probiotic or prebiotic formulations, INGRED= Zinc, INGRED= Milk protein, TARGCON= Children food
P0153	A0F3Y#F33.A0C16		Probiotic or prebiotic formulations, LEGIS= FA-17.1 Food supplements supplied in a solid form including capsules and tablets and similar forms, excluding chewable forms
P0154	A03TZ#F33.A0C16		Coenzyme Q10 formulations, LEGIS= FA-17.1 Food supplements supplied in a solid form including capsules and tablets and similar forms, excluding chewable forms
P0155	A03TZ#F33.A0C16		Coenzyme Q10 formulations, LEGIS= FA-17.1 Food supplements supplied in a solid form including capsules and tablets and similar forms, excluding chewable forms
P0156	A03TZ#F03.A06JH$F33.A0C16		Coenzyme Q10 formulations, STATE= Tablets, LEGIS= FA-17.1 Food supplements supplied in a solid form including capsules and tablets and similar forms, excluding chewable forms
P0157	A03SY#F03.A06JH$F33.A0C16		Protein and amino acids supplements, STATE= Tablets, LEGIS= FA-17.1 Food supplements supplied in a solid form including capsules and tablets and similar forms, excluding chewable forms
P0158	A03SX#F04.A037G$F04.A038M$F04.A037L	The ingredient indicated as Other plant oils indicated is borage oil.	Formulations containing special fatty acids (e.g. Omega-3, essential fatty acids), INGRED= Linseed oil, INGRED= Fish oil, INGRED= Other plant oils
P0159	A03SR#F04.A06RR		Fiber supplements, INGRED= Orange flavour
P0160	A03SR#F04.A06RR		Fiber supplements, INGRED= Orange flavour
P0161	A03TC#F03.A06JH$F04.A0ETZ$F04.A0EVP$F33.A0C16	The ingredient indicated as powdered extract of plant origin are blackcurrant dry extract, holy basil dry extract, plantain dry extract, sage dryextract. The ingredient indicated as Polyphenols are quercetin and rutin.	Mixed supplements/formulations, STATE= Tablets, INGRED= Powdered extract of plant origin, INGRED= Polyphenols, LEGIS= FA-17.1 Food supplements supplied in a solid form including capsules and tablets and similar forms, excluding chewable forms
P0162	A03ST#F04.A00VP$F33.A0C16		Algae based formulations (e.g. Spirulina, chlorella), INGRED= Spirulina, LEGIS= FA-17.1 Food supplements supplied in a solid form including capsules and tablets and similar forms, excluding chewable forms
P0163	A03SS#F04.A016T$F33.A0C16	The ingredient indicated as Dried herbs is valerian root powder.	Herbal formulations and plant extracts, INGRED= Dried herbs, LEGIS= FA-17.1 Food supplements supplied in a solid form including capsules and tablets and similar forms, excluding chewable forms
P0164	A03TC#F03.A06JH$F04.A0EVM$F04.A0F4M$F04.A016T$F33.A0C16	Red yeast rice is also contained. The ingredients indicated as Phytochemicals include octacosanol, monacolin k. The ingredient indicated as Co-factors to metabolism is coenzyme Q10. The ingredient indicated as Dried herbs is barberry.	Mixed supplements/formulations, STATE= Tablets, INGRED= Phytochemicals, INGRED= Co-factors to metabolism, INGRED= Dried herbs, LEGIS= FA-17.1 Food supplements supplied in a solid form including capsules and tablets and similar forms, excluding chewable forms
P0165	A03SS#F04.A0ETZ$F33.A0C16	The ingredients indicated as Powdered extract of plant origin are indian barberry and milk thistle dry extracts.	Herbal formulations and plant extracts, INGRED= Powdered extract of plant origin, LEGIS= FA-17.1 Food supplements supplied in a solid form including capsules and tablets and similar forms, excluding chewable forms
P0166	A03SS#F03.A06JH$F04.A0ETZ$F33.A0C16	The ingredient indicated as Powdered extract of plant origin is pineapple jambs dry extract.	Herbal formulations and plant extracts, STATE= Tablets, INGRED= Powdered extract of plant origin, LEGIS= FA-17.1 Food supplements supplied in a solid form including capsules and tablets and similar forms, excluding chewable forms
P0167	A03SS#F03.A06JH$F04.A0ETZ$F33.A0C16	The ingredient indicated as Powdered extract of plant origin is dandelion root dry extract.	Herbal formulations and plant extracts, STATE= Tablets, INGRED= Powdered extract of plant origin, LEGIS= FA-17.1 Food supplements supplied in a solid form including capsules and tablets and similar forms, excluding chewable forms
P0168	A03SS#F04.A0ETZ$F33.A0C16	The ingredient indicated as Powdered extract of plant origin is hawthorn leaves and flowers dry extract	Herbal formulations and plant extracts, INGRED= Powdered extract of plant origin, LEGIS= FA-17.1 Food supplements supplied in a solid form including capsules and tablets and similar forms, excluding chewable forms
P0169	A03SS#F03.A06JC$F04.A0ETZ	The state indicated as Fragments/Granules/Splinters is granules.	Herbal formulations and plant extracts, STATE= Fragments / granules / splinters, INGRED= Powdered extract of plant origin
P0170	A03SN#F23.A07TL	The target consumers are children aged 4-12 years.	Combination of vitamin and mineral only supplements, TARGCON= Children food
P0171	A03SN#F23.A07TL	The target consumers are children aged 4-12 years.	Combination of vitamin and mineral only supplements, TARGCON= Children food
P0172	A03SL#F03.A06JL$F04.A0EXM$F23.A07TF	The target consumers are infants aged 0-1 years.	Vitamin only supplements, STATE= Liquid, INGRED= Vitamin D (cholecalciferol), TARGCON= Infant or toddler food
P0173	A03SN#F23.A07TL$F33.A0C14	The target consumers are infants aged 8-12 years.	Combination of vitamin and mineral only supplements, TARGCON= Children food, LEGIS= FA-17.3 Food supplements supplied in a syrup-type or chewable form
P0174	A03SL#F04.A0EXN$F04.A06RR$F04.A0EVM	The ingredient indicated as Phytochemicals are organic acids.	Vitamin only supplements, INGRED= Vitamin C (ascorbic acid), INGRED= Orange flavour, INGRED= Phytochemicals
P0175	A03SC#F03.A06JH$F04.A0F4N$F33.A0C16		Carnitine or creatine-based supplement for sports people, STATE= Tablets, INGRED= Carnitine, LEGIS= FA-17.1 Food supplements supplied in a solid form including capsules and tablets and similar forms, excluding chewable forms
P0176	A03SC#F03.A06JD$F04.A0F4P	The ingredient indicated as Creatine-creatinine is creatine.	Carnitine or creatine-based supplement for sports people, STATE= Powder, INGRED= Creatine-creatinine
P0177	A03SN#F03.A06JH$F04.A0EVM$F33.A0C16	The ingredient indicated as Phytochemical is betaine.	Combination of vitamin and mineral only supplements, STATE= Tablets, INGRED= Phytochemicals, LEGIS= FA-17.1 Food supplements supplied in a solid form including capsules and tablets and similar forms, excluding chewable forms
P0178	A03SV#F03.A06JH$F04.A0F4M$F33.A0C16	The ingredient indicated as Co-factors to metabolism is lipoic acid.	Other common supplements, STATE= Tablets, INGRED= Co-factors to metabolism, LEGIS= FA-17.1 Food supplements supplied in a solid form including capsules and tablets and similar forms, excluding chewable forms
P0179	A03SS#F04.A0ETY		Herbal formulations and plant extracts, INGRED= Extracts of plant origin
P0180	A03SS#F04.A01MA$F33.A0C16		Herbal formulations and plant extracts, INGRED= Dried fruit, LEGIS= FA-17.1 Food supplements supplied in a solid form including capsules and tablets and similar forms, excluding chewable forms
P0181	A03SX#F04.A038M$F04.A0EXM$F04.A0EVN	The ingredient indicated as Carotenoids is astaxanthin.	Formulations containing special fatty acids (e.g. Omega-3, essential fatty acids), INGRED= Fish oil, INGRED= Vitamin D (cholecalciferol), INGRED= Carotenoids
P0182	A03SY#F33.A0C16		Protein and amino acids supplements, LEGIS= FA-17.1 Food supplements supplied in a solid form including capsules and tablets and similar forms, excluding chewable forms
P0183	A03SY#F33.A0C16		Protein and amino acids supplements, LEGIS= FA-17.1 Food supplements supplied in a solid form including capsules and tablets and similar forms, excluding chewable forms
P0184	A03SY#F33.A0C16		Protein and amino acids supplements, LEGIS= FA-17.1 Food supplements supplied in a solid form including capsules and tablets and similar forms, excluding chewable forms
P0185	A03SY#F33.A0C16		Protein and amino acids supplements, LEGIS= FA-17.1 Food supplements supplied in a solid form including capsules and tablets and similar forms, excluding chewable forms
P0186	A03SY#F33.A0C16		Protein and amino acids supplements, LEGIS= FA-17.1 Food supplements supplied in a solid form including capsules and tablets and similar forms, excluding chewable forms
P0187	A03SY#F33.A0C16		Protein and amino acids supplements, LEGIS= FA-17.1 Food supplements supplied in a solid form including capsules and tablets and similar forms, excluding chewable forms
P0188	A03ST#F33.A0C16		Algae based formulations (e.g. Spirulina, chlorella), LEGIS= FA-17.1 Food supplements supplied in a solid form including capsules and tablets and similar forms, excluding chewable forms
P0189	A03SZ#F33.A0C16		Coenzyme q10 formulations, LEGIS= FA-17.1 Food supplements supplied in a solid form including capsules and tablets and similar forms, excluding chewable forms
P0190	A03TA#F04.A0ETZ		Enzyme-based formulations, INGRED= Powdered extract of plant origin
P0191	A03TC#F04.A0ETZ$F04.A0EVZ$F04.A0EXC$F04.A0F4M$F04.A042P$F33.A0C16	The ingredient indicated as Co-factors to metabolism is coenzyme Q10. N-acetyl cysteine is also contained.	Mixed supplements/formulations, INGRED= Powdered extract of plant origin, INGRED= Selenium, INGRED= Manganese, INGRED= Co-factors to metabolism, INGRED= Salt, LEGIS= FA-17.1 Food supplements supplied in a solid form including capsules and tablets and similar forms, excluding chewable forms
P0192	A03TC#F04.A0ETZ$F04.A0EVF$F04.A0EVN$F04.A042P	The ingredients indicated as powdered extract of plant origin are nettle dry extract, carrot dry extract, lemon balm dry extract , linden dry extract, fennel dry extract, dandelion dry extract.	Mixed supplements/formulations, INGRED= Powdered extract of plant origin, INGRED= Chemical elements, INGRED= Carotenoids, INGRED= Salt
P0193	A03SS#F04.A0ETZ$F04.A06RR	The ingredients indicated as powdered extract of plant origin are pumpkin dry extract, myrrh dry extract, turmeric dry extract.	Herbal formulations and plant extracts, INGRED= Powdered extract of plant origin, INGRED= Orange flavour
P0194	A03TC#F03.A06JH$F04.A031K$F04.A0EXE$F33.A0C16		Mixed supplements/formulations, STATE= Tablets, INGRED= Quail eggs, INGRED= Zinc, LEGIS= FA-17.1 Food supplements supplied in a solid form including capsules and tablets and similar forms, excluding chewable forms
P0195	A03SA#F04.A0ETY$F04.A0EVG$F04.A0EVF		Protein and protein components for sports people, INGRED= Extracts of plant origin, INGRED= Vitamins, INGRED= Chemical elements
P0196	A03SX#F04.A0EVV$F04.A038M$F04.A0F4M	The ingredient indicated as Co-factors to metabolism is coenzyme Q10.	Formulations containing special fatty acids (e.g. Omega-3, essential fatty acids), INGRED= Omega-3 fatty acids, INGRED= Fish oil, INGRED= Co-factors to metabolism
P0197	A03SN#F04.A06KL$F23.A07TL$F33.A0C14	The target consumers are children aged over 4 years.	Combination of vitamin and mineral only supplements, INGRED= Banana flavour, TARGCON= Children food, LEGIS= FA-17.3 Food supplements supplied in a syrup-type or chewable form
P0198	A03TC#F04.A0EVG$F04.A0EXE$F04.A0ETZ$F04.A06ML		Mixed supplements/formulations, INGRED= Vitamins, INGRED= Zinc, INGRED= Powdered extract of plant origin, INGRED= Citrus flavour
P0199	A03SL#F04.A06RZ	Glutamine and phosphrylserine are also contained.	Vitamin only supplements, INGRED= Passion fruit flavour
P0200	A03SN#F04.A0EXF$F04.A0EXJ$F04.A06ML		Combination of vitamin and mineral only supplements, INGRED= Magnesium, INGRED= Potassium, INGRED= Citrus flavour
P0201	A03SN#F04.A0EVQ		Combination of vitamin and mineral only supplements, INGRED= Phytosterols
P0202	A03SN#F03.A06JH$F33.A0C16		Combination of vitamin and mineral only supplements, STATE= Tablets, LEGIS= FA-17.1 Food supplements supplied in a solid form including capsules and tablets and similar forms, excluding chewable forms
P0203	A03SN#F04.A0EXM$F04.A0EXH$F04.A0EXF$F33.A0C16	Coral is also contained.	Combination of vitamin and mineral only supplements, INGRED= Vitamin D (cholecalciferol), INGRED= Calcium, INGRED= Magnesium, LEGIS= FA-17.1 Food supplements supplied in a solid form including capsules and tablets and similar forms, excluding chewable forms
P0204	A03SM#F04.A0EXH$F33.A0C16		Mineral only supplements, INGRED= Calcium, LEGIS= FA-17.1 Food supplements supplied in a solid form including capsules and tablets and similar forms, excluding chewable forms
P0205	A0F3Y#F04.A0EVR$F04.A0BXY&F04.A06VS$F04.A042P	The Ingredients indicated as Microrganisms or enzymatic ingredients are probiotics.	Probiotic or prebiotic formulations, INGRED= Dietary fibre, INGRED= Microbiological or enzymatic ingredients, INGRED= Vanilla flavour, INGRED= Salt
P0206	A03SR		Fiber supplements
P0207	A03SY#F33.A0C16		Protein and amino acids supplements, LEGIS= FA-17.1 Food supplements supplied in a solid form including capsules and tablets and similar forms, excluding chewable forms
P0208	A03SL#F33.A0C16		Vitamin only supplements, LEGIS= FA-17.1 Food supplements supplied in a solid form including capsules and tablets and similar forms, excluding chewable forms
P0209	A03ST#F04.A00VP$F33.A0C16		Algae based formulations (e.g. Spirulina, chlorella), INGRED= Spirulina, LEGIS= FA-17.1 Food supplements supplied in a solid form including capsules and tablets and similar forms, excluding chewable forms
P0210	A03SS#F03.A06JH$F04.A0ETY$F04.A03BN$F33.A0C16	The Ingredients indicated as Extracts of plant origin are milk thistle extract, dandelion root extract, turmeric extract; the ingredients indicated as Fruit juice concentrates are concentrate of bioflavonoids from Citrus fruit and acerola concentrate; complex of silybin and phosphatidylcholine(from soy) is also contained.	Herbal formulations and plant extracts, STATE= Tablets, INGRED= Extracts of plant origin, INGRED= Fruit juice concentrates, LEGIS= FA-17.1 Food supplements supplied in a solid form including capsules and tablets and similar forms, excluding chewable forms
P0211	A03SS#F04.A037H$F04.A0ETY$F33.A0C16	The Ingredients indicated as Extracts of plant origin are sabal extract, nettle root extract, extract of bioflavonoids .	Herbal formulations and plant extracts, INGRED= Pumpkin seed oil, INGRED= Extracts of plant origin, LEGIS= FA-17.1 Food supplements supplied in a solid form including capsules and tablets and similar forms, excluding chewable forms
P0212	A03SS#F03.A06JH$F04.A00GZ$F33.A0C16		Herbal formulations and plant extracts, STATE= Tablets, INGRED= Garlic, LEGIS= FA-17.1 Food supplements supplied in a solid form including capsules and tablets and similar forms, excluding chewable forms
P0213	A03TC#F04.A03BN$F04.A0F4M$F04.A00VA$F33.A0C16	The ingredient indicated as Fruit juice concentrates is concentrate of citrus fruit. The ingredient indicated as co-factors of metabolism is coenzyme Q10. The ingredient indicated as algae and prokaryotes organisms are Spiruline concentrate.	Mixed supplements/formulations, INGRED= Fruit juice concentrates, INGRED= Co-factors to metabolism, INGRED= Algae and prokaryotes organisms, LEGIS= FA-17.1 Food supplements supplied in a solid form including capsules and tablets and similar forms, excluding chewable forms
P0214	A03SS#F03.A06JH$F04.A0ETY$F04.A03BN$F33.A0C16	The ingredient indicated as Extracts of plant origin are Siberian Ginseng Extract, Ginkgo Biloba Extract, Schisandra berry extract and peppermint extract. The ingredient indicated as Fruit juice Concentrates are Acerola concentrate and citrus fruit concentrate.	Herbal formulations and plant extracts, STATE= Tablets, INGRED= Extracts of plant origin, INGRED= Fruit juice concentrates, LEGIS= FA-17.1 Food supplements supplied in a solid form including capsules and tablets and similar forms, excluding chewable forms
P0215	A03TC#F04.A0EXL$F04.A037Q$F33.A0C16		Mixed supplements/formulations, INGRED= Vitamin E (tocopherols, tocotrienols), INGRED= Wheat germ oil, LEGIS= FA-17.1 Food supplements supplied in a solid form including capsules and tablets and similar forms, excluding chewable forms
P0216	A03TC#F04.A0ETY$F04.A03BN$F33.A0C16	The ingredient indicated as Extracts of plant origin is Bowellia Extract. The ingredient indicated as Fruit juice Concentrates are citrus fruit concentrate and Acerola concentrate. Glucosamine HCl (from crustaceans , molluscs) is also contained.	Mixed supplements/formulations, INGRED= Extracts of plant origin, INGRED= Fruit juice concentrates, LEGIS= FA-17.1 Food supplements supplied in a solid form including capsules and tablets and similar forms, excluding chewable forms
P0217	A03TC#F03.A06JH$F04.A0EXD$F04.A0EXQ$F04.A00ZQ$F33.A0C16	The ingredient indicated as Dried Vegetables is Spinach concentrated powder.	Mixed supplements/formulations, STATE= Tablets, INGRED= Iron, INGRED= Vitamin B9 (folic acid, folinic acid), INGRED= Dried vegetables, LEGIS= FA-17.1 Food supplements supplied in a solid form including capsules and tablets and similar forms, excluding chewable forms
P0218	A03SS#F04.A0ETZ$F33.A0C16		Herbal formulations and plant extracts, INGRED= Powdered extract of plant origin, LEGIS= FA-17.1 Food supplements supplied in a solid form including capsules and tablets and similar forms, excluding chewable forms
P0219	A03SN#F03.A06JH$F04.A0EXF$F04.A0EXV$F04.A0EXY$F33.A0C16		Combination of vitamin and mineral only supplements, STATE= Tablets, INGRED= Magnesium, INGRED= Vitamin B3 (niacin, niacinamide), INGRED= Vitamin B1 (thiamine), LEGIS= FA-17.1 Food supplements supplied in a solid form including capsules and tablets and similar forms, excluding chewable forms
P0220	A03TC#F04.A0EXL$F04.A0F4M	The ingredient indicated as Co-factors to metabolism is Reduced Glutathione.	Mixed supplements/formulations, INGRED= Vitamin E (tocopherols, tocotrienols), INGRED= Co-factors to metabolism
P0221	A03SQ#F04.A0CVG		Bee-produced formulations, INGRED= Royal jelly
P0222	A03SS#F04.A0ETY$F04.A037Q$F04.A0BXY$F33.A0C16	The ingredients indicated as extract of plant origin are Millet seed oil extract and horsetail dry extract.The ingredient indicated as Microbiological or enzymatic ingredients is Brewer's yeast.	Herbal formulations and plant extracts, INGRED= Extracts of plant origin, INGRED= Wheat germ oil, INGRED= Microbiological or enzymatic ingredients, LEGIS= FA-17.1 Food supplements supplied in a solid form including capsules and tablets and similar forms, excluding chewable forms
P0223	A03SS#F04.A0ETY	The ingredient indicated as Extract of plant origin is Milk Thistle extract	Herbal formulations and plant extracts, INGRED= Extracts of plant origin
P0224	A03TC#F04.A0F4P$F04.A06RR	The ingredient indicated as creatine-creatinine is creatine monohydrate. Glutamine and leucine are also contained.	Mixed supplements/formulations, INGRED= Creatine-creatinine, INGRED= Orange flavour
P0225	A03SC#F04.A0F4N$F33.A0C16		Carnitine or creatine-based supplement for sports people, INGRED= Carnitine, LEGIS= FA-17.1 Food supplements supplied in a solid form including capsules and tablets and similar forms, excluding chewable forms
P0226	A03SS#F04.A0ETZ$F04.A01MA$F33.A0C16	The ingredient indicated as powdered extract of plant origin is blueberry dry extract. The ingredient indicated as dried fruit is Blueberry powder.	Herbal formulations and plant extracts, INGRED= Powdered extract of plant origin, INGRED= Dried fruit, LEGIS= FA-17.1 Food supplements supplied in a solid form including capsules and tablets and similar forms, excluding chewable forms
P0227	A03SM#F04.A0EXF$F33.A0C16		Mineral only supplements, INGRED= Magnesium, LEGIS= FA-17.1 Food supplements supplied in a solid form including capsules and tablets and similar forms, excluding chewable forms
P0228	A03SM#F04.A0EXF		Mineral only supplements, INGRED= Magnesium
P0229	A03TC#F04.A0EVG$F04.A0EVF	Amino acids are also contained.	Mixed supplements/formulations, INGRED= Vitamins, INGRED= Chemical elements
P0230	A03TC#F04.A0EXY$F04.A0EXX$F04.A0EXV$F04.A0EXS$F04.A0EXP$F04.A0F4M$F04.A0EVN$F33.A0C16	The ingredient indicated as co-factors to metabolism is lipoic acid; the ingredient indicated as carotenoids are lutein and astaxanthin.	Mixed supplements/formulations, INGRED= Vitamin B1 (thiamine), INGRED= Vitamin B2 (riboflavin), INGRED= Vitamin B3 (niacin, niacinamide), INGRED= Vitamin B6 (pyridoxine, pyridoxamine, pyridoxal), INGRED= Vitamin B12 (cyanocobalamin, hydroxocobalamin, methylcobalamin), INGRED= Co-factors to metabolism, INGRED= Carotenoids, LEGIS= FA-17.1 Food supplements supplied in a solid form including capsules…
P0231	A03SN#F03.A06JH$F04.A0EXF$F04.A0EVZ$F04.A0EXY$F04.A0EXX$F04.A0EXV$F04.A0EXT$F04.A0EXS$F04.A0EXR$F33.A0C16		Combination of vitamin and mineral only supplements, STATE= Tablets, INGRED= Magnesium, INGRED= Selenium, INGRED= Vitamin B1 (thiamine), INGRED= Vitamin B2 (riboflavin), INGRED= Vitamin B3 (niacin, niacinamide), INGRED= Vitamin B5 (pantothenic acid), INGRED= Vitamin B6 (pyridoxine, pyridoxamine, pyridoxal), INGRED= Vitamin B7 (biotin), LEGIS= FA-17.1 Food supplements supplied in a solid form incl…
P0232	A03SX#F04.A038M$F04.A0EVV		Formulations containing special fatty acids (e.g. Omega-3, essential fatty acids), INGRED= Fish oil, INGRED= Omega-3 fatty acids
P0233	A03SX#F04.A038M$F04.A0EVV		Formulations containing special fatty acids (e.g. Omega-3, essential fatty acids), INGRED= Fish oil, INGRED= Omega-3 fatty acids
P0234	A03SS#F04.A0ETZ$F33.A0C16	The ingredient indicated as powdered extract of plant origin is seine dry extract.	Herbal formulations and plant extracts, INGRED= Powdered extract of plant origin, LEGIS= FA-17.1 Food supplements supplied in a solid form including capsules and tablets and similar forms, excluding chewable forms
P0235	A03SS#F03.A06JH$F04.A0ETZ$F04.A016T$F33.A0C16	The ingredient indicated as powdered extract of plant origin is Valerian root dry extract and the ingredient indicated as dried herbs is hawthorn flowers and leaves powder.	Herbal formulations and plant extracts, STATE= Tablets, INGRED= Powdered extract of plant origin, INGRED= Dried herbs, LEGIS= FA-17.1 Food supplements supplied in a solid form including capsules and tablets and similar forms, excluding chewable forms
P0236	A03SV#F04.A0EVM$F33.A0C16	The ingredient indicated as phytochemicals is melatonin.	Other common supplements, INGRED= Phytochemicals, LEGIS= FA-17.1 Food supplements supplied in a solid form including capsules and tablets and similar forms, excluding chewable forms
P0237	A03SM#F04.A0EXJ$F04.A0EXF		Mineral only supplements, INGRED= Potassium, INGRED= Magnesium
P0238	A03SS#F03.A06JH$F04.A0ETZ$F04.A016T$F33.A0C16	The ingredient indicated as powdered extract of plant origin is artichoke leaves dry extract and the ingredient indicated as dried herbs is dandelion root powder.	Herbal formulations and plant extracts, STATE= Tablets, INGRED= Powdered extract of plant origin, INGRED= Dried herbs, LEGIS= FA-17.1 Food supplements supplied in a solid form including capsules and tablets and similar forms, excluding chewable forms
P0239	A03SN#F04.A0F4M$F04.A0EVP$F33.A0C16	The ingredient indicated as co-factors to metabolism is Coemzyme Q10. The ingredient indicated as polyphenol is resveratrol.	Combination of vitamin and mineral only supplements, INGRED= Co-factors to metabolism, INGRED= Polyphenols, LEGIS= FA-17.1 Food supplements supplied in a solid form including capsules and tablets and similar forms, excluding chewable forms
P0240	A03SN#F04.A06RR$F04.A0EVN$F04.A0EZE$F04.A0EZE$F04.A0ETZ	The ingredients indicated as Inulin and other polyfructoses is fructo-oligosaccharides. The ingredients indicated as powdered extract of plant origin is blueberry dry extract.	Combination of vitamin and mineral only supplements, INGRED= Orange flavour, INGRED= Carotenoids, INGRED= Inulin and other polyfructoses, INGRED= Inulin and other polyfructoses, INGRED= Powdered extract of plant origin
P0241	A03SN#F23.A07TL$F04.A06X$F04.A0EVN$F04.A0EZE$F04.A0EZE$F04.A0ETZ	The ingredients indicated as Inulin and other polyfructoses is fructo-oligosaccharides. The target consumers indicated as children food are children aged from 4 year. The ingredients indicated as powdered extract of plant origin is blueberry dry extract.
P0242	A03TC#F03.A06JH$F04.A0EVM$F04.A0ETZ$F04.A0EXS$F33.A0C16	Glutamine and tryptophan are also contained. The ingredient indicated as Phytochemicals is melatonin. The ingredients indicated as Powdered extract of plant origin are: griffonia seed dry extract, magnolia bark dry extract, valerian root, california poppy flowering tops dry extract, perforate St John's-wort flowering tops.	Mixed supplements/formulations, STATE= Tablets, INGRED= Phytochemicals, INGRED= Powdered extract of plant origin, INGRED= Vitamin B6 (pyridoxine, pyridoxamine, pyridoxal), LEGIS= FA-17.1 Food supplements supplied in a solid form including capsules and tablets and similar forms, excluding chewable forms
P0243	A03SS#F04.A0ETZ	The ingredients indicated as powdered extract of plant origin are: hawthorn leaves dry extract , blue skullcap herbs dry extract, linden buds dry extract, motherwort herbs and flowers dry extract .	Herbal formulations and plant extracts, INGRED= Powdered extract of plant origin
P0244	A03SS#F03.A06JH$F04.A0ETZ$F33.A0C16	The ingredients indicated as Powdered extract of plant origin are: senna fruit dry extract, caraway fruit dry extract, field eryngo root dry extract, peppermint leaves dry extract, licorice root dry extract, glossy buckthorn bark dry extract; mallow leaves dry extract.	Herbal formulations and plant extracts, STATE= Tablets, INGRED= Powdered extract of plant origin, LEGIS= FA-17.1 Food supplements supplied in a solid form including capsules and tablets and similar forms, excluding chewable forms
P0245	A03TC#F03.A06JH$F04.A0EXH$F04.A0EXF$F04.A0ETZ$F33.A0C16	The ingredient indicated as powdered extract of plant origin are lemon balm leaves dry extract, lentisk resin dry extract.	Mixed supplements/formulations, STATE= Tablets, INGRED= Calcium, INGRED= Magnesium, INGRED= Powdered extract of plant origin, LEGIS= FA-17.1 Food supplements supplied in a solid form including capsules and tablets and similar forms, excluding chewable forms
P0246	A03SS#F04.A0ETZ$F04.A036X$F04.A00GZ	The ingredient indicated as Powdered extract of plant origin are hawthorn flowers dry extracts, mistletoe leaves dry extract. The ingredient indicated garlic is oily garlic bulbs macerate -with refined soybean oil . Soya bean oil partially hydrogenated is also contained.	Herbal formulations and plant extracts, INGRED= Powdered extract of plant origin, INGRED= Soya bean oil, refined, INGRED= Garlic
P0247	A03SS#F04.A0ETZ$F33.A0C16	The ingredient indicated as Powdered extract of plant origin are black or chebulic myrobalan fruit dry extract , Indian gooseberry fruit dry extract, belleric or bastard myrobalan fruit dry extract.	Herbal formulations and plant extracts, INGRED= Powdered extract of plant origin, LEGIS= FA-17.1 Food supplements supplied in a solid form including capsules and tablets and similar forms, excluding chewable forms
P0248	A03SS#F03.A06JH$F04.A0ETZ$F04.A016T$F04.A0EVA$F33.A0C16	The ingredient indicated as Powdered extract of plant origin are woundwort flowering tops dry extract , mouse-ear hawkweed aereal part dry extract, Birch leaves dry extract, Spirea flowering tops dry extract; the ingredient indicated as dried herbs are Spirea flowering tops powder, Birch leaves powder, woundwort flowering tops powder, mouse-ear hawkweed aereal part powder; the ingredient indicate…	Herbal formulations and plant extracts, STATE= Tablets, INGRED= Powdered extract of plant origin, INGRED= Dried herbs, INGRED= Liquid extract of plant origin, LEGIS= FA-17.1 Food supplements supplied in a solid form including capsules and tablets and similar forms, excluding chewable forms
P0249	A03SS#F03.A06JH$F04.A0ETZ$F04.A016T$F04.A00ZQ$F04.A037L$F33.A0C16	The ingredient indicated as Powdered extract of plant origin are Artichoke leaves dry extract , Marian thistle fruits dry extract, Dandelion root dry extract ; the ingredients indicated as dried herbs are turmeric rhizome powder, Dandelion root powder; the ingredient indicated as dried vegetables is Artichoke leaves powder; the ingredient indicates as other plant oil is Rosemary essential oil	Herbal formulations and plant extracts, STATE= Tablets, INGRED= Powdered extract of plant origin, INGRED= Dried herbs, INGRED= Dried vegetables, INGRED= Other plant oils, LEGIS= FA-17.1 Food supplements supplied in a solid form including capsules and tablets and similar forms, excluding chewable forms
P0250	A03TC#F04.A06QE$F04.A0EXJ$F04.A0ETZ$F04.A037L	The ingredients indicated as Powdered extract of plant origin are cinchona bark dry extract and ginger rizhome dry extract; the ingredient indicates as other plant oil is lemon essential oil. Sodium is also contained.	Mixed supplements/formulations, INGRED= Lemon flavour, INGRED= Potassium, INGRED= Powdered extract of plant origin, INGRED= Other plant oils
P0251	A03TC#F04.A0ETZ$F04.A0BXY$F33.A0C16	The ingredients indicated as Powdered extract of plant origin are Lemon balm leaves dry extract and Fennel fruit dry extract ; the ingredients indicated as Microbiological or enzymatic ingredients are lactase and Fermented rice starch.	Mixed supplements/formulations, INGRED= Powdered extract of plant origin, INGRED= Microbiological or enzymatic ingredients, LEGIS= FA-17.1 Food supplements supplied in a solid form including capsules and tablets and similar forms, excluding chewable forms
P0252	A03SS#F04.A0ETZ$F04.A00ZQ$F33.A0C16	The ingredients indicated as Powdered extract of plant origin are fennel fruit dry extract, caraway Fruit dry extract, ginger rhizome dry extract. The ingredient indicated as Dried vegetables is charcoal.	Herbal formulations and plant extracts, INGRED= Powdered extract of plant origin, INGRED= Dried vegetables, LEGIS= FA-17.1 Food supplements supplied in a solid form including capsules and tablets and similar forms, excluding chewable forms
P0253	A03TC#F03.A06JH$F04.A0ETZ$F04.A0BXY$F33.A0C16	The ingredients indicated as Powdered extract of plant origin are fennel fruit dry extract, ginger rhizome dry extract, lemon balm flowering tops dry extract; the ingredients indicated as Microbiological or enzymatic ingredients are bromelain, fermented rice starch, alpha-galactosidase.	Mixed supplements/formulations, STATE= Tablets, INGRED= Powdered extract of plant origin, INGRED= Microbiological or enzymatic ingredients, LEGIS= FA-17.1 Food supplements supplied in a solid form including capsules and tablets and similar forms, excluding chewable forms
P0254	A03SS#F04.A0ETZ$F33.A0C16	The ingredient indicated as Powdered extract of plant origin is grapefruit seed	Herbal formulations and plant extracts, INGRED= Powdered extract of plant origin, LEGIS= FA-17.1 Food supplements supplied in a solid form including capsules and tablets and similar forms, excluding chewable forms
P0255	A03SM#F03.A06JH$F04.A0EXF$F04.A0EZE$F33.A0C16	The ingredients indicated as Inulin and other Polyfructoses are fructo-oligosaccharides.	Mineral only supplements, STATE= Tablets, INGRED= Magnesium, INGRED= Inulin and other polyfructoses, LEGIS= FA-17.1 Food supplements supplied in a solid form including capsules and tablets and similar forms, excluding chewable forms
P0256	A03SL#F03.A06JH$F04.A0EXM$F33.A0C16		Vitamin only supplements, STATE= Tablets, INGRED= Vitamin D (cholecalciferol), LEGIS= FA-17.1 Food supplements supplied in a solid form including capsules and tablets and similar forms, excluding chewable forms
P0257	A03SS#F04.A0ETZ$F33.A0C16	The ingredient indicated as Powdered extract of plant origin is griffonia seed dry extract.	Herbal formulations and plant extracts, INGRED= Powdered extract of plant origin, LEGIS= FA-17.1 Food supplements supplied in a solid form including capsules and tablets and similar forms, excluding chewable forms
P0258	A03SV#F03.A06JH$F04.A0EVM$F33.A0C16	The Ingredient indicated as phytochemicals is melatonin.	Other common supplements, STATE= Tablets, INGRED= Phytochemicals, LEGIS= FA-17.1 Food supplements supplied in a solid form including capsules and tablets and similar forms, excluding chewable forms
P0259	A03SS#F04.A0ETZ$F33.A0C16	The ingredients indicated as Powdered extract of plant origin are bitter melon fruit dry extract, gymnema leaves dry extract , andrographis leaves dry extract. Chrome is also contained.	Herbal formulations and plant extracts, INGRED= Powdered extract of plant origin, LEGIS= FA-17.1 Food supplements supplied in a solid form including capsules and tablets and similar forms, excluding chewable forms
P0260	A03SL#F03.A06JH$F04.A0EXQ$F33.A0C16		Vitamin only supplements, STATE= Tablets, INGRED= Vitamin B9 (folic acid, folinic acid), LEGIS= FA-17.1 Food supplements supplied in a solid form including capsules and tablets and similar forms, excluding chewable forms
P0261	A03SV#F03.A06JH$F04.A0F4M$F33.A0C16	The ingredient indicated as Co-factors of metabolism is α-lipoic acid.	Other common supplements, STATE= Tablets, INGRED= Co-factors to metabolism, LEGIS= FA-17.1 Food supplements supplied in a solid form including capsules and tablets and similar forms, excluding chewable forms
P0262	A03SM#F04.A0EXE$F33.A0C16		Mineral only supplements, INGRED= Zinc, LEGIS= FA-17.1 Food supplements supplied in a solid form including capsules and tablets and similar forms, excluding chewable forms
P0263	A03SS#F04.A0ETZ$F33.A0C16	The ingredient indicated as Powdered extract of plant origin is goji fruit dry extract.	Herbal formulations and plant extracts, INGRED= Powdered extract of plant origin, LEGIS= FA-17.1 Food supplements supplied in a solid form including capsules and tablets and similar forms, excluding chewable forms
P0264	A03SS#F04.A0ETZ$F33.A0C16	The ingredient indicated as Powdered extract of plant origin is maqui fruit dry extract.	Herbal formulations and plant extracts, INGRED= Powdered extract of plant origin, LEGIS= FA-17.1 Food supplements supplied in a solid form including capsules and tablets and similar forms, excluding chewable forms
P0265	A03SS#F04.A0ETZ$F33.A0C16	The ingredient indicated as Powdered fruit extract of plant origin is pomegranate fruit dry extract.	Herbal formulations and plant extracts, INGRED= Powdered extract of plant origin, LEGIS= FA-17.1 Food supplements supplied in a solid form including capsules and tablets and similar forms, excluding chewable forms
P0266	A03SS#F04.A0ETZ$F04.A0EVP$F33.A0C16	The ingredient indicated as Powdered extract of plant origin is rhodiola rosea dry extract; the ingredient indicated as Polyphenols is salinidroside. Rosavin (a phenylpropanoid) is also contained.	Herbal formulations and plant extracts, INGRED= Powdered extract of plant origin, INGRED= Polyphenols, LEGIS= FA-17.1 Food supplements supplied in a solid form including capsules and tablets and similar forms, excluding chewable forms
P0267	A03SS#F04.A016T$F04.A01AL$F33.A0C16		Herbal formulations and plant extracts, INGRED= Dried herbs, INGRED= Cloves buds, LEGIS= FA-17.1 Food supplements supplied in a solid form including capsules and tablets and similar forms, excluding chewable forms
P0268	A03SS#F04.A0ETZ$F04.A00GZ$F33.A0C16	The ingredient indicated as Powdered extract of plant is garlic.	Herbal formulations and plant extracts, INGRED= Powdered extract of plant origin, INGRED= Garlic, LEGIS= FA-17.1 Food supplements supplied in a solid form including capsules and tablets and similar forms, excluding chewable forms
P0269	A03SY#F33.A0C16	L-Glutamine is contained.	Protein and amino acids supplements, LEGIS= FA-17.1 Food supplements supplied in a solid form including capsules and tablets and similar forms, excluding chewable forms
P0270	A03SS#F03.A06JD$F04.A0D9Y		Herbal formulations and plant extracts, STATE= Powder, INGRED= Barley and similar-
P0271	A03SV#F03.A06JD		Other common supplements, STATE= Powder
P0272	A03SZ#F33.A0C16		Coenzyme q10 formulations, LEGIS= FA-17.1 Food supplements supplied in a solid form including capsules and tablets and similar forms, excluding chewable forms
P0273	A03SS#F04.A016T$F33.A0C16	The ingredient indicated as dried herbs is Wormwood (Artemisia absinthium)	Herbal formulations and plant extracts, INGRED= Dried herbs, LEGIS= FA-17.1 Food supplements supplied in a solid form including capsules and tablets and similar forms, excluding chewable forms
P0274	A0F3Y#F04.A0BXY	The ingredients indicated as Microbiological or enzymatic ingredients are Lactobacillus Acidophilus R52 and Bifidobacterium lactis	Probiotic or prebiotic formulations, INGRED= Microbiological or enzymatic ingredients
P0275	A03TC#F04.A0ETZ$F04.A0EXS$F04.A0EXQ$F04.A0EXP$F04.A0EXM$F04.A0EXL$F04.A0EXH$F33.A0C16	The ingredient indicated as Powdered extract of plant origin is soy extract	Mixed supplements/formulations, INGRED= Powdered extract of plant origin, INGRED= Vitamin B6 (pyridoxine, pyridoxamine, pyridoxal), INGRED= Vitamin B9 (folic acid, folinic acid), INGRED= Vitamin B12 (cyanocobalamin, hydroxocobalamin, methylcobalamin), INGRED= Vitamin D (cholecalciferol), INGRED= Vitamin E (tocopherols, tocotrienols), INGRED= Calcium, LEGIS= FA-17.1 Food supplements supplied in a …
P0276	A03SL#F03.A06JH$F04.A0EXM$F33.A0C16		Vitamin only supplements, STATE= Tablets, INGRED= Vitamin D (cholecalciferol), LEGIS= FA-17.1 Food supplements supplied in a solid form including capsules and tablets and similar forms, excluding chewable forms
P0277	A03SL#F04.A0EXN$F33.A0C14		Vitamin only supplements, INGRED= Vitamin C (ascorbic acid), LEGIS= FA-17.3 Food supplements supplied in a syrup-type or chewable form
P0278	A03SX#F04.A038M$F04.A0EVV		Formulations containing special fatty acids (e.g. Omega-3, essential fatty acids), INGRED= Fish oil, INGRED= Omega-3 fatty acids
P0279	A03TC#F03.A06JH$F04.A0EVM$F04.A0ETZ$F33.A0C16	The ingredient indicated ad phytochemicals is Meleatonin. The ingredients indicated as Powdered extract of plant origin are passion flower dry extract, valerian dry extract , melissa dry extract , escolzia dry weight.	Mixed supplements/formulations, STATE= Tablets, INGRED= Phytochemicals, INGRED= Powdered extract of plant origin, LEGIS= FA-17.1 Food supplements supplied in a solid form including capsules and tablets and similar forms, excluding chewable forms
P0280	A03SS#F03.A06JH$F04.A016T$F04.A00ZQ$F33.A0C16	The ingredients indicated as Dried herbs is cumin. The ingredient indicated as Dried vegetables is vegetable charcoal.	Herbal formulations and plant extracts, STATE= Tablets, INGRED= Dried herbs, INGRED= Dried vegetables, LEGIS= FA-17.1 Food supplements supplied in a solid form including capsules and tablets and similar forms, excluding chewable forms
P0281	A03SS#F04.A016T$F04.A0ETZ$F33.A0C16	The ingredients indicated as Dried herbs are green anise fruit powder, fennel fruit powder, caraway fruit powder. The ingredient indicated as Powdered extract of plant origin is rheum rhizome dry extract	Herbal formulations and plant extracts, INGRED= Dried herbs, INGRED= Powdered extract of plant origin, LEGIS= FA-17.1 Food supplements supplied in a solid form including capsules and tablets and similar forms, excluding chewable forms
P0282	A03TC#F03.A06JH$F04.A0EVQ$F33.A0C16	Red yeast rice is also contained.	Mixed supplements/formulations, STATE= Tablets, INGRED= Phytosterols, LEGIS= FA-17.1 Food supplements supplied in a solid form including capsules and tablets and similar forms, excluding chewable forms
P0283	A03SS#F04.A03DG$F04.A0BB6$F33.A0C15		Herbal formulations and plant extracts, INGRED= Aloe vera juice, INGRED= Aloe leaf gel (pulp), LEGIS= FA-17.2 Food supplements supplied in a liquid form
P0284	A03SS#F03.A06JL$F04.A0EVA$F33.A0C15	The ingredient indicated as Liquid extract of plant origin is hydroalcoholic extract of bearberry leaves	Herbal formulations and plant extracts, STATE= Liquid, INGRED= Liquid extract of plant origin, LEGIS= FA-17.2 Food supplements supplied in a liquid form
P0285	A03SS#F03.A06JL$F04.A0EVA$F33.A0C15	The ingredient indicated as Liquid extract of plant origin is hydroalcoholic extract of devil's claw root	Herbal formulations and plant extracts, STATE= Liquid, INGRED= Liquid extract of plant origin, LEGIS= FA-17.2 Food supplements supplied in a liquid form
P0286	A03SS#F03.A06JL$F04.A0EVA$F33.A0C15	The ingredient indicated as Liquid extract of plant origin is hydroalcoholic extract of sage leaves	Herbal formulations and plant extracts, STATE= Liquid, INGRED= Liquid extract of plant origin, LEGIS= FA-17.2 Food supplements supplied in a liquid form
P0287	A03SS#F03.A06JL$F04.A0EVA$F33.A0C15	The ingredient indicated as Liquid extract of plant origin is hydroalcoholic extract of garlic bulbs	Herbal formulations and plant extracts, STATE= Liquid, INGRED= Liquid extract of plant origin, LEGIS= FA-17.2 Food supplements supplied in a liquid form
P0288	A03SS#F03.A06JL$F04.A0EVA$F33.A0C15	The ingredient indicated as Liquid extract of plant origin is hydroalcoholic extract of chaste tree fruits.	Herbal formulations and plant extracts, STATE= Liquid, INGRED= Liquid extract of plant origin, LEGIS= FA-17.2 Food supplements supplied in a liquid form
P0289	A03SS#F03.A06JL$F04.A0EVA$F33.A0C15	The ingredient indicated as Liquid extract of plant origin is hydroalcoholic extract of burdock fruits.	Herbal formulations and plant extracts, STATE= Liquid, INGRED= Liquid extract of plant origin, LEGIS= FA-17.2 Food supplements supplied in a liquid form
P0290	A03SS#F03.A06JL$F04.A0EVA$F33.A0C15	The ingredient indicated as Liquid extract of plant origin is hydroalcoholic extract of birch leaves	Herbal formulations and plant extracts, STATE= Liquid, INGRED= Liquid extract of plant origin, LEGIS= FA-17.2 Food supplements supplied in a liquid form
P0291	A03SS#F03.A06JL$F04.A0EVA$F33.A0C15	The ingredient indicated as Liquid extract of plant origin is hydroalcoholic extract of marigold fruits	Herbal formulations and plant extracts, STATE= Liquid, INGRED= Liquid extract of plant origin, LEGIS= FA-17.2 Food supplements supplied in a liquid form
P0292	A03SS#F03.A06JL$F04.A0EVA$F33.A0C15	The ingredient indicated as Liquid extract of plant origin is hydroalcoholic extract of artichoke leaves	Herbal formulations and plant extracts, STATE= Liquid, INGRED= Liquid extract of plant origin, LEGIS= FA-17.2 Food supplements supplied in a liquid form
P0293	A03SS#F03.A06JL$F04.A0EVA$F33.A0C15	The ingredient indicated as Liquid extract of plant origin is hydroalcoholic extract of milk thistle seeds	Herbal formulations and plant extracts, STATE= Liquid, INGRED= Liquid extract of plant origin, LEGIS= FA-17.2 Food supplements supplied in a liquid form
P0294	A03SS#F03.A06JL$F04.A0EVA$F33.A0C15	The ingredient indicated as Liquid extract of plant origin is hydroalcoholic extract of centella aerial parts	Herbal formulations and plant extracts, STATE= Liquid, INGRED= Liquid extract of plant origin, LEGIS= FA-17.2 Food supplements supplied in a liquid form
P0295	A03SS#F03.A06JL$F04.A0EVA$F33.A0C15	The ingredient indicated as Liquid extract of plant origin is hydroalcoholic extract of turmeric rhizome.	Herbal formulations and plant extracts, STATE= Liquid, INGRED= Liquid extract of plant origin, LEGIS= FA-17.2 Food supplements supplied in a liquid form
P0296	A03SS#F03.A06JL$F04.A0EVA$F33.A0C15	The ingredient indicated as Liquid extract of plant origin is hydroalcoholic extract of echinacea root.	Herbal formulations and plant extracts, STATE= Liquid, INGRED= Liquid extract of plant origin, LEGIS= FA-17.2 Food supplements supplied in a liquid form
P0297	A03SS#F03.A06JL$F04.A0EVA$F33.A0C15	The ingredient indicated as Liquid extract of plant origin is hydroalcoholic extract of horsetail sterile stems.	Herbal formulations and plant extracts, STATE= Liquid, INGRED= Liquid extract of plant origin, LEGIS= FA-17.2 Food supplements supplied in a liquid form
P0298	A03SS#F03.A06JL$F04.A0EVA$F33.A0C15	The ingredient indicated as Liquid extract of plant origin is hydroalcoholic extract of erisimo aerial parts.	Herbal formulations and plant extracts, STATE= Liquid, INGRED= Liquid extract of plant origin, LEGIS= FA-17.2 Food supplements supplied in a liquid form
P0299	A03ST#F03.A06JL$F04.A00VK$F33.A0C15	The ingredient indicated as Brown algae is hydroalcoholic extract of fucus thallus.	Algae based formulations (e.g. Spirulina, chlorella), STATE= Liquid, INGRED= Brown algae, LEGIS= FA-17.2 Food supplements supplied in a liquid form
P0300	A03SS#F03.A06JL$F04.A0EVA$F33.A0C15	The ingredient indicated as Liquid extract of plant origin is hydroalcoholic extract of ginko leaves.	Herbal formulations and plant extracts, STATE= Liquid, INGRED= Liquid extract of plant origin, LEGIS= FA-17.2 Food supplements supplied in a liquid form
P0301	A03SS#F03.A06JL$F04.A0EVA$F33.A0C15	The ingredient indicated as Liquid extract of plant origin is hydroalcoholic extract of ginseng root.	Herbal formulations and plant extracts, STATE= Liquid, INGRED= Liquid extract of plant origin, LEGIS= FA-17.2 Food supplements supplied in a liquid form
P0302	A03SS#F03.A06JL$#F04.A0EVA$F33.A0C15	The ingredient indicated as Liquid extract of plant origin is hydroalcoholic extract of lemon balm leaves.	Herbal formulations and plant extracts, STATE= Liquid, INGRED= Liquid extract of plant origin, LEGIS= FA-17.2 Food supplements supplied in a liquid form
P0303	A03SS#F03.A06JL$F04.A0EVA$F33.A0C15	The ingredient indicated as Liquid extract of plant origin is hydroalcoholic extract of blueberry fruit.	Herbal formulations and plant extracts, STATE= Liquid, INGRED= Liquid extract of plant origin, LEGIS= FA-17.2 Food supplements supplied in a liquid form
P0304	A03SS#F03.A06JL$F04.A0EVA$F33.A0C15	The ingredient indicated as Liquid extract of plant origin is hydroalcoholic extract of olive tree leaves.	Herbal formulations and plant extracts, STATE= Liquid, INGRED= Liquid extract of plant origin, LEGIS= FA-17.2 Food supplements supplied in a liquid form
P0305	A03SS#F03.A06JL$F04.A0EVA$F33.A0C15	The ingredient indicated as Liquid extract of plant origin is hydroalcoholic extract of passion flower flowering tops.	Herbal formulations and plant extracts, STATE= Liquid, INGRED= Liquid extract of plant origin, LEGIS= FA-17.2 Food supplements supplied in a liquid form
P0306	A03SS#F03.A06JL$F04.A0EVA$F33.A0C15	The ingredient indicated as Liquid extract of plant origin is hydroalcoholic extract of hawkweed.	Herbal formulations and plant extracts, STATE= Liquid, INGRED= Liquid extract of plant origin, LEGIS= FA-17.2 Food supplements supplied in a liquid form
P0307	A03SS#F03.A06JL$F04.A0EVA$F33.A0C15	The ingredient indicated as Liquid extract of plant origin is hydroalcoholic extract of black currant leaves.	Herbal formulations and plant extracts, STATE= Liquid, INGRED= Liquid extract of plant origin, LEGIS= FA-17.2 Food supplements supplied in a liquid form
P0308	A03SS#F03.A06JL$F04.A0EVA$F33.A0C15	The ingredient indicated as Liquid extract of plant origin is hydroalcoholic extract of asplenium ceterach aerial parts.	Herbal formulations and plant extracts, STATE= Liquid, INGRED= Liquid extract of plant origin, LEGIS= FA-17.2 Food supplements supplied in a liquid form
P0309	A03SS#F03.A06JL$F04.A0EVA$F33.A0C15	The ingredient indicated as Liquid extract of plant origin is hydroalcoholic extract of dandelion roots.	Herbal formulations and plant extracts, STATE= Liquid, INGRED= Liquid extract of plant origin, LEGIS= FA-17.2 Food supplements supplied in a liquid form
P0310	A03SS#F03.A06JL$F04.A0EVA$F33.A0C15	The ingredient indicated as Liquid extract of plant origin is hydroalcoholic extract of cat's claw bark.	Herbal formulations and plant extracts, STATE= Liquid, INGRED= Liquid extract of plant origin, LEGIS= FA-17.2 Food supplements supplied in a liquid form
P0311	A03SS#F03.A06JL$F04.A0EVA$F33.A0C15	The ingredient indicated as Liquid extract of plant origin is hydroalcoholic extract of valerian root.	Herbal formulations and plant extracts, STATE= Liquid, INGRED= Liquid extract of plant origin, LEGIS= FA-17.2 Food supplements supplied in a liquid form
P0312	A03TC#F03.A06JH$F04.A0ETZ$F04.A0EVP$F04.A0EXN$F04.A0EXT$F04.A038M$F04.A0EVV$F33.A0C16	The ingredients indicated as licorice root dry extract, plantain leaves dry extract , chamomile flowers dry extracts, nettle aerial parts. The ingredient indicated as polyphenols is quercetin. Methylsulfonylmethane is also contained.	Mixed supplements/formulations, STATE= Tablets, INGRED= Powdered extract of plant origin, INGRED= Polyphenols, INGRED= Vitamin C (ascorbic acid), INGRED= Vitamin B5 (pantothenic acid), INGRED= Fish oil, INGRED= Omega-3 fatty acids, LEGIS= FA-17.1 Food supplements supplied in a solid form including capsules and tablets and similar forms, excluding chewable forms
P0313	A0F3Y#F03.A06JD$F04.A0EZE	The ingredient indicated as Inulin and other polyfructoses is Inulin.	Probiotic or prebiotic formulations, STATE= Powder, INGRED= Inulin and other polyfructoses
P0314	A03SS#F03.A06JH$F04.A016T$F04.A0ETY$F04.A00ZQ$F33.A0C16	The ingredients indicated as Dried herbs are fennel powder, star anise powder. The ingredient indicated as Extract of plant origin are fennel oil extract and star anise oil extract. The ingredient indicated as dried vegetables is vegetable charcoal.	Herbal formulations and plant extracts, STATE= Tablets, INGRED= Dried herbs, INGRED= Extracts of plant origin, INGRED= Dried vegetables, LEGIS= FA-17.1 Food supplements supplied in a solid form including capsules and tablets and similar forms, excluding chewable forms
P0315	A03TC#F04.A0ETY$F04.A0EXN$F33.A0C16	The ingredient indicated as Extracts of plant origin is devil's claw root extract.	Mixed supplements/formulations, INGRED= Extracts of plant origin, INGRED= Vitamin C (ascorbic acid), LEGIS= FA-17.1 Food supplements supplied in a solid form including capsules and tablets and similar forms, excluding chewable forms
P0316	A03TC#F04.A0ETY$F04.A0EXF$F33.A0C16	The ingredient indicated as Extracts of plant origin is roseroot root.	Mixed supplements/formulations, INGRED= Extracts of plant origin, INGRED= Magnesium, LEGIS= FA-17.1 Food supplements supplied in a solid form including capsules and tablets and similar forms, excluding chewable forms
P0317	A03SS#F04.A0ETZ	The ingredient indicated as Powdered extract of plant origin is ginseng extract.	Herbal formulations and plant extracts, INGRED= Powdered extract of plant origin
P0318	A03SS#F03.A06JH$F04.A0ETY$F33.A0C16	The ingredient indicated as Extracts of plant origin is maca extract.	Herbal formulations and plant extracts, STATE= Tablets, INGRED= Extracts of plant origin, LEGIS= FA-17.1 Food supplements supplied in a solid form including capsules and tablets and similar forms, excluding chewable forms
P0319	A03SS#F04.A0ETY$F33.A0C16	The ingredient indicated as Extracts of plant origin are green tea leaves extracts and guarana seed extract.	Herbal formulations and plant extracts, INGRED= Extracts of plant origin, LEGIS= FA-17.1 Food supplements supplied in a solid form including capsules and tablets and similar forms, excluding chewable forms
P0320	A03SQ#F04.A0CVG		Bee-produced formulations, INGRED= Royal jelly
P0321	A03SS#F04.A0ETY$F33.A0C16	The ingredients indicated as Extracts of plant origin are blackcurrants leaves extract and red grape leaves extract.	Herbal formulations and plant extracts, INGRED= Extracts of plant origin, LEGIS= FA-17.1 Food supplements supplied in a solid form including capsules and tablets and similar forms, excluding chewable forms
P0322	A03SS#F03.A06JH$F04.A00ZQ$F33.A0C16	The ingredient indicated as dried vegetables is vegetable activated charcoal.	Herbal formulations and plant extracts, STATE= Tablets, INGRED= Dried vegetables, LEGIS= FA-17.1 Food supplements supplied in a solid form including capsules and tablets and similar forms, excluding chewable forms
P0323	A03SS#F04.A01MA$F33.A0C16	The ingredient indicated as Dried fruit is pineapple (Ananas sativa) jambs powder.	Herbal formulations and plant extracts, INGRED= Dried fruit, LEGIS= FA-17.1 Food supplements supplied in a solid form including capsules and tablets and similar forms, excluding chewable forms
P0324	A03SS#F03.A06JH$F04.A0ETY$F33.A0C16	The ingredient indicated as Extracts of plant origin are curcuma root extract and black pepper fruit extract.	Herbal formulations and plant extracts, STATE= Tablets, INGRED= Extracts of plant origin, LEGIS= FA-17.1 Food supplements supplied in a solid form including capsules and tablets and similar forms, excluding chewable forms
P0325	A03SS#F04.A016T$F04.A0ETZ$F33.A0C16	The ingredient ìndicated as Dried herbs is burdock root powder. The ingredient indicated as Powdered extract of plant origin is burdock root dry extracts	Herbal formulations and plant extracts, INGRED= Dried herbs, INGRED= Powdered extract of plant origin, LEGIS= FA-17.1 Food supplements supplied in a solid form including capsules and tablets and similar forms, excluding chewable forms
P0326	A03SS#F03.A06JL$F04.A0ETZ$F04.A0EVA$F33.A0C15	The ingredient indicated as Powdered extract of plant origin is birch leaves dry extract. The ingredient indicated as Liquid extract of plant origin is hydroalcoholic extract of birch leaves.	Herbal formulations and plant extracts, STATE= Liquid, INGRED= Powdered extract of plant origin, INGRED= Liquid extract of plant origin, LEGIS= FA-17.2 Food supplements supplied in a liquid form
P0327	A03SS#F04.A016T$F04.A0ETZ$F33.A0C16	The ingredient indicated as Dried herbs is devil's claw root powder . The ingredient indicated as Powdered extract of plant origin is devil's claw root dry extract.	Herbal formulations and plant extracts, INGRED= Dried herbs, INGRED= Powdered extract of plant origin, LEGIS= FA-17.1 Food supplements supplied in a solid form including capsules and tablets and similar forms, excluding chewable forms
P0328	A03SS#F03.A06JH$F04.A016T$F04.A0ETZ$F33.A0C16	The ingredient indicated as Dried herbs is devil's claw root powder. The ingredient indicated as Powdered extract of plant origin is devil's claw root dry extract.	Herbal formulations and plant extracts, STATE= Tablets, INGRED= Dried herbs, INGRED= Powdered extract of plant origin, LEGIS= FA-17.1 Food supplements supplied in a solid form including capsules and tablets and similar forms, excluding chewable forms
P0329	A03SS#F04.A00ZQ$F04.A0ETZ$F33.A0C16	The ingredient indicated as Dried vegetable is garlic bulb powder. The ingredient indicated as Powdered extract of plant origin is garlic bulb dry extract.	Herbal formulations and plant extracts, INGRED= Dried vegetables, INGRED= Powdered extract of plant origin, LEGIS= FA-17.1 Food supplements supplied in a solid form including capsules and tablets and similar forms, excluding chewable forms
P0330	A03TC#F03.A06JH$F04.A01MA$F04.A0ETZ$F04.A0BXY$F33.A0C16	The ingredient indicated as Dried fruit is pineapple blade powder. The ingredient indicated as Powdered extract of plant origin is pineapple blade dry extract. The ingredient indicated as Microbiological or enzymatic ingredients is bromelain.	Mixed supplements/formulations, STATE=Tablets, INGRED=Dried fruit, INGRED=Powdered extract of plant origin, INGRED= Microbiological or enzymatic ingredients, LEGISLATIVE CLASSES=Food supplements supplied in a solid form including capsules and tablets and similar forms, excluding chewable forms
P0331	A03SS#F03.A06JH$F04.A016T$F04.A0ETZ$F33.A0C16	The ingredient indicated as Dried herbs is centella herb powder . The ingredient indicated as Powdered extract of plant origin is centella herb dry extract.	Herbal formulations and plant extracts, STATE= Tablets, INGRED= Dried herbs, INGRED= Powdered extract of plant origin, LEGIS= FA-17.1 Food supplements supplied in a solid form including capsules and tablets and similar forms, excluding chewable forms
P0332	A03ST#F03.A06JH$F04.A00VP$F33.A0C16		Algae based formulations (e.g. Spirulina, chlorella), STATE= Tablets, INGRED= Spirulina, LEGIS= FA-17.1 Food supplements supplied in a solid form including capsules and tablets and similar forms, excluding chewable forms
P0333	A03SS#F03.A06JH$F04.A016T$F04.A0ETZ$F33.A0C16	The ingredient indicated as Dried herbs is dandelion root powder. The ingredient indicated as Powdered extract of plant origin is dandelion root dry extract.	Herbal formulations and plant extracts, STATE= Tablets, INGRED= Dried herbs, INGRED= Powdered extract of plant origin, LEGIS= FA-17.1 Food supplements supplied in a solid form including capsules and tablets and similar forms, excluding chewable forms
P0334	A03SS#F03.A06JH$F04.A0ETZ$F33.A0C16	The ingredient indicated as Powdered extract of plant origin are caraway fruit dry extract, fennel fruit dry extract, mint leaves dry extract.	Herbal formulations and plant extracts, STATE= Tablets, INGRED= Powdered extract of plant origin, LEGIS= FA-17.1 Food supplements supplied in a solid form including capsules and tablets and similar forms, excluding chewable forms
P0335	A03ST#F03.A06JH$F04.A00VK$F33.A0C16	The ingredients indicated as Brown algae are Fucus thallus powder and dry extract.	Algae based formulations (e.g. Spirulina, chlorella), STATE= Tablets, INGRED= Brown algae, LEGIS= FA-17.1 Food supplements supplied in a solid form including capsules and tablets and similar forms, excluding chewable forms
P0336	A03SS#F03.A06JH$F04.A016T$F04.A0ETZ$F33.A0C16	The ingredient indicated as Dried herbs is ginko biloba leaves powder. The ingredient indicated as Powdered extract of plant origin is ginko biloba leaves dry extract.	Herbal formulations and plant extracts, STATE= Tablets, INGRED= Dried herbs, INGRED= Powdered extract of plant origin, LEGIS= FA-17.1 Food supplements supplied in a solid form including capsules and tablets and similar forms, excluding chewable forms
P0337	A03SS#F04.A016T$F04.A0ETZ$F33.A0C16	The ingredient indicated as Dried herbs is green tea powder. The ingredient indicated as Powdered extract of plant origin is green tea dry extract.	Herbal formulations and plant extracts, INGRED= Dried herbs, INGRED= Powdered extract of plant origin, LEGIS= FA-17.1 Food supplements supplied in a solid form including capsules and tablets and similar forms, excluding chewable forms
P0338	A03SS#F04.A016T$F04.A0ETZ$F33.A0C16	The ingredient indicated as Dried herbs is uncaria bark powder. The ingredient indicated as Powdered extract of plant origin is uncaria bark dry extract.	Herbal formulations and plant extracts, INGRED= Dried herbs, INGRED= Powdered extract of plant origin, LEGIS= FA-17.1 Food supplements supplied in a solid form including capsules and tablets and similar forms, excluding chewable forms
P0339	A03TC#F04.A0ETZ$F04.A0EZE$F33.A0C16	The ingredient indicated as Powdered extract of plant origin is greek hay seed dry extract. The ingredients indicated as Inulin and other polyfructoses are inulin and fructo-oligosaccharides.	Mixed supplements/formulations, INGRED= Powdered extract of plant origin, INGRED= Inulin and other polyfructoses, LEGIS= FA-17.1 Food supplements supplied in a solid form including capsules and tablets and similar forms, excluding chewable forms
P0340	A03SS#F04.A016T$F04.A0ETZ$F33.A0C16	The ingredient indicated as Dried herbs is fennel fruit powder. The ingredient indicated as Powdered extract of plant origin is fennel fruit dry extract.	Herbal formulations and plant extracts, INGRED= Dried herbs, INGRED= Powdered extract of plant origin, LEGIS= FA-17.1 Food supplements supplied in a solid form including capsules and tablets and similar forms, excluding chewable forms
P0341	A03SS#F04.A016T$F04.A0ETZ$F33.A0C16	The ingredient indicated as Dried herbs is ginger rhizome powder. The ingredient indicated as Powdered extract of plant origin is ginger rhizime dry extract.	Herbal formulations and plant extracts, INGRED= Dried herbs, INGRED= Powdered extract of plant origin, LEGIS= FA-17.1 Food supplements supplied in a solid form including capsules and tablets and similar forms, excluding chewable forms
P0342	A03SS#F04.A016T$F04.A0ETZ$F33.A0C16	The ingredient indicated as Dried herbs is valerian root powder. The ingredient indicated as Powdered extract of plant origin is valerian root dry extract.	Herbal formulations and plant extracts, INGRED= Dried herbs, INGRED= Powdered extract of plant origin, LEGIS= FA-17.1 Food supplements supplied in a solid form including capsules and tablets and similar forms, excluding chewable forms
P0343	A03TC#F04.A0ETZ$F04.A0EZE$F33.A0C16	The ingredient indicated as Powdered extract of plant origin is maca root dry extract. The ingredients indicated as Inulin and other polyfructoses are inulin and fructo-oligosaccharides.	Mixed supplements/formulations, INGRED= Powdered extract of plant origin, INGRED= Inulin and other polyfructoses, LEGIS= FA-17.1 Food supplements supplied in a solid form including capsules and tablets and similar forms, excluding chewable forms
P0344	A03SS#F04.A016T$F04.A0ETZ$F33.A0C16	The ingredient indicated as Dried herbs is lemon balm leaves powder. The ingredient indicated as Powdered extract of plant origin is lemon balm leaves dry extract.	Herbal formulations and plant extracts, INGRED= Dried herbs, INGRED= Powdered extract of plant origin, LEGIS= FA-17.1 Food supplements supplied in a solid form including capsules and tablets and similar forms, excluding chewable forms
P0345	A03TC#F04.A0ETZ$F04.A0EZE$F33.A0C16	The ingredient indicated as Powdered extract of plant origin is millet fruit dry extract. The ingredients indicated as Inulin and other polyfructoses are inulin and fructo-oligosaccharides.	Mixed supplements/formulations, INGRED= Powdered extract of plant origin, INGRED= Inulin and other polyfructoses, LEGIS= FA-17.1 Food supplements supplied in a solid form including capsules and tablets and similar forms, excluding chewable forms
P0346	A03SS#F04.A016T$F04.A0ETZ$F33.A0C16	The ingredient indicated as Dried herbs is passiflora leaves powder. The ingredient indicated as Powdered extract of plant origin is passiflora leaves dry extract.	Herbal formulations and plant extracts, INGRED= Dried herbs, INGRED= Powdered extract of plant origin, LEGIS= FA-17.1 Food supplements supplied in a solid form including capsules and tablets and similar forms, excluding chewable forms
P0347	A03TC#F04.A0ETZ$F04.A0EZE$F33.A0C16	The ingredient indicated as Powdered extract of plant origin is garcinia fruit dry extract. The ingredients indicated as Inulin and other polyfructoses are inulin and fructo-oligosaccharides.	Mixed supplements/formulations, INGRED= Powdered extract of plant origin, INGRED= Inulin and other polyfructoses, LEGIS= FA-17.1 Food supplements supplied in a solid form including capsules and tablets and similar forms, excluding chewable forms
P0348	A03SS#F04.A00ZQ$F04.A0ETZ$F33.A0C16	The ingredient indicated as Dried vegetable is garlic bulb powder. The ingredient indicated as Powdered extract of plant origin is garlic bulb dry extract.	Herbal formulations and plant extracts, INGRED= Dried vegetables, INGRED= Powdered extract of plant origin, LEGIS= FA-17.1 Food supplements supplied in a solid form including capsules and tablets and similar forms, excluding chewable forms
P0349	A03SS#F04.A016T$F04.A0ETZ$F33.A0C16	The ingredient indicated as Dried herbs is claw root powder. The ingredient indicated as Powdered extract of plant origin is claw root dry extract.	Herbal formulations and plant extracts, INGRED= Dried herbs, INGRED= Powdered extract of plant origin, LEGIS= FA-17.1 Food supplements supplied in a solid form including capsules and tablets and similar forms, excluding chewable forms
P0350	A03TC#F04.A0ETZ$F04.A0EZE$F33.A0C16	The ingredient indicated as Powdered extract of plant origin is milk thistle fruit dry extract. The ingredients indicated as Inulin and other polyfructoses are inulin and fructo-oligosaccharides.	Mixed supplements/formulations, INGRED= Powdered extract of plant origin, INGRED= Inulin and other polyfructoses, LEGIS= FA-17.1 Food supplements supplied in a solid form including capsules and tablets and similar forms, excluding chewable forms
P0351	A03SS#F04.A016T$F04.A0ETZ$F33.A0C16	The ingredient indicated as Dried herbs is birch leaves powder. The ingredient indicated as Powdered extract of plant origin is birch leaves dry extract.	Herbal formulations and plant extracts, INGRED= Dried herbs, INGRED= Powdered extract of plant origin, LEGIS= FA-17.1 Food supplements supplied in a solid form including capsules and tablets and similar forms, excluding chewable forms
P0352	A03SS#F04.A016T$F04.A0ETZ$F33.A0C16	The ingredient indicated as Dried herbs is centella aereal parts powder . The ingredient indicated as Powdered extract of plant origin is centella aereal parts dry extract.	Herbal formulations and plant extracts, INGRED= Dried herbs, INGRED= Powdered extract of plant origin, LEGIS= FA-17.1 Food supplements supplied in a solid form including capsules and tablets and similar forms, excluding chewable forms
P0353	A03SS#F04.A016T$F04.A0ETZ$F33.A0C16	The ingredient indicated as Dried herbs is hawthorn leaves and flowers powder. The ingredient indicated as Powdered extract of plant origin is hawthorn leaves and flowers dry extract.	Herbal formulations and plant extracts, INGRED= Dried herbs, INGRED= Powdered extract of plant origin, LEGIS= FA-17.1 Food supplements supplied in a solid form including capsules and tablets and similar forms, excluding chewable forms
P0354	A03TC#F04.A0ETZ$F04.A0EZE$F33.A0C16	The ingredient indicated as Powdered extract of plant origin is Resin dry extract of Boswellia serrata, -Incense-. The ingredients indicated as Inulin and other polyfructoses are inulin and fructo-oligosaccharides.	Mixed supplements/formulations, INGRED= Powdered extract of plant origin, INGRED= Inulin and other polyfructoses, LEGIS= FA-17.1 Food supplements supplied in a solid form including capsules and tablets and similar forms, excluding chewable forms
P0355	A03SS#F04.A016T$F04.A0ETZ$F33.A0C16	The ingredient indicated as Dried herbs is damiana leaves powder . The ingredient indicated as Powdered extract of plant origin is damiana leaves dry extract.	Herbal formulations and plant extracts, INGRED= Dried herbs, INGRED= Powdered extract of plant origin, LEGIS= FA-17.1 Food supplements supplied in a solid form including capsules and tablets and similar forms, excluding chewable forms
P0356	A03SS#F04.A016T$F04.A0ETZ$F33.A0C16	The ingredient indicated as Dried herbs is echinacea root powder. The ingredient indicated as Powdered extract of plant origin is echinacea root dry extract.	Herbal formulations and plant extracts, INGRED= Dried herbs, INGRED= Powdered extract of plant origin, LEGIS= FA-17.1 Food supplements supplied in a solid form including capsules and tablets and similar forms, excluding chewable forms
P0357	A03SS#F04.A016T$F04.A0ETZ$F33.A0C16	The ingredient indicated as Dried herbs is eleutherococcus root powder. The ingredient indicated as Powdered extract of plant origin is eleutherococcus root dry extract.	Herbal formulations and plant extracts, INGRED= Dried herbs, INGRED= Powdered extract of plant origin, LEGIS= FA-17.1 Food supplements supplied in a solid form including capsules and tablets and similar forms, excluding chewable forms
P0358	A03SS#F04.A016T$F04.A0ETZ$F33.A0C16	The ingredient indicated as Dried herbs is horsetail sterile stems powder . The ingredient indicated as Powdered extract of plant origin is Horsetail sterile stems dry extract.	Herbal formulations and plant extracts, INGRED= Dried herbs, INGRED= Powdered extract of plant origin, LEGIS= FA-17.1 Food supplements supplied in a solid form including capsules and tablets and similar forms, excluding chewable forms
P0359	A03SS#F04.A00ZQ$F33.A0C16	The ingredient indicated as Dried vegetables is grass of wheat young leaves powder.	Herbal formulations and plant extracts, INGRED= Dried vegetables, LEGIS= FA-17.1 Food supplements supplied in a solid form including capsules and tablets and similar forms, excluding chewable forms
P0360	A03TC#F04.A0ETZ$F04.A0EZE$F33.A0C16	The ingredient indicated as Powdered extract of plant origin is griffonia seed dry extract. The ingredients indicated as Inulin and other polyfructoses are inulin and fructo-oligosaccharides.	Mixed supplements/formulations, INGRED= Powdered extract of plant origin, INGRED= Inulin and other polyfructoses, LEGIS= FA-17.1 Food supplements supplied in a solid form including capsules and tablets and similar forms, excluding chewable forms
P0361	A03ST#F03.A06JH$F04.A00VP$F04.A0DCP$F33.A0C16	The ingredient indicated as Other algae is Klamath alga, a green-blue alga.	Algae based formulations (e.g. Spirulina, chlorella), STATE= Tablets, INGRED= Spirulina, INGRED= Other algae, LEGIS= FA-17.1 Food supplements supplied in a solid form including capsules and tablets and similar forms, excluding chewable forms
P0362	A03SS#F04.A03CG$F33.A0C16	The ingredient indicated as Dehydrated/powdered fruit juice is powder of apple vinegar .	Herbal formulations and plant extracts, INGRED= Dehydrated/powdered fruit juice, LEGIS= FA-17.1 Food supplements supplied in a solid form including capsules and tablets and similar forms, excluding chewable forms
P0363	A03SS#F04.A0ETZ$F33.A0C16	The ingredient indicated as Powdered extract of plant origin is griffonia seed dry extract.	Herbal formulations and plant extracts, INGRED= Powdered extract of plant origin, LEGIS= FA-17.1 Food supplements supplied in a solid form including capsules and tablets and similar forms, excluding chewable forms
P0364	A03SS#F04.A0ETZ$F33.A0C16	The ingredient indicated as Powdered extract of plant origin is garlic bulb dry extract.	Herbal formulations and plant extracts, INGRED= Powdered extract of plant origin, LEGIS= FA-17.1 Food supplements supplied in a solid form including capsules and tablets and similar forms, excluding chewable forms
P0365	A03SS#F04.A016T$F04.A0ETZ$F33.A0C16	The ingredients indicated as Dried herbs are whitethorn flowers and leaves powder and mistletoe leaves powder. The ingredients indicated as Powdered extract of plant origin are garlic bulbs dry extract and whitethorn flowers and leaves dry extract.	Herbal formulations and plant extracts, INGRED= Dried herbs, INGRED= Powdered extract of plant origin, LEGIS= FA-17.1 Food supplements supplied in a solid form including capsules and tablets and similar forms, excluding chewable forms
P0366	A03ST#F04.A00VK$F33.A0C16	The ingredient indicated as Brown algae is Fucus.	Algae based formulations (e.g. Spirulina, chlorella), INGRED= Brown algae, LEGIS= FA-17.1 Food supplements supplied in a solid form including capsules and tablets and similar forms, excluding chewable forms
P0367	A03TC#F04.A0ETZ$F04.A0BXY$F33.A0C16	The ingredient indicated as Powdered extract of plant origin is pineapple dry extract. The ingredient indicated as Microbiological or enzymatic ingredients is bromelain.	Mixed supplements/formulations, INGRED= Powdered extract of plant origin, INGRED= Microbiological or enzymatic ingredients, LEGIS= FA-17.1 Food supplements supplied in a solid form including capsules and tablets and similar forms, excluding chewable forms
P0368	A03SS#F04.A0ETZ$F33.A0C16	The ingredient indicated as Powdered extract of plant origin is devil's claw root dry extract.	Herbal formulations and plant extracts, INGRED= Powdered extract of plant origin, LEGIS= FA-17.1 Food supplements supplied in a solid form including capsules and tablets and similar forms, excluding chewable forms
P0369	A03SS#F04.A0ETZ$F33.A0C16	The ingredient indicated as Powdered extract of plant origin is burdock root dry extracts.	Herbal formulations and plant extracts, INGRED= Powdered extract of plant origin, LEGIS= FA-17.1 Food supplements supplied in a solid form including capsules and tablets and similar forms, excluding chewable forms
P0370	A03SS#F03.A06JH$F04.A00ZQ$F33.A0C16	The ingredient indicated as Dried Vegetables is vegetable charcoal.	Herbal formulations and plant extracts, STATE= Tablets, INGRED= Dried vegetables, LEGIS= FA-17.1 Food supplements supplied in a solid form including capsules and tablets and similar forms, excluding chewable forms
P0371	A03SS#F04.A0ETZ$F33.A0C16	The ingredient indicated as Powdered extract of plant origin is cranberry dry extracts.	Herbal formulations and plant extracts, INGRED= Powdered extract of plant origin, LEGIS= FA-17.1 Food supplements supplied in a solid form including capsules and tablets and similar forms, excluding chewable forms
P0372	A03SS#F04.A016T$F04.A0ETZ$F33.A0C16	The ingredient indicated as Dried herbs is horsetail powder. The ingredient indicated as Powdered extract of plant origin is horsetail dry extract.	Herbal formulations and plant extracts, INGRED= Dried herbs, INGRED= Powdered extract of plant origin, LEGIS= FA-17.1 Food supplements supplied in a solid form including capsules and tablets and similar forms, excluding chewable forms
P0373	A03SS#F04.A016T$F04.A0ETZ$F33.A0C16	The ingredient indicated as Dried herbs is greek Hay seed powder. The ingredient indicated as powdered extract of plant origin is greek hay seed dry extract.	Herbal formulations and plant extracts, INGRED= Dried herbs, INGRED= Powdered extract of plant origin, LEGIS= FA-17.1 Food supplements supplied in a solid form including capsules and tablets and similar forms, excluding chewable forms
P0374	A03SS#F04.A0ETZ$F33.A0C16	The ingredient indicated as powdered extract of plant origin are Reishi sporophore dry extract, Cordyceps sporophore , Maitake sporophore.	Herbal formulations and plant extracts, INGRED= Powdered extract of plant origin, LEGIS= FA-17.1 Food supplements supplied in a solid form including capsules and tablets and similar forms, excluding chewable forms
P0375	A03SS#F04.A0ETZ$F33.A0C16	The ingredient indicated as Powdered extract of plant origin is camboge tree fruit.	Herbal formulations and plant extracts, INGRED= Powdered extract of plant origin, LEGIS= FA-17.1 Food supplements supplied in a solid form including capsules and tablets and similar forms, excluding chewable forms
P0376	A03SS#F04.A016T$F04.A0ETZ$F33.A0C16	The ingredient indicated as Dried herbs is ginkgo leaves powder. The ingredient indicated as Powdered extract of plant origin is ginkgo leaves dry extract.	Herbal formulations and plant extracts, INGRED= Dried herbs, INGRED= Powdered extract of plant origin, LEGIS= FA-17.1 Food supplements supplied in a solid form including capsules and tablets and similar forms, excluding chewable forms
P0377	A03SR#F04.A00ZS$F33.A0C16	The ingredient indicated as Starchy roots and tubers is tuber (Amorphophallus konjac).	Fiber supplements, INGRED= Starchy roots and tubers, LEGIS= FA-17.1 Food supplements supplied in a solid form including capsules and tablets and similar forms, excluding chewable forms
P0378	A03SS#F04.A0ETZ$F33.A0C16	The ingredient indicated as Powdered extract of plant origin is soursop fruit dry extracts.	Herbal formulations and plant extracts, INGRED= Powdered extract of plant origin, LEGIS= FA-17.1 Food supplements supplied in a solid form including capsules and tablets and similar forms, excluding chewable forms
P0379	A03SS#F04.A0ETZ$F33.A0C16	The ingredient indicated as Powdered extract of plant origin is griffonia seeds dry extracts.	Herbal formulations and plant extracts, INGRED= Powdered extract of plant origin, LEGIS= FA-17.1 Food supplements supplied in a solid form including capsules and tablets and similar forms, excluding chewable forms
P0380	A03SS#F04.A016T$F04.A0ETZ$F33.A0C16	The ingredient indicated as Dried herbs is gymnema leaves powder. The ingredient indicated as Powdered extract of plant origin is gymnema leaves dry extract.	Herbal formulations and plant extracts, INGRED= Dried herbs, INGRED= Powdered extract of plant origin, LEGIS= FA-17.1 Food supplements supplied in a solid form including capsules and tablets and similar forms, excluding chewable forms
P0381	A03SS#F04.A0ETZ$F33.A0C16	The ingredient indicated as Powdered extract of plant origin is blueberry dry extracts.	Herbal formulations and plant extracts, INGRED= Powdered extract of plant origin, LEGIS= FA-17.1 Food supplements supplied in a solid form including capsules and tablets and similar forms, excluding chewable forms
P0382	A03SS#F04.A0ETZ$F33.A0C16	The ingredients indicated as Powdered extract of plant origin are artichoke leaves and taraxacum root dry extracts.	Herbal formulations and plant extracts, INGRED= Powdered extract of plant origin, LEGIS= FA-17.1 Food supplements supplied in a solid form including capsules and tablets and similar forms, excluding chewable forms
P0383	A03SS#F04.A016T$F04.A0ETZ$F33.A0C16	The ingredient indicated as Dried herbs is cat’s claw bark powder. The ingredient indicated as Powdered extract of plant origin is cat’s claw bark dry extract.	Herbal formulations and plant extracts, INGRED= Dried herbs, INGRED= Powdered extract of plant origin, LEGIS= FA-17.1 Food supplements supplied in a solid form including capsules and tablets and similar forms, excluding chewable forms
P0384	A03SS#F04.A016T$F04.A0ETZ$F33.A0C16	The ingredient indicated as Dried herbs is valerian root powder. The ingredient indicated as Powdered extract of plant origin is valerian root dry extract.	Herbal formulations and plant extracts, INGRED= Dried herbs, INGRED= Powdered extract of plant origin, LEGIS= FA-17.1 Food supplements supplied in a solid form including capsules and tablets and similar forms, excluding chewable forms
P0385	A03SS#F04.A016T$F04.A0ETZ$F33.A0C16	The ingredient indicated as Dried herbs is ginger rhizome powder. The ingredient indicated as Powdered extract of plant origin is ginger rhizome dry extract.	Herbal formulations and plant extracts, INGRED= Dried herbs, INGRED= Powdered extract of plant origin, LEGIS= FA-17.1 Food supplements supplied in a solid form including capsules and tablets and similar forms, excluding chewable forms
P0386	A03SN#F03.A06JH$F04.A0EXN$F04.A0EXD$F33.A0C16		Combination of vitamin and mineral only supplements, STATE= Tablets, INGRED= Vitamin C (ascorbic acid), INGRED= Iron, LEGIS= FA-17.1 Food supplements supplied in a solid form including capsules and tablets and similar forms, excluding chewable forms
P0387	A03SN#F03.A06JH$F04.A0EXN$F04.A0EXD$F04.A0EXY$F04.A0EXX$F04.A0EXV$F04.A0EXS$F04.A0EXQ$F04.A0EXP$F04.A0EXB$F33.A0C16		Combination of vitamin and mineral only supplements, STATE= Tablets, INGRED= Vitamin C (ascorbic acid), INGRED= Iron, INGRED= Vitamin B1 (thiamine), INGRED= Vitamin B2 (riboflavin), INGRED= Vitamin B3 (niacin, niacinamide), INGRED= Vitamin B6 (pyridoxine, pyridoxamine, pyridoxal), INGRED= Vitamin B9 (folic acid, folinic acid), INGRED= Vitamin B12 (cyanocobalamin, hydroxocobalamin, methylcobalamin…
P0388	A03SL#F03.A06JH$F04.A0EXQ$F33.A0C16		Vitamin only supplements, STATE= Tablets, INGRED= Vitamin B9 (folic acid, folinic acid), LEGIS= FA-17.1 Food supplements supplied in a solid form including capsules and tablets and similar forms, excluding chewable forms
P0389	A03SS#F04.A0ETZ$F33.A0C16	The ingredient indicated as Powdered extract of plant origin is kamu kamu fruit dry extract.	Herbal formulations and plant extracts, INGRED= Powdered extract of plant origin, LEGIS= FA-17.1 Food supplements supplied in a solid form including capsules and tablets and similar forms, excluding chewable forms
P0390	A03SM#F04.A0EXJ		Mineral only supplements, INGRED= Potassium
P0391	A03SS#F04.A0ETZ	The ingredient indicated as Powdered extract of plant origin is soy extract rich on lecithin.	Herbal formulations and plant extracts, INGRED= Powdered extract of plant origin
P0392	A03TB#F03.A06JH$F33.A0C16		Yeast based formulations, STATE= Tablets, LEGIS= FA-17.1 Food supplements supplied in a solid form including capsules and tablets and similar forms, excluding chewable forms
P0393	A03SM#F03.A06JH$F04.A0EXF$F33.A0C16		Mineral only supplements, STATE= Tablets, INGRED= Magnesium, LEGIS= FA-17.1 Food supplements supplied in a solid form including capsules and tablets and similar forms, excluding chewable forms
P0394	A03SM#F03.A06JH$F04.A0EXE$F33.A0C16		Mineral only supplements, STATE= Tablets, INGRED= Zinc, LEGIS= FA-17.1 Food supplements supplied in a solid form including capsules and tablets and similar forms, excluding chewable forms
P0395	A03ST#F04.A0DCP$F33.A0C16	The ingredient indicated as Other algae is Klamath alga, a green-blue alga.	Algae based formulations (e.g. Spirulina, chlorella), INGRED= Other algae, LEGIS= FA-17.1 Food supplements supplied in a solid form including capsules and tablets and similar forms, excluding chewable forms
P0396	A03SS#F04.A0ETZ$F33.A0C16	The ingredient indicated as Powdered extract of plant origin are curcuma root dry extract and black pepper dry extract.	Herbal formulations and plant extracts, INGRED= Powdered extract of plant origin, LEGIS= FA-17.1 Food supplements supplied in a solid form including capsules and tablets and similar forms, excluding chewable forms
P0397	A03SS#F03.A06JH$F04.A0ETZ$F33.A0C16	The ingredients indicated as powdered extract of plant origin are pineapple stem dry extract , butcher's broom rhizome dry extract , centella leaves dry extract.	Herbal formulations and plant extracts, STATE= Tablets, INGRED= Powdered extract of plant origin, LEGIS= FA-17.1 Food supplements supplied in a solid form including capsules and tablets and similar forms, excluding chewable forms
P0398	A03SS#F03.A06JH$F04.A0ETZ$F33.A0C16	The ingredients indicated as powdered extract of plant origin are dog rose fruits dry extract , black cranberry fruits dry extract , Mexican marigold dry extract , red grapes leaves dry extracts.	Herbal formulations and plant extracts, STATE= Tablets, INGRED= Powdered extract of plant origin, LEGIS= FA-17.1 Food supplements supplied in a solid form including capsules and tablets and similar forms, excluding chewable forms
P0399	A03TC#F03.A06JH$F04.A0ETZ$F04.A0EXF$F04.A0EXJ$F33.A0C16	The ingredients indicated as powdered extract of plant origin are hawkweed whole plant dry extract and goldenrod top flowering dry extract.	Mixed supplements/formulations, STATE= Tablets, INGRED= Powdered extract of plant origin, INGRED= Magnesium, INGRED= Potassium, LEGIS= FA-17.1 Food supplements supplied in a solid form including capsules and tablets and similar forms, excluding chewable forms
P0400	A03SS#F04.A016T$F33.A0C16	The ingredient indicated as Dried herbs is pilosella whole plant dry extract.	Herbal formulations and plant extracts, INGRED= Dried herbs, LEGIS= FA-17.1 Food supplements supplied in a solid form including capsules and tablets and similar forms, excluding chewable forms
P0401	A03SS#F03.A06JH$F04.A016T$F04.A0ETZ$F33.A0C16	The ingredient indicated as Dried herbs is devil's claw root powder. The ingredient indicated as powdered extract of plant origin is devil's claw root dry extract.	Herbal formulations and plant extracts, STATE= Tablets, INGRED= Dried herbs, INGRED= Powdered extract of plant origin, LEGIS= FA-17.1 Food supplements supplied in a solid form including capsules and tablets and similar forms, excluding chewable forms
P0402	A03SS#F03.A06JH$F04.A016T$F04.A0ETZ$F33.A0C16	The ingredient indicated as Dried herbs is chaste tree fruit powder. The ingredient indicated as Powdered extract of plant origin is chaste tree fruit dry extract.	Herbal formulations and plant extracts, STATE= Tablets, INGRED= Dried herbs, INGRED= Powdered extract of plant origin, LEGIS= FA-17.1 Food supplements supplied in a solid form including capsules and tablets and similar forms, excluding chewable forms
P0403	A03SS#F03.A06JH$F04.A016T$F04.A0ETZ$F33.A0C16	The ingredient indicated as Dried herbs is boswellia -Incense- powder. The ingredient indicated as Powdered extract of plant origin is boswellia -Incense- dry extract.	Herbal formulations and plant extracts, STATE= Tablets, INGRED= Dried herbs, INGRED= Powdered extract of plant origin, LEGIS= FA-17.1 Food supplements supplied in a solid form including capsules and tablets and similar forms, excluding chewable forms
P0404	A03SS#F03.A06JH$F04.A00ZQ$F04.A0ETZ$F33.A0C16	The ingredient indicated as Dried vegetables is artichoke leaves powder. The ingredient indicated as Powdered extract of plant origin is artichoke leaves dry extract.	Herbal formulations and plant extracts, STATE= Tablets, INGRED= Dried vegetables, INGRED= Powdered extract of plant origin, LEGIS= FA-17.1 Food supplements supplied in a solid form including capsules and tablets and similar forms, excluding chewable forms
P0405	A03SS#F03.A06JH$F04.A00ZQ$F04.A0ETZ$F33.A0C16	The ingredient indicated as Dried vegetables is milk thistle aereal parts powder . The ingredient indicated as Powdered extract of plant origin is milk thistle aereal parts dry extract.	Herbal formulations and plant extracts, STATE= Tablets, INGRED= Dried vegetables, INGRED= Powdered extract of plant origin, LEGIS= FA-17.1 Food supplements supplied in a solid form including capsules and tablets and similar forms, excluding chewable forms
P0406	A03SS#F03.A06JH$F04.A016T$F33.A0C16	The ingredient indicated as Dried herbs is centella asiatica leaves powder.	Herbal formulations and plant extracts, STATE= Tablets, INGRED= Dried herbs, LEGIS= FA-17.1 Food supplements supplied in a solid form including capsules and tablets and similar forms, excluding chewable forms
P0407	A03SS#F03.A06JH$F04.A016T$F04.A0ETZ$F33.A0C16	The ingredient indicated as Dried herbs is chrysanthellum aereal parts powder. The ingredient indicated as Powdered extract of plant origin is chrysanthellum aereal parts dry extract.	Herbal formulations and plant extracts, STATE= Tablets, INGRED= Dried herbs, INGRED= Powdered extract of plant origin, LEGIS= FA-17.1 Food supplements supplied in a solid form including capsules and tablets and similar forms, excluding chewable forms
P0408	A03SS#F04.A016T$F04.A0ETZ$F33.A0C16	The ingredients indicated as Dried herbs are turmeric rhizome powder and long pepper fruit powder. The ingredient indicated as Powdered extract of plant origin is turmeric rhizome dry extract.	Herbal formulations and plant extracts, INGRED= Dried herbs, INGRED= Powdered extract of plant origin, LEGIS= FA-17.1 Food supplements supplied in a solid form including capsules and tablets and similar forms, excluding chewable forms
P0409	A03SS#F03.A06JH$F04.A016T$F33.A0C16	The ingredient indicated as Dried herbs is tick-trefoil leaves powder.	Herbal formulations and plant extracts, STATE= Tablets, INGRED= Dried herbs, LEGIS= FA-17.1 Food supplements supplied in a solid form including capsules and tablets and similar forms, excluding chewable forms
P0410	A03SS#F03.A06JH$F04.A016T$F04.A0ETZ$F33.A0C16	The ingredient indicated as Dried herbs is echinacea root powder. The ingredient indicated as Powdered extract of plant origin is echinacea root dry extract.	Herbal formulations and plant extracts, STATE= Tablets, INGRED= Dried herbs, INGRED= Powdered extract of plant origin, LEGIS= FA-17.1 Food supplements supplied in a solid form including capsules and tablets and similar forms, excluding chewable forms
P0411	A03SS#F03.A06JH$F04.A016T$F04.A0ETZ$F33.A0C16	The ingredient indicated as Dried herbs is equiseto aereal parts powder. The ingredient indicated as Powdered extract of plant origin is equiseto aereal parts dry extract.	Herbal formulations and plant extracts, STATE= Tablets, INGRED= Dried herbs, INGRED= Powdered extract of plant origin, LEGIS= FA-17.1 Food supplements supplied in a solid form including capsules and tablets and similar forms, excluding chewable forms
P0412	A03ST#F03.A06JH$F04.A00VK$F33.A0C16	The ingredients indicated as Brown algae are fucus thallus powder and dry extract	Algae based formulations (e.g. Spirulina, chlorella), STATE= Tablets, INGRED= Brown algae, LEGIS= FA-17.1 Food supplements supplied in a solid form including capsules and tablets and similar forms, excluding chewable forms
P0413	A03SS#F03.A06JH$F04.A016T$F04.A0ETZ$F33.A0C16	The ingredient indicated as Dried herbs is ginkgo biloba leaves powder. The ingredient indicated as Powdered extract of plant origin is Ginkgo Biloba leaves dry extract.	Herbal formulations and plant extracts, STATE= Tablets, INGRED= Dried herbs, INGRED= Powdered extract of plant origin, LEGIS= FA-17.1 Food supplements supplied in a solid form including capsules and tablets and similar forms, excluding chewable forms
P0414	A03SS#F03.A06JH$F04.A0ETZ$F33.A0C16	The ingredient indicated as Powdered extract of plant origin is griffonia seed dry extract.	Herbal formulations and plant extracts, STATE= Tablets, INGRED= Powdered extract of plant origin, LEGIS= FA-17.1 Food supplements supplied in a solid form including capsules and tablets and similar forms, excluding chewable forms
P0415	A03SS#F03.A06JH$F04.A016T$F04.A00ZQ$F04.A0ETZ$F33.A0C16	The ingredient indicated as Dried herbs is perforate St John's-wort flowers powder. The ingredient indicated as Dried vegetables is chicory. The ingredient indicated as powdered extract of plant origin is perforate St John's-wort flowers dry extract.	Herbal formulations and plant extracts, STATE= Tablets, INGRED= Dried herbs, INGRED= Dried vegetables, INGRED= Powdered extract of plant origin, LEGIS= FA-17.1 Food supplements supplied in a solid form including capsules and tablets and similar forms, excluding chewable forms
P0416	A03SS#F03.A06JH$F04.A01MA$F04.A0ETZ$F33.A0C16	The ingredient indicated as Dried fruit is organic blueberry powder. The ingredient indicated as Powdered extract of plant origin is blueberry dry extract.	Herbal formulations and plant extracts, STATE= Tablets, INGRED= Dried fruit, INGRED= Powdered extract of plant origin, LEGIS= FA-17.1 Food supplements supplied in a solid form including capsules and tablets and similar forms, excluding chewable forms
P0417	A03SS#F03.A06JH$F04.A00ZQ$F33.A0C16	The ingredient indicated as Dried vegetables is nopal sholves powder.	Herbal formulations and plant extracts, STATE= Tablets, INGRED= Dried vegetables, LEGIS= FA-17.1 Food supplements supplied in a solid form including capsules and tablets and similar forms, excluding chewable forms
P0418	A03SS#F03.A06JH$F04.A016T$F04.A0ETZ$F33.A0C16	The ingredient indicated as Dried herbs is passion flower powder. The ingredient indicated as Powdered extract of plant origin is passion flower dry extract.	Herbal formulations and plant extracts, STATE= Tablets, INGRED= Dried herbs, INGRED= Powdered extract of plant origin, LEGIS= FA-17.1 Food supplements supplied in a solid form including capsules and tablets and similar forms, excluding chewable forms
P0419	A03SS#F03.A06JH$F04.A00ZQ$F33.A0C16	The ingredient indicated as Dried vegetables is pau d' arco bark powder.	Herbal formulations and plant extracts, STATE= Tablets, INGRED= Dried vegetables, LEGIS= FA-17.1 Food supplements supplied in a solid form including capsules and tablets and similar forms, excluding chewable forms
P0420	A03SS#F04.A016T$F33.A0C16	The ingredient indicated as Dried herbs is black pepper powder.	Herbal formulations and plant extracts, INGRED= Dried herbs, LEGIS= FA-17.1 Food supplements supplied in a solid form including capsules and tablets and similar forms, excluding chewable forms
P0421	A03SS#F03.A06JH$F04.A00ZQ$F04.A0ETZ$F33.A0C16	The ingredient indicated as Dried vegetables is willow bark powder. The ingredient indicated as Powdered extract of plant origin is willow bark dry extract.	Herbal formulations and plant extracts, STATE= Tablets, INGRED= Dried vegetables, INGRED= Powdered extract of plant origin, LEGIS= FA-17.1 Food supplements supplied in a solid form including capsules and tablets and similar forms, excluding chewable forms
P0422	A03SS#F04.A016T$F33.A0C16	The ingredient indicated as Dried herbs is goldenrod aereal parts powder.	Herbal formulations and plant extracts, INGRED= Dried herbs, LEGIS= FA-17.1 Food supplements supplied in a solid form including capsules and tablets and similar forms, excluding chewable forms
P0423	A03SS#F03.A06JH$F04.A016T$F04.A0ETZ$F33.A0C16	The ingredient indicated as Dried herbs is dandelion root powder. The ingredient indicated as Powdered extract of plant origin is dandelion root dry extract.	Herbal formulations and plant extracts, STATE= Tablets, INGRED= Dried herbs, INGRED= Powdered extract of plant origin, LEGIS= FA-17.1 Food supplements supplied in a solid form including capsules and tablets and similar forms, excluding chewable forms
P0424	A03SS#F03.A06JH$F04.A016T$F04.A0ETZ$F33.A0C16	The ingredient indicated as Dried herbs is green tea leaves powder. The ingredient indicated as Powdered extract of plant origin is green tea leaves dry extract.	Herbal formulations and plant extracts, STATE= Tablets, INGRED= Dried herbs, INGRED= Powdered extract of plant origin, LEGIS= FA-17.1 Food supplements supplied in a solid form including capsules and tablets and similar forms, excluding chewable forms
P0425	A03SS#F03.A06JH$F04.A016T$F04.A0ETZ$F33.A0C16	The ingredient indicated as Dried herbs is cat's claw root powder. The ingredient indicated as Powdered extract of plant origin is at's claw root dry extract.	Herbal formulations and plant extracts, STATE= Tablets, INGRED= Dried herbs, INGRED= Powdered extract of plant origin, LEGIS= FA-17.1 Food supplements supplied in a solid form including capsules and tablets and similar forms, excluding chewable forms
P0426	A03SS#F03.A06JH$F04.A016T$F04.A0ETZ$F33.A0C16	The ingredient indicated as Dried herbs is ashwagandha root powder. The ingredient indicated as Powdered extract of plant origin is ashwagandha root dry extract.	Herbal formulations and plant extracts, STATE= Tablets, INGRED= Dried herbs, INGRED= Powdered extract of plant origin, LEGIS= FA-17.1 Food supplements supplied in a solid form including capsules and tablets and similar forms, excluding chewable forms
P0427	A03TC#F03.A06JH$F04.A016T$F04.A0CVF$F33.A0C16	The ingredients indicated as Dried herbs are dog rose and myrrh powder. The ingredient indicated as Other edible apiculture products is Propolis dry extract.	Mixed supplements/formulations, STATE= Tablets, INGRED= Dried herbs, INGRED=Other edible apiculture products, LEGIS= FA-17.1 Food supplements supplied in a solid form including capsules and tablets and similar forms, excluding chewable forms
P0428	A03SQ#F03.A06JL$F04.A0CVF$F33.A0C15	The ingredient indicated as Other edible apiculture products is hydroalcoholic extract of organic propolis.	Bee-produced formulations, STATE= Liquid, INGRED=Other edible apiculture products, LEGIS= FA-17.2 Food supplements supplied in a liquid form
P0429	A03SQ#F03.A06JL$F04.A0CVF$F33.A0C15	The ingredient indicated as Other edible apiculture products is water extract of organic propolis.	Bee-produced formulations, STATE= Liquid, INGRED=Other edible apiculture products, LEGIS= FA-17.2 Food supplements supplied in a liquid form
P0430	A03SS#F03.A06JH$F04.A0ETZ$F33.A0C16	The ingredient indicated as Powdered extract of plant origin is açai fruit dry extract.	Herbal formulations and plant extracts, STATE= Tablets, INGRED= Powdered extract of plant origin, LEGIS= FA-17.1 Food supplements supplied in a solid form including capsules and tablets and similar forms, excluding chewable forms
P0431	A03SS#F03.A06JH$F04.A0ETZ$F33.A0C16	The ingredient indicated as Powdered extract of plant origin is andrographys aereal parts dry extract.	Herbal formulations and plant extracts, STATE= Tablets, INGRED= Powdered extract of plant origin, LEGIS= FA-17.1 Food supplements supplied in a solid form including capsules and tablets and similar forms, excluding chewable forms
P0432	A03SS#F03.A06JH$F04.A0ETZ$F33.A0C16	The ingredient indicated as Powdered extract of plant origin is Chinese Angelica root dry extract.	Herbal formulations and plant extracts, STATE= Tablets, INGRED= Powdered extract of plant origin, LEGIS= FA-17.1 Food supplements supplied in a solid form including capsules and tablets and similar forms, excluding chewable forms
P0433	A03SS#F03.A06JH$F04.A0ETZ$F33.A0C16	The ingredient indicated as Powdered extract of plant origin is devil's claw root dry extract.	Herbal formulations and plant extracts, STATE= Tablets, INGRED= Powdered extract of plant origin, LEGIS= FA-17.1 Food supplements supplied in a solid form including capsules and tablets and similar forms, excluding chewable forms
P0434	A03SS#F03.A06JH$F04.A0ETZ$F33.A0C16	The ingredient indicated as Powdered extract of plant origin is astragalus root dry extract.	Herbal formulations and plant extracts, STATE= Tablets, INGRED= Powdered extract of plant origin, LEGIS= FA-17.1 Food supplements supplied in a solid form including capsules and tablets and similar forms, excluding chewable forms
P0435	A03SS#F03.A06JH$F04.A0ETZ$F33.A0C16	The ingredient indicated as Powdered extract of plant origin is bacopa leaves dry extract.	Herbal formulations and plant extracts, STATE= Tablets, INGRED= Powdered extract of plant origin, LEGIS= FA-17.1 Food supplements supplied in a solid form including capsules and tablets and similar forms, excluding chewable forms
P0436	A03SS#F03.A06JH$F04.A0ETZ$F33.A0C16	The ingredient indicated as Powdered extract of plant origin is hawthorn leaves and flowers dry extract.	Herbal formulations and plant extracts, STATE= Tablets, INGRED= Powdered extract of plant origin, LEGIS= FA-17.1 Food supplements supplied in a solid form including capsules and tablets and similar forms, excluding chewable forms
P0437	A03SS#F03.A06JH$F04.A0ETZ$F33.A0C16	The ingredient indicated as Powdered extract of plant origin is boswellia gum resin dry extract.	Herbal formulations and plant extracts, STATE= Tablets, INGRED= Powdered extract of plant origin, LEGIS= FA-17.1 Food supplements supplied in a solid form including capsules and tablets and similar forms, excluding chewable forms
P0438	A03SS#F03.A06JH$F04.A0ETZ$F33.A0C16	The ingredient indicated as Powdered extract of plant origin is green coffee seed dry extract.	Herbal formulations and plant extracts, STATE= Tablets, INGRED= Powdered extract of plant origin, LEGIS= FA-17.1 Food supplements supplied in a solid form including capsules and tablets and similar forms, excluding chewable forms
P0439	A03SS#F03.A06JH$F04.A0ETZ$F33.A0C16	The ingredient indicated as Powdered extract of plant origin is artichoke leaves dry extract.	Herbal formulations and plant extracts, STATE= Tablets, INGRED= Powdered extract of plant origin, LEGIS= FA-17.1 Food supplements supplied in a solid form including capsules and tablets and similar forms, excluding chewable forms
P0440	A03SS#F03.A06JH$F04.A0ETZ$F33.A0C16	The ingredient indicated as Powdered extract of plant origin is milk thistle achenes dry extract.	Herbal formulations and plant extracts, STATE= Tablets, INGRED= Powdered extract of plant origin, LEGIS= FA-17.1 Food supplements supplied in a solid form including capsules and tablets and similar forms, excluding chewable forms
P0441	A03SS#F03.A06JH$F04.A0ETZ$F33.A0C16	The ingredient indicated as Powdered extract of plant origin is centella aereal parts dry extract.	Herbal formulations and plant extracts, STATE= Tablets, INGRED= Powdered extract of plant origin, LEGIS= FA-17.1 Food supplements supplied in a solid form including capsules and tablets and similar forms, excluding chewable forms
P0442	A03SS#F03.A06JH$F04.A0ETZ$F33.A0C16	The ingredient indicated as Powdered extract of plant origin is chrysanthellum aereal parts dry extract.	Herbal formulations and plant extracts, STATE= Tablets, INGRED= Powdered extract of plant origin, LEGIS= FA-17.1 Food supplements supplied in a solid form including capsules and tablets and similar forms, excluding chewable forms
P0443	A03SS#F03.A06JH$F04.A0ETZ$F33.A0C16	The ingredient indicated as Powdered extract of plant origin is black cohosh root dry extract.	Herbal formulations and plant extracts, STATE= Tablets, INGRED= Powdered extract of plant origin, LEGIS= FA-17.1 Food supplements supplied in a solid form including capsules and tablets and similar forms, excluding chewable forms
P0444	A03SS#F03.A06JH$F04.A0ETZ$F33.A0C16	The ingredient indicated as Powdered extract of plant origin is poor man's ginseng root dry extract.	Herbal formulations and plant extracts, STATE= Tablets, INGRED= Powdered extract of plant origin, LEGIS= FA-17.1 Food supplements supplied in a solid form including capsules and tablets and similar forms, excluding chewable forms
P0445	A03SS#F03.A06JH$F04.A0ETZ$F33.A0C16	The ingredient indicated as Powdered extract of plant origin is curcuma root dry extract.	Herbal formulations and plant extracts, STATE= Tablets, INGRED= Powdered extract of plant origin, LEGIS= FA-17.1 Food supplements supplied in a solid form including capsules and tablets and similar forms, excluding chewable forms
P0446	A03SS#F03.A06JH$F04.A0ETZ$F33.A0C16	The ingredient indicated as Powdered extract of plant origin is echinacea whole plant dry extract.	Herbal formulations and plant extracts, STATE= Tablets, INGRED= Powdered extract of plant origin, LEGIS= FA-17.1 Food supplements supplied in a solid form including capsules and tablets and similar forms, excluding chewable forms
P0447	A03SS#F03.A06JH$F04.A0ETZ$F33.A0C16	The ingredient indicated as Powdered extract of plant origin is eleutherococcus root dry extract.	Herbal formulations and plant extracts, STATE= Tablets, INGRED= Powdered extract of plant origin, LEGIS= FA-17.1 Food supplements supplied in a solid form including capsules and tablets and similar forms, excluding chewable forms
P0448	A03SS#F03.A06JH$F04.A0ETZ$F33.A0C16	The ingredient indicated as Powdered extract of plant origin is equiseto aereal parts dry extract.	Herbal formulations and plant extracts, STATE= Tablets, INGRED= Powdered extract of plant origin, LEGIS= FA-17.1 Food supplements supplied in a solid form including capsules and tablets and similar forms, excluding chewable forms
P0449	A03SS#F03.A06JH$F04.A0ETZ$F33.A0C16	The ingredient indicated as Powdered extract of plant origin is escolzia aereal parts dry extract.	Herbal formulations and plant extracts, STATE= Tablets, INGRED= Powdered extract of plant origin, LEGIS= FA-17.1 Food supplements supplied in a solid form including capsules and tablets and similar forms, excluding chewable forms
P0450	A03SS#F03.A06JH$F04.A0ETZ$F33.A0C16	The ingredient indicated as Powdered extract of plant origin is fennel fruit dry extract.	Herbal formulations and plant extracts, STATE= Tablets, INGRED= Powdered extract of plant origin, LEGIS= FA-17.1 Food supplements supplied in a solid form including capsules and tablets and similar forms, excluding chewable forms
P0451	A03ST#F03.A06JH$F04.A00VK$F33.A0C16	The ingredients indicated as Brown algae is fucus dry extract	Algae based formulations (e.g. Spirulina, chlorella), STATE= Tablets, INGRED= Brown algae, LEGIS= FA-17.1 Food supplements supplied in a solid form including capsules and tablets and similar forms, excluding chewable forms
P0452	A03SS#F03.A06JH$F04.A0ETZ$F33.A0C16	The ingredient indicated as Powdered extract of plant origin is ginkgo leaves dry extract.	Herbal formulations and plant extracts, STATE= Tablets, INGRED= Powdered extract of plant origin, LEGIS= FA-17.1 Food supplements supplied in a solid form including capsules and tablets and similar forms, excluding chewable forms
P0453	A03SS#F03.A06JH$F04.A0ETZ$F33.A0C16	The ingredient indicated as Powdered extract of plant origin is ginseng root dry extract.	Herbal formulations and plant extracts, STATE= Tablets, INGRED= Powdered extract of plant origin, LEGIS= FA-17.1 Food supplements supplied in a solid form including capsules and tablets and similar forms, excluding chewable forms
P0454	A03SS#F03.A06JH$F04.A0ETZ$F33.A0C16	The ingredient indicated as Powdered extract of plant origin is guaranà seed dry extract.	Herbal formulations and plant extracts, STATE= Tablets, INGRED= Powdered extract of plant origin, LEGIS= FA-17.1 Food supplements supplied in a solid form including capsules and tablets and similar forms, excluding chewable forms
P0455	A03SS#F03.A06JH$F04.A0ETZ$F33.A0C16	The ingredient indicated as Powdered extract of plant origin is lemon balm leaves dry extract.	Herbal formulations and plant extracts, STATE= Tablets, INGRED= Powdered extract of plant origin, LEGIS= FA-17.1 Food supplements supplied in a solid form including capsules and tablets and similar forms, excluding chewable forms
P0456	A03SS#F03.A06JH$F04.A0ETZ$F33.A0C16	The ingredient indicated as Powdered extract of plant origin is blueberry dry extract.	Herbal formulations and plant extracts, STATE= Tablets, INGRED= Powdered extract of plant origin, LEGIS= FA-17.1 Food supplements supplied in a solid form including capsules and tablets and similar forms, excluding chewable forms
P0457	A03SS#F03.A06JH$F04.A0ETZ$F33.A0C16	The ingredient indicated as Powdered extract of plant origin is feverfew aereal parts dry extract.	Herbal formulations and plant extracts, STATE= Tablets, INGRED= Powdered extract of plant origin, LEGIS= FA-17.1 Food supplements supplied in a solid form including capsules and tablets and similar forms, excluding chewable forms
P0458	A03SS#F03.A06JH$F04.A0ETZ$F33.A0C16	The ingredient indicated as Powdered extract of plant origin is polygonum root dry extract.	Herbal formulations and plant extracts, STATE= Tablets, INGRED= Powdered extract of plant origin, LEGIS= FA-17.1 Food supplements supplied in a solid form including capsules and tablets and similar forms, excluding chewable forms
P0459	A03SS#F03.A06JH$F04.A0ETZ$F33.A0C16	The ingredient indicated as Powdered extract of plant origin is grapefruit seed dry extract.	Herbal formulations and plant extracts, STATE= Tablets, INGRED= Powdered extract of plant origin, LEGIS= FA-17.1 Food supplements supplied in a solid form including capsules and tablets and similar forms, excluding chewable forms
P0460	A03SS#F03.A06JH$F04.A0ETZ$F33.A0C16	The ingredient indicated as Powdered extract of plant origin is stone breake leaves and flowers dry extract.	Herbal formulations and plant extracts, STATE= Tablets, INGRED= Powdered extract of plant origin, LEGIS= FA-17.1 Food supplements supplied in a solid form including capsules and tablets and similar forms, excluding chewable forms
P0461	A03SS#F03.A06JH$F04.A0ETZ$F33.A0C16	The ingredient indicated as Powdered extract of plant origin is garcinia fruits dry extract.	Herbal formulations and plant extracts, STATE= Tablets, INGRED= Powdered extract of plant origin, LEGIS= FA-17.1 Food supplements supplied in a solid form including capsules and tablets and similar forms, excluding chewable forms
P0462	A03SS#F03.A06JH$F04.A0ETZ$F33.A0C16	The ingredient indicated as Powdered extract of plant origin is jujube red date seeds dry extract.	Herbal formulations and plant extracts, STATE= Tablets, INGRED= Powdered extract of plant origin, LEGIS= FA-17.1 Food supplements supplied in a solid form including capsules and tablets and similar forms, excluding chewable forms
P0463	A03SS#F03.A06JH$F04.A0ETZ$F33.A0C16	The ingredient indicated as Powdered extract of plant origin is goji fruits dry extract.	Herbal formulations and plant extracts, STATE= Tablets, INGRED= Powdered extract of plant origin, LEGIS= FA-17.1 Food supplements supplied in a solid form including capsules and tablets and similar forms, excluding chewable forms
P0464	A03SS#F03.A06JH$F04.A0ETZ$F33.A0C16	The ingredient indicated as Powdered extract of plant origin is grindelia flowering tops dry extract.	Herbal formulations and plant extracts, STATE= Tablets, INGRED= Powdered extract of plant origin, LEGIS= FA-17.1 Food supplements supplied in a solid form including capsules and tablets and similar forms, excluding chewable forms
P0465	A03SS#F03.A06JH$F04.A0ETZ$F33.A0C16	The ingredient indicated as Powdered extract of plant origin is gymnema leaves dry extract.	Herbal formulations and plant extracts, STATE= Tablets, INGRED= Powdered extract of plant origin, LEGIS= FA-17.1 Food supplements supplied in a solid form including capsules and tablets and similar forms, excluding chewable forms
P0466	A03SS#F03.A06JH$F04.A0ETZ$F33.A0C16	The ingredient indicated as Powdered extract of plant origin is jiaogulan aereal parts dry extract.	Herbal formulations and plant extracts, STATE= Tablets, INGRED= Powdered extract of plant origin, LEGIS= FA-17.1 Food supplements supplied in a solid form including capsules and tablets and similar forms, excluding chewable forms
P0467	A03SS#F03.A06JH$F04.A0ETZ$F33.A0C16	The ingredient indicated as Powdered extract of plant origin is baical skullcap root dry extract.	Herbal formulations and plant extracts, STATE= Tablets, INGRED= Powdered extract of plant origin, LEGIS= FA-17.1 Food supplements supplied in a solid form including capsules and tablets and similar forms, excluding chewable forms
P0468	A03SS#F03.A06JH$F04.A0ETZ$F33.A0C16	The ingredient indicated as Powdered extract of plant origin is Schisandra fruit dry extract.	Herbal formulations and plant extracts, STATE= Tablets, INGRED= Powdered extract of plant origin, LEGIS= FA-17.1 Food supplements supplied in a solid form including capsules and tablets and similar forms, excluding chewable forms
P0469	A03SS#F03.A06JH$F04.A0ETZ$F33.A0C16	The ingredient indicated as Powdered extract of plant origin is chinese sage root dry extract.	Herbal formulations and plant extracts, STATE= Tablets, INGRED= Powdered extract of plant origin, LEGIS= FA-17.1 Food supplements supplied in a solid form including capsules and tablets and similar forms, excluding chewable forms
P0470	A03SS#F03.A06JH$F04.A0ETZ$F33.A0C16	The ingredient indicated as Powdered extract of plant origin is saw palmetto fruit dry extract.	Herbal formulations and plant extracts, STATE= Tablets, INGRED= Powdered extract of plant origin, LEGIS= FA-17.1 Food supplements supplied in a solid form including capsules and tablets and similar forms, excluding chewable forms
P0471	A03SS#F03.A06JH$F04.A0ETZ$F33.A0C16	The ingredient indicated as Powdered extract of plant origin is pink trumpet tree bark dry extract.	Herbal formulations and plant extracts, STATE= Tablets, INGRED= Powdered extract of plant origin, LEGIS= FA-17.1 Food supplements supplied in a solid form including capsules and tablets and similar forms, excluding chewable forms
P0472	A03SS#F03.A06JH$F04.A0ETZ$F33.A0C16	The ingredient indicated as Powdered extract of plant origin is dandelion root dry extract.	Herbal formulations and plant extracts, STATE= Tablets, INGRED= Powdered extract of plant origin, LEGIS= FA-17.1 Food supplements supplied in a solid form including capsules and tablets and similar forms, excluding chewable forms
P0473	A03SS#F03.A06JH$F04.A0ETZ$F33.A0C16	The ingredient indicated as Powdered extract of plant origin is cat's claw bark dry extract.	Herbal formulations and plant extracts, STATE= Tablets, INGRED= Powdered extract of plant origin, LEGIS= FA-17.1 Food supplements supplied in a solid form including capsules and tablets and similar forms, excluding chewable forms
P0474	A03SS#F03.A06JH$F04.A0ETZ$F33.A0C16	The ingredient indicated as Powdered extract of plant origin is red grapevines leaves dry extract.	Herbal formulations and plant extracts, STATE= Tablets, INGRED= Powdered extract of plant origin, LEGIS= FA-17.1 Food supplements supplied in a solid form including capsules and tablets and similar forms, excluding chewable forms
P0475	A03SS#F03.A06JH$F04.A0ETZ$F33.A0C16	The ingredient indicated as Powdered extract of plant origin is ashwagandha root dry extract.	Herbal formulations and plant extracts, STATE= Tablets, INGRED= Powdered extract of plant origin, LEGIS= FA-17.1 Food supplements supplied in a solid form including capsules and tablets and similar forms, excluding chewable forms
P0476	A03SS#F03.A06JH$F04.A0ETZ$F33.A0C16	The ingredient indicated as Powdered extract of plant origin is maca root dry extract.	Herbal formulations and plant extracts, STATE= Tablets, INGRED= Powdered extract of plant origin, LEGIS= FA-17.1 Food supplements supplied in a solid form including capsules and tablets and similar forms, excluding chewable forms
P0477	A03SS#F03.A06JH$F04.A0ETZ$F33.A0C16	The ingredient indicated as Powdered extract of plant origin is magnolia bark dry extract.	Herbal formulations and plant extracts, STATE= Tablets, INGRED= Powdered extract of plant origin, LEGIS= FA-17.1 Food supplements supplied in a solid form including capsules and tablets and similar forms, excluding chewable forms
P0478	A03SS#F03.A06JH$F04.A0ETZ$F33.A0C16	The ingredient indicated as Powdered extract of plant origin is pomegranate fruit dry extract.	Herbal formulations and plant extracts, STATE= Tablets, INGRED= Powdered extract of plant origin, LEGIS= FA-17.1 Food supplements supplied in a solid form including capsules and tablets and similar forms, excluding chewable forms
P0479	A03SS#F03.A06JH$F04.A0ETZ$F33.A0C16	The ingredient indicated as Powdered extract of plant origin is passion flower dry extract.	Herbal formulations and plant extracts, STATE= Tablets, INGRED= Powdered extract of plant origin, LEGIS= FA-17.1 Food supplements supplied in a solid form including capsules and tablets and similar forms, excluding chewable forms
P0480	A03SS#F03.A06JH$F04.A0ETZ$F33.A0C16	The ingredient indicated as Powdered extract of plant origin is long pepper fruit dry extract.	Herbal formulations and plant extracts, STATE= Tablets, INGRED= Powdered extract of plant origin, LEGIS= FA-17.1 Food supplements supplied in a solid form including capsules and tablets and similar forms, excluding chewable forms
P0481	A03SS#F03.A06JH$F04.A0ETZ$F33.A0C16	The ingredient indicated as Powdered extract of plant origin is rhodiola root dry extract.	Herbal formulations and plant extracts, STATE= Tablets, INGRED= Powdered extract of plant origin, LEGIS= FA-17.1 Food supplements supplied in a solid form including capsules and tablets and similar forms, excluding chewable forms
P0482	A03SS#F03.A06JH$F04.A0ETZ$F33.A0C16	The ingredient indicated as Powdered extract of plant origin is Rooibos leaves dry extract.	Herbal formulations and plant extracts, STATE= Tablets, INGRED= Powdered extract of plant origin, LEGIS= FA-17.1 Food supplements supplied in a solid form including capsules and tablets and similar forms, excluding chewable forms
P0483	A03SS#F03.A06JH$F04.A0ETZ$F33.A0C16	The ingredient indicated as Powdered extract of plant origin is butcher's broom root dry extract.	Herbal formulations and plant extracts, STATE= Tablets, INGRED= Powdered extract of plant origin, LEGIS= FA-17.1 Food supplements supplied in a solid form including capsules and tablets and similar forms, excluding chewable forms
P0484	A03SS#F03.A06JH$F04.A0ETZ$F33.A0C16	The ingredient indicated as Powdered extract of plant origin is triphala fruit dry extract.	Herbal formulations and plant extracts, STATE= Tablets, INGRED= Powdered extract of plant origin, LEGIS= FA-17.1 Food supplements supplied in a solid form including capsules and tablets and similar forms, excluding chewable forms
P0485	A03SS#F03.A06JH$F04.A0ETZ$F33.A0C16	The ingredient indicated as Powdered extract of plant origin is shatavari root dry extract.	Herbal formulations and plant extracts, STATE= Tablets, INGRED= Powdered extract of plant origin, LEGIS= FA-17.1 Food supplements supplied in a solid form including capsules and tablets and similar forms, excluding chewable forms
P0486	A03SS#F03.A06JH$F04.A0ETZ$F33.A0C16	The ingredient indicated as Powdered extract of plant origin is bearberry leaves dry extract.	Herbal formulations and plant extracts, STATE= Tablets, INGRED= Powdered extract of plant origin, LEGIS= FA-17.1 Food supplements supplied in a solid form including capsules and tablets and similar forms, excluding chewable forms
P0487	A03SS#F03.A06JH$F04.A0ETZ$F33.A0C16	The ingredient indicated as Powdered extract of plant origin is tulsi leaves dry extract.	Herbal formulations and plant extracts, STATE= Tablets, INGRED= Powdered extract of plant origin, LEGIS= FA-17.1 Food supplements supplied in a solid form including capsules and tablets and similar forms, excluding chewable forms
P0488	A03SS#F03.A06JH$F04.A0ETZ$F33.A0C16	The ingredient indicated as Powdered extract of plant origin is valerian rhizome dry extract.	Herbal formulations and plant extracts, STATE= Tablets, INGRED= Powdered extract of plant origin, LEGIS= FA-17.1 Food supplements supplied in a solid form including capsules and tablets and similar forms, excluding chewable forms
P0489	A03SS#F03.A06JH$F04.A0ETZ$F33.A0C16	The ingredient indicated as Powdered extract of plant origin is ginger rhizome dry extract.	Herbal formulations and plant extracts, STATE= Tablets, INGRED= Powdered extract of plant origin, LEGIS= FA-17.1 Food supplements supplied in a solid form including capsules and tablets and similar forms, excluding chewable forms
P0490	A03TC#F04.A00VK$F04.A0EVF$F04.A0EXA$F33.A0C16	The ingredients indicated as Brown algae are Ascophyllum nodosum and Fucus vesiculosus. The ingredient indicated as Chemical elements is chrome	Mixed supplements/formulations, INGRED= Brown algae, INGRED=Chemical elements, INGRED= Iodine, LEGIS= FA-17.1 Food supplements supplied in a solid form including capsules and tablets and similar forms, excluding chewable forms
P0491	A03TC#F04.A0ETZ$F04.A0EXF	The ingredient indicated as Powdered extract of plant origin is Griffonia seeds dry extract and Parthenium flowers dry extract.	Mixed supplements/formulations, INGRED= Powdered extract of plant origin, INGRED= Magnesium
P0492	A03TC#F04.A0F4P$F04.A0F4N$F04.A0EXJ$F04.A0EXF$F04.A0EXD$F04.A0EVZ$F04.A0EXN$F04.A0EXL	Amino acids are also contained.	Mixed supplements/formulations, INGRED= Creatine-creatinine, INGRED= Carnitine, INGRED= Potassium, INGRED= Magnesium, INGRED= Iron, INGRED= Selenium, INGRED= Vitamin C (ascorbic acid), INGRED= Vitamin E (tocopherols, tocotrienols)
P0493	A03TC#F04.A0ETZ$F04.A0EXN$F33.A0C16	The ingredient indicated as Powdered extract of plant origin is bilberry dry extract	Mixed supplements/formulations, INGRED= Powdered extract of plant origin, INGRED= Vitamin C (ascorbic acid), LEGIS= FA-17.1 Food supplements supplied in a solid form including capsules and tablets and similar forms, excluding chewable forms
P0494	A03SS#F04.A0ETZ$F33.A0C16	The ingredient indicated as Powdered extract of plant origin is valeriana root dry extract.	Herbal formulations and plant extracts, INGRED= Powdered extract of plant origin, LEGIS= FA-17.1 Food supplements supplied in a solid form including capsules and tablets and similar forms, excluding chewable forms
P0495	A03TC#F03.A06JL$F04.A03BN$F04.A0EVZ$F33.A0C15	The ingredient indicated as Fruit juice concentrates is pomegranate concentrated juice	Mixed supplements/formulations, STATE= Liquid, INGRED= Fruit juice concentrates, INGRED= Selenium, LEGIS= FA-17.2 Food supplements supplied in a liquid form
P0496	A03SS#F04.A0ETZ$F33.A0C16	The ingredient indicated as Powdered extract of plant origin is green coffee seed dry extract.	Herbal formulations and plant extracts, INGRED= Powdered extract of plant origin, LEGIS= FA-17.1 Food supplements supplied in a solid form including capsules and tablets and similar forms, excluding chewable forms
P0497	A03SS#F04.A01MA$F33.A0C16	The ingredient indicated as Dried fruit is pineapple jambs powder.	Herbal formulations and plant extracts, INGRED= Dried fruit, LEGIS= FA-17.1 Food supplements supplied in a solid form including capsules and tablets and similar forms, excluding chewable forms
P0498	A03SS#F04.A0ETZ$F33.A0C16	The ingredient indicated as Powdered extract of plant origin is green organic pineapple jambs dry extract.	Herbal formulations and plant extracts, INGRED= Powdered extract of plant origin, LEGIS= FA-17.1 Food supplements supplied in a solid form including capsules and tablets and similar forms, excluding chewable forms
P0499	A03TC#F03.A06JH$F04.A0ETZ$F04.A0EXN$F33.A0C16	The ingredients indicated as Powdered extract of plant origin are boswellia resin gum dry extract , willowbark dry extract, equiseto aereal parts dry extract, ginger rhizome dry extract	Mixed supplements/formulations, STATE= Tablets, INGRED= Powdered extract of plant origin, INGRED= Vitamin C (ascorbic acid), LEGIS= FA-17.1 Food supplements supplied in a solid form including capsules and tablets and similar forms, excluding chewable forms
P0500	A03TC#F03.A06JH$F04.A0ETY$F04.A0ETZ$F04.A0EXF$F33.A0C16	The ingredients indicated as Extract of plant origin are willow common hops flower and valerian root extract. The ingredients indicated as Powdered extract of plant origin is licorice root dry extract.	Mixed supplements/formulations, STATE= Tablets, INGRED= Extracts of plant origin, INGRED= Powdered extract of plant origin, INGRED= Magnesium, LEGIS= FA-17.1 Food supplements supplied in a solid form including capsules and tablets and similar forms, excluding chewable forms
P0501	A03SS#F04.A03DA$F33.A0C16	The ingredient indicated as Dehydrated/Powder vegetable juice is dehydrated juice concentrate of carrot	Herbal formulations and plant extracts, INGRED= Dehydrated/powdered vegetable juice, LEGIS= FA-17.1 Food supplements supplied in a solid form including capsules and tablets and similar forms, excluding chewable forms
P0502	A03SS#F03.A06JH$F04.A0ETZ$F33.A0C16	The ingredients indicated as Powdered extract of plant origin is wild yam root dry extract	Herbal formulations and plant extracts, STATE= Tablets, INGRED= Powdered extract of plant origin, LEGIS= FA-17.1 Food supplements supplied in a solid form including capsules and tablets and similar forms, excluding chewable forms
P0503	A03SS#F04.A016T$F33.A0C16	The ingredient indicated as Dried Herbs is dog rose fruit powder.	Herbal formulations and plant extracts, INGRED= Dried herbs, LEGIS= FA-17.1 Food supplements supplied in a solid form including capsules and tablets and similar forms, excluding chewable forms
P0504	A03SS#F04.A016T$F33.A0C16	The ingredient indicated as Dried Herbs is uncaria bark micronized powder.	Herbal formulations and plant extracts, INGRED= Dried herbs, LEGIS= FA-17.1 Food supplements supplied in a solid form including capsules and tablets and similar forms, excluding chewable forms
P0505	A03SS#F03.A06JH$F04.A0ETZ$F33.A0C16	The ingredients indicated as Powdered extract of plant origin are dandelion and artichoke dry extracts.	Herbal formulations and plant extracts, STATE= Tablets, INGRED= Powdered extract of plant origin, LEGIS= FA-17.1 Food supplements supplied in a solid form including capsules and tablets and similar forms, excluding chewable forms
P0506	A03ST#F03.A06JH$F04.A00VK$F33.A0C16	The ingredient indicated as Brown algae is Fucus thallus powder	Algae based formulations (e.g. Spirulina, chlorella), STATE= Tablets, INGRED= Brown algae, LEGIS= FA-17.1 Food supplements supplied in a solid form including capsules and tablets and similar forms, excluding chewable forms
P0507	A03ST#F03.A06JH$F04.A00VP$F33.A0C16		Algae based formulations (e.g. Spirulina, chlorella), STATE= Tablets, INGRED= Spirulina, LEGIS= FA-17.1 Food supplements supplied in a solid form including capsules and tablets and similar forms, excluding chewable forms
P0508	A03SS#F04.A0ETZ$F33.A0C16	The ingredient indicated as Powdered extract of plant origin is green tea leaves dry extract.	Herbal formulations and plant extracts, INGRED= Powdered extract of plant origin, LEGIS= FA-17.1 Food supplements supplied in a solid form including capsules and tablets and similar forms, excluding chewable forms
P0509	A03SS#F04.A0ETZ$F33.A0C16	The ingredient indicated as Powdered extract of plant origin is equiseto aereal parts dry extract.	Herbal formulations and plant extracts, INGRED= Powdered extract of plant origin, LEGIS= FA-17.1 Food supplements supplied in a solid form including capsules and tablets and similar forms, excluding chewable forms
P0510	A03SS#F04.A016T$F33.A0C16	The ingredient indicated as Dried Herbs is guaranà seeds micronized powder.	Herbal formulations and plant extracts, INGRED= Dried herbs, LEGIS= FA-17.1 Food supplements supplied in a solid form including capsules and tablets and similar forms, excluding chewable forms
P0511	A03SS#F04.A016T$F33.A0C16	The ingredient indicated as Dried herbs is devil's claw micronised powder	Herbal formulations and plant extracts, INGRED= Dried herbs, LEGIS= FA-17.1 Food supplements supplied in a solid form including capsules and tablets and similar forms, excluding chewable forms
P0512	A03SS#F03.A06JH$F04.A0ETZ$F33.A0C16	The ingredient indicated as Powdered extract of plant origin is bean pod dry extract.	Herbal formulations and plant extracts, STATE= Tablets, INGRED= Powdered extract of plant origin, LEGIS= FA-17.1 Food supplements supplied in a solid form including capsules and tablets and similar forms, excluding chewable forms
P0513	A03SS#F04.A016T$F33.A0C16	The ingredient indicated as Dried Herbs is hawthorn leaves and flowers powder	Herbal formulations and plant extracts, INGRED= Dried herbs, LEGIS= FA-17.1 Food supplements supplied in a solid form including capsules and tablets and similar forms, excluding chewable forms
P0514	A03SS#F04.A0ETZ$F33.A0C16	The ingredient indicated as Powdered extract of plant origin is artichoke leaves dry extract.	Herbal formulations and plant extracts, INGRED= Powdered extract of plant origin, LEGIS= FA-17.1 Food supplements supplied in a solid form including capsules and tablets and similar forms, excluding chewable forms
P0515	A03SS#F04.A016T$F33.A0C16	The ingredient indicated as Dried Herbs is fennel seed micronized powder	Herbal formulations and plant extracts, INGRED= Dried herbs, LEGIS= FA-17.1 Food supplements supplied in a solid form including capsules and tablets and similar forms, excluding chewable forms
P0516	A03SS#F04.A016T$F33.A0C16	The ingredient indicated as Dried Herbs is mallow leaves and flowers powder	Herbal formulations and plant extracts, INGRED= Dried herbs, LEGIS= FA-17.1 Food supplements supplied in a solid form including capsules and tablets and similar forms, excluding chewable forms
P0517	A03SS#F04.A0ETZ$F33.A0C16	The ingredient indicated as Powdered extract of plant origin is dandelion root dry extract.	Herbal formulations and plant extracts, INGRED= Powdered extract of plant origin, LEGIS= FA-17.1 Food supplements supplied in a solid form including capsules and tablets and similar forms, excluding chewable forms
P0518	A03SS#F04.A0ETZ$F33.A0C16	The ingredient indicated as Powdered extracts of plant origin are curcuma rhizome dry extract	Herbal formulations and plant extracts, INGRED= Powdered extract of plant origin, LEGIS= FA-17.1 Food supplements supplied in a solid form including capsules and tablets and similar forms, excluding chewable forms
P0519	A03TC#F04.A0ETZ$F04.A0EVP$F33.A0C16	The ingredients indicated as Powdered extract of plant origin are echinacea dry extract root , astragalus root dry extract , acerola dry extract fruits. The ingredient indicated as Polyphenols is quercetin.	Mixed supplements/formulations, INGRED= Powdered extract of plant origin, INGRED= Polyphenols, LEGIS= FA-17.1 Food supplements supplied in a solid form including capsules and tablets and similar forms, excluding chewable forms
P0520	A03TC#F04.A0ETZ$F04.A0EVN$F33.A0C16	The ingredients indicated as Powdered extract of plant origin are carrot root dry extract, marigold lowers dry extract, acerola fruit dry extract, grape seed dry extract. The ingredient indicated as Carotenoids is beta-carotene.	Mixed supplements/formulations, INGRED= Powdered extract of plant origin, INGRED= Carotenoids, LEGIS= FA-17.1 Food supplements supplied in a solid form including capsules and tablets and similar forms, excluding chewable forms
P0521	A03SS#F04.A016T$F04.A0ETZ$F33.A0C16	The ingredient indicated as Dried herbs is horsetail sterile stems powder. The ingredient indicated as Powdered extract of plant origin is horsetail sterile stems dry extract .	Herbal formulations and plant extracts, INGRED= Dried herbs, INGRED= Powdered extract of plant origin, LEGIS= FA-17.1 Food supplements supplied in a solid form including capsules and tablets and similar forms, excluding chewable forms
P0522	A03SS#F04.A0ETZ$F33.A0C16	The ingredient indicated as Powdered extract of plant origin is açai fruit dry extract .	Herbal formulations and plant extracts, INGRED= Powdered extract of plant origin, LEGIS= FA-17.1 Food supplements supplied in a solid form including capsules and tablets and similar forms, excluding chewable forms
P0523	A03SS#F04.A0ETZ$F33.A0C16	The ingredient indicated as Powdered extract of plant origin is acerola fruit dry extract .	Herbal formulations and plant extracts, INGRED= Powdered extract of plant origin, LEGIS= FA-17.1 Food supplements supplied in a solid form including capsules and tablets and similar forms, excluding chewable forms
P0524	A03SS#F04.A00ZQ$F04.A0ETZ$F33.A0C16	The ingredient indicated as Dried vegetables is garlic bulb powder. The ingredient indicated as Powdered extract of plant origin is garlic bulb dry extract .	Herbal formulations and plant extracts, INGRED= Dried vegetables, INGRED= Powdered extract of plant origin, LEGIS= FA-17.1 Food supplements supplied in a solid form including capsules and tablets and similar forms, excluding chewable forms
P0525	A03SS#F04.A01MA$F04.A0ETZ$F33.A0C16	The ingredient indicated as Dried fruit is pineapple jambs powder. The ingredient indicated as Powdered extract of plant origin is pineapple jambs dry extract .	Herbal formulations and plant extracts, INGRED= Dried fruit, INGRED= Powdered extract of plant origin, LEGIS= FA-17.1 Food supplements supplied in a solid form including capsules and tablets and similar forms, excluding chewable forms
P0526	A03SS#F04.A0ETZ$F33.A0C16	The ingredient indicated as Powdered extract of plant origin is bitter orange peel dry extract .	Herbal formulations and plant extracts, INGRED= Powdered extract of plant origin, LEGIS= FA-17.1 Food supplements supplied in a solid form including capsules and tablets and similar forms, excluding chewable forms
P0527	A03SS#F04.A016T$F04.A0ETZ$F33.A0C16	The ingredient indicated as Dried herbs is Devil's claw root powder. The ingredient indicated as Powdered extract of plant origin is Devil's claw root dry extract.	Herbal formulations and plant extracts, INGRED= Dried herbs, INGRED= Powdered extract of plant origin, LEGIS= FA-17.1 Food supplements supplied in a solid form including capsules and tablets and similar forms, excluding chewable forms
P0528	A03SS#F04.A016T$F04.A0ETZ$F33.A0C16	The ingredient ìndicated as dried herbs is burdock root powder. The ingredient indicated as powdered extract of plant origin is burdock root dry extract.	Herbal formulations and plant extracts, INGRED= Dried herbs, INGRED= Powdered extract of plant origin, LEGIS= FA-17.1 Food supplements supplied in a solid form including capsules and tablets and similar forms, excluding chewable forms
P0529	A03SS#F04.A016T$F04.A0ETZ$F33.A0C16	The ingredient ìndicated as dried herbs is birch leaves powder. The ingredient indicated as powdered extract of plant origin is birch leaves dry extract.	Herbal formulations and plant extracts, INGRED= Dried herbs, INGRED= Powdered extract of plant origin, LEGIS= FA-17.1 Food supplements supplied in a solid form including capsules and tablets and similar forms, excluding chewable forms
P0530	A03SS#F04.A016T$F04.A0ETZ$F33.A0C16	The ingredient ìndicated as dried herbs is Hawthorn leaves and flowers powder. The ingredient indicated as powdered extract of plant origin is Hawthorn leaves and flowers dry extract.	Herbal formulations and plant extracts, INGRED= Dried herbs, INGRED= Powdered extract of plant origin, LEGIS= FA-17.1 Food supplements supplied in a solid form including capsules and tablets and similar forms, excluding chewable forms
P0531	A03SS#F04.A016T$F04.A0ETZ$F33.A0C16	The ingredient ìndicated as dried herbs is green coffee seed powder. The ingredient indicated as powdered extract of plant origin is green coffee seed dry extract.	Herbal formulations and plant extracts, INGRED= Dried herbs, INGRED= Powdered extract of plant origin, LEGIS= FA-17.1 Food supplements supplied in a solid form including capsules and tablets and similar forms, excluding chewable forms
P0532	A03SS#F04.A00ZQ$F04.A0ETZ$F33.A0C16	The ingredient indicated as Dried vegetables is artichoke leaves powder. The ingredient indicated as Powdered extract of plant origin is artichoke leaves dry extract .	Herbal formulations and plant extracts, INGRED= Dried vegetables, INGRED= Powdered extract of plant origin, LEGIS= FA-17.1 Food supplements supplied in a solid form including capsules and tablets and similar forms, excluding chewable forms
P0533	A03SS#F04.A00ZQ$F04.A0ETZ$F33.A0C16	The ingredient indicated as Dried vegetables is milk thistle fruits powder. The ingredient indicated as Powdered extract of plant origin is milk thistle fruits dry extract .	Herbal formulations and plant extracts, INGRED= Dried vegetables, INGRED= Powdered extract of plant origin, LEGIS= FA-17.1 Food supplements supplied in a solid form including capsules and tablets and similar forms, excluding chewable forms
P0534	A03SS#F04.A00ZQ$F04.A0ETZ$F33.A0C16	The ingredient indicated as Dried vegetables is carrot root powder. The ingredient indicated as Powdered extract of plant origin is carrot root dry extract .	Herbal formulations and plant extracts, INGRED= Dried vegetables, INGRED= Powdered extract of plant origin, LEGIS= FA-17.1 Food supplements supplied in a solid form including capsules and tablets and similar forms, excluding chewable forms
P0535	A03SS#F04.A016T$F04.A0ETZ$F33.A0C16	The ingredient ìndicated as dried herbs is centella aereal parts powder. The ingredient indicated as powdered extract of plant origin is centella aereal parts dry extract.	Herbal formulations and plant extracts, INGRED= Dried herbs, INGRED= Powdered extract of plant origin, LEGIS= FA-17.1 Food supplements supplied in a solid form including capsules and tablets and similar forms, excluding chewable forms
P0536	A03SS#F04.A016T$F04.A0ETZ$F33.A0C16	The ingredient ìndicated as dried herbs is turmeric rhyzome powder. The ingredient indicated as powdered extract of plant origin is turmeric rhyzome dry extract.	Herbal formulations and plant extracts, INGRED= Dried herbs, INGRED= Powdered extract of plant origin, LEGIS= FA-17.1 Food supplements supplied in a solid form including capsules and tablets and similar forms, excluding chewable forms
P0537	A03SS#F04.A016T$F04.A0ETZ$F33.A0C16	The ingredient ìndicated as dried herbs is damiana leaves powder. The ingredient indicated as powdered extract of plant origin is damiana leaves dry extract.	Herbal formulations and plant extracts, INGRED= Dried herbs, INGRED= Powdered extract of plant origin, LEGIS= FA-17.1 Food supplements supplied in a solid form including capsules and tablets and similar forms, excluding chewable forms
P0538	A03SS#F04.A016T$F04.A0ETZ$F33.A0C16	The ingredient ìndicated as dried herbs is echinacea root powder. The ingredient indicated as powdered extract of plant origin is echinacea root dry extract.	Herbal formulations and plant extracts, INGRED= Dried herbs, INGRED= Powdered extract of plant origin, LEGIS= FA-17.1 Food supplements supplied in a solid form including capsules and tablets and similar forms, excluding chewable forms
P0539	A03SS#F04.A016T$F04.A0ETZ$F33.A0C16	The ingredient ìndicated as dried herbs is horsetail sterile stems powder. The ingredient indicated as powdered extract of plant origin is horsetail sterile stems dry extract.	Herbal formulations and plant extracts, INGRED= Dried herbs, INGRED= Powdered extract of plant origin, LEGIS= FA-17.1 Food supplements supplied in a solid form including capsules and tablets and similar forms, excluding chewable forms
P0540	A03SS#F04.A00ZQ$F04.A0ETZ$F33.A0C16	The ingredient indicated as Dried vegetables is bean pod powder. The ingredient indicated as Powdered extract of plant origin is bean pod dry extract .	Herbal formulations and plant extracts, INGRED= Dried vegetables, INGRED= Powdered extract of plant origin, LEGIS= FA-17.1 Food supplements supplied in a solid form including capsules and tablets and similar forms, excluding chewable forms
P0541	A03SS#F04.A016T$F04.A0ETZ$F33.A0C16	The ingredient indicated as Dried herbs is greek hay seed powder . The ingredient indicated as Powdered extract of plant origin is greek hay seed dry extract.	Herbal formulations and plant extracts, INGRED= Dried herbs, INGRED= Powdered extract of plant origin, LEGIS= FA-17.1 Food supplements supplied in a solid form including capsules and tablets and similar forms, excluding chewable forms
P0542	A03SS#F04.A00ZQ$F04.A0ETZ$F33.A0C16	The ingredient indicated as Dried vegetables is fennel fruit powder. The ingredient indicated as Powdered extract of plant origin is fennel fruit dry extract .	Herbal formulations and plant extracts, INGRED= Dried vegetables, INGRED= Powdered extract of plant origin, LEGIS= FA-17.1 Food supplements supplied in a solid form including capsules and tablets and similar forms, excluding chewable forms
P0543	A03SS#F04.A016T$F04.A0ETZ$F33.A0C16	The ingredient indicated as Dried herbs is ginkgo biloba leaves powder. The ingredient indicated as Powdered extract of plant origin is ginkgo biloba leaves dry extract.	Herbal formulations and plant extracts, INGRED= Dried herbs, INGRED= Powdered extract of plant origin, LEGIS= FA-17.1 Food supplements supplied in a solid form including capsules and tablets and similar forms, excluding chewable forms
P0544	A03SS#F04.A016T$F04.A0ETZ$F33.A0C16	The ingredient indicated as Dried herbs is griffonia seed powder. The ingredient indicated as Powdered extract of plant origin is griffonia seed dry extract.	Herbal formulations and plant extracts, INGRED= Dried herbs, INGRED= Powdered extract of plant origin, LEGIS= FA-17.1 Food supplements supplied in a solid form including capsules and tablets and similar forms, excluding chewable forms
P0545	A03SS#F04.A016T$F04.A0ETZ$F33.A0C16	The ingredient indicated as Dried herbs is maca root powder. The ingredient indicated as Powdered extract of plant origin is maca root dry extract.	Herbal formulations and plant extracts, INGRED= Dried herbs, INGRED= Powdered extract of plant origin, LEGIS= FA-17.1 Food supplements supplied in a solid form including capsules and tablets and similar forms, excluding chewable forms
P0546	A03SS#F04.A016T$F04.A0ETZ$F33.A0C16	The ingredient indicated as Dried herbs is Lemon balm leaves powder. The ingredient indicated as Powdered extract of plant origin is Lemon balm leaves dry extract.	Herbal formulations and plant extracts, INGRED= Dried herbs, INGRED= Powdered extract of plant origin, LEGIS= FA-17.1 Food supplements supplied in a solid form including capsules and tablets and similar forms, excluding chewable forms
P0547	A03SS#F04.A016T$F04.A0ETZ$F33.A0C16	The ingredient indicated as Dried herbs is passiflora flowering tops powder. The ingredient indicated as Powdered extract of plant origin is passiflora flowering tops dry extract.	Herbal formulations and plant extracts, INGRED= Dried herbs, INGRED= Powdered extract of plant origin, LEGIS= FA-17.1 Food supplements supplied in a solid form including capsules and tablets and similar forms, excluding chewable forms
P0548	A03SS#F04.A016T$F04.A0ETZ$F33.A0C16	The ingredient indicated as Dried herbs is roseroot root powder. The ingredient indicated as Powdered extract of plant origin is roseroot root dry extract.	Herbal formulations and plant extracts, INGRED= Dried herbs, INGRED= Powdered extract of plant origin, LEGIS= FA-17.1 Food supplements supplied in a solid form including capsules and tablets and similar forms, excluding chewable forms
P0549	A03SS#F04.A016T$F04.A0ETZ$F33.A0C16	The ingredient indicated as Dried herbs is dog rose cinorroids powder. The ingredient indicated as Powdered extract of plant origin is dog rose cinorroids dry extract.	Herbal formulations and plant extracts, INGRED= Dried herbs, INGRED= Powdered extract of plant origin, LEGIS= FA-17.1 Food supplements supplied in a solid form including capsules and tablets and similar forms, excluding chewable forms
P0550	A03SS#F04.A00ZQ$F04.A0ETZ$F33.A0C16	The ingredient indicated as Dried vegetables is willow bark powder. The ingredient indicated as Powdered extract of plant origin is willow bark dry extract.	Herbal formulations and plant extracts, INGRED= Dried vegetables, INGRED= Powdered extract of plant origin, LEGIS= FA-17.1 Food supplements supplied in a solid form including capsules and tablets and similar forms, excluding chewable forms
P0551	A03SS#F04.A016T$F04.A0ETZ$F33.A0C16	The ingredient indicated as Dried herbs is dandelion root powder. The ingredient indicated as Powdered extract of plant origin is dandelion root dry extract.	Herbal formulations and plant extracts, INGRED= Dried herbs, INGRED= Powdered extract of plant origin, LEGIS= FA-17.1 Food supplements supplied in a solid form including capsules and tablets and similar forms, excluding chewable forms
P0552	A03SS#F04.A016T$F04.A0ETZ$F33.A0C16	The ingredient indicated as Dried herbs is green tea powder. The ingredient indicated as Powdered extract of plant origin is green tea dry extract.	Herbal formulations and plant extracts, INGRED= Dried herbs, INGRED= Powdered extract of plant origin, LEGIS= FA-17.1 Food supplements supplied in a solid form including capsules and tablets and similar forms, excluding chewable forms
P0553	A03SS#F04.A016T$F04.A0ETZ$F33.A0C16	The ingredient indicated as Dried herbs is clover powder. The ingredient indicated as Powdered extract of plant origin is clover dry extract.	Herbal formulations and plant extracts, INGRED= Dried herbs, INGRED= Powdered extract of plant origin, LEGIS= FA-17.1 Food supplements supplied in a solid form including capsules and tablets and similar forms, excluding chewable forms
P0554	A03SS#F04.A016T$F04.A0ETZ$F33.A0C16	The ingredient indicated as Dried herbs is cat's claw powder. The ingredient indicated as Powdered extract of plant origin is cat's claw dry extract.	Herbal formulations and plant extracts, INGRED= Dried herbs, INGRED= Powdered extract of plant origin, LEGIS= FA-17.1 Food supplements supplied in a solid form including capsules and tablets and similar forms, excluding chewable forms
P0555	A03SS#F04.A016T$F04.A0ETZ$F33.A0C16	The ingredient indicated as Dried herbs is valerian root powder. The ingredient indicated as Powdered extract of plant origin is valerian root dry extract.	Herbal formulations and plant extracts, INGRED= Dried herbs, INGRED= Powdered extract of plant origin, LEGIS= FA-17.1 Food supplements supplied in a solid form including capsules and tablets and similar forms, excluding chewable forms
P0556	A03SM#F03.A06JH$F04.A0EXJ$F04.A0EXF$F33.A0C16		Mineral only supplements, STATE= Tablets, INGRED= Potassium, INGRED= Magnesium, LEGIS= FA-17.1 Food supplements supplied in a solid form including capsules and tablets and similar forms, excluding chewable forms
P0557	A03SN#F04.A0EXJ$F04.A0EXF$F04.A0EXE$F04.A0EXQ		Combination of vitamin and mineral only supplements, INGRED= Potassium, INGRED= Magnesium, INGRED= Zinc, INGRED= Vitamin B9 (folic acid, folinic acid)
P0558	A0F3Y#F03.A06JL$F04.A0BXY$F33.A0C15	The ingredients indicated as Microbiological or enzymatic ingredients are microbiological ingredients, Lactobacillus rhamnosus, Saccharomyces cerevisiae var. boulardii.	Probiotic or prebiotic formulations, STATE= Liquid, INGRED= Microbiological or enzymatic ingredients, LEGIS= FA-17.2 Food supplements supplied in a liquid form
